# Supplementary material for: Management of chronic headache with referral from primary care to direct access to MRI compared with Neurology services: an observational prospective study in London
Source: PubMed Central journal article supplement — BMJ Open. 2020 Oct 16;10(10):e036097. doi: 10.1136/bmjopen-2019-036097 (PMC7569948; doi:10.1136/bmjopen-2019-036097), 2020-10-16
Supplement: bmjopen-2019-036097.draft_revisions.pdf [file bmjopen-2019-036097.draft_revisions.pdf]

# BMJ Open

BMJ Open is committed to open peer review. As part of this commitment we make the peer review history of every article we publish publicly available.

When an article is published we post the peer reviewers' comments and the authors' responses online. We also post the versions of the paper that were used during peer review. These are the versions that the peer review comments apply to.

The versions of the paper that follow are the versions that were submitted during the peer review process. They are not the versions of record or the final published versions. They should not be cited or distributed as the published version of this manuscript.

BMJ Open is an open access journal and the full, final, typeset and author-corrected version of record of the manuscript is available on our site with no access controls, subscription charges or pay-per-view fees (<http://bmjopen.bmj.com>).

If you have any questions on BMJ Open's open peer review process please email [info.bmjopen@bmj.com](mailto:info.bmjopen@bmj.com)

# BMJ Open

## The management of chronic headache with referral from primary care to direct access to Magnetic Resonance Imaging (MRI) compared to Neurology services: an observational prospective study.

|                               |                                                                                                                                                                                                                                                                                                                                                                                                                                                                                                                                                                                                                                                                                                                                                                                                                                                                                                                                                                                                                                                                                                                       |
|-------------------------------|-----------------------------------------------------------------------------------------------------------------------------------------------------------------------------------------------------------------------------------------------------------------------------------------------------------------------------------------------------------------------------------------------------------------------------------------------------------------------------------------------------------------------------------------------------------------------------------------------------------------------------------------------------------------------------------------------------------------------------------------------------------------------------------------------------------------------------------------------------------------------------------------------------------------------------------------------------------------------------------------------------------------------------------------------------------------------------------------------------------------------|
| Journal:                      | <i>BMJ Open</i>                                                                                                                                                                                                                                                                                                                                                                                                                                                                                                                                                                                                                                                                                                                                                                                                                                                                                                                                                                                                                                                                                                       |
| Manuscript ID                 | bmjopen-2019-036097                                                                                                                                                                                                                                                                                                                                                                                                                                                                                                                                                                                                                                                                                                                                                                                                                                                                                                                                                                                                                                                                                                   |
| Article Type:                 | Original research                                                                                                                                                                                                                                                                                                                                                                                                                                                                                                                                                                                                                                                                                                                                                                                                                                                                                                                                                                                                                                                                                                     |
| Date Submitted by the Author: | 02-Dec-2019                                                                                                                                                                                                                                                                                                                                                                                                                                                                                                                                                                                                                                                                                                                                                                                                                                                                                                                                                                                                                                                                                                           |
| Complete List of Authors:     | Rua, Tiago; King's College London, King's Health Economics; Guy's and Saint Thomas' NHS Foundation Trust, Clinical Imaging and Medical Physics<br>Mazumder, Asif; Guy's & St Thomas' Hospitals NHS Foundation Trust, Neuroradiology Group, Department of Radiology, Lambeth Wing<br>Akande, Yvonne; Guy's and Saint Thomas' NHS Foundation Trust, Clinical Imaging and Medical Physics<br>Margariti, Charikleia; King's College London<br>Ochulor, Juliana; Guy's and Saint Thomas' NHS Foundation Trust, Neurology Department<br>Turville, Joanna; Guy's and Saint Thomas' NHS Foundation Trust, Clinical Imaging and Medical Physics<br>Razavi, Reza; King's College London, Imaging Science Division<br>Peacock, Janet; King's College London, Division of Primary Care and Public Health Sciences<br>McCrone, Paul; King's College London,<br>Goh, Vicky; King's College London, School of Biomedical Engineering and Imaging Sciences<br>Shearer, James; King's College London, i. Primary Care and Public Health Sciences<br>Afridi, Shazia; Guy's and Saint Thomas' NHS Foundation Trust, Neurology Department |
| Keywords:                     | Migraine < NEUROLOGY, RADIOLOGY & IMAGING, Head & neck imaging < RADIOLOGY & IMAGING, Magnetic resonance imaging < RADIOLOGY & IMAGING, HEALTH ECONOMICS                                                                                                                                                                                                                                                                                                                                                                                                                                                                                                                                                                                                                                                                                                                                                                                                                                                                                                                                                              |
|                               |                                                                                                                                                                                                                                                                                                                                                                                                                                                                                                                                                                                                                                                                                                                                                                                                                                                                                                                                                                                                                                                                                                                       |

SCHOLARONE™  
Manuscripts

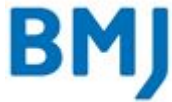

I, the Submitting Author has the right to grant and does grant on behalf of all authors of the Work (as defined in the below author licence), an exclusive licence and/or a non-exclusive licence for contributions from authors who are: i) UK Crown employees; ii) where BMJ has agreed a CC-BY licence shall apply, and/or iii) in accordance with the terms applicable for US Federal Government officers or employees acting as part of their official duties; on a worldwide, perpetual, irrevocable, royalty-free basis to BMJ Publishing Group Ltd ("BMJ") its licensees and where the relevant Journal is co-owned by BMJ to the co-owners of the Journal, to publish the Work in this journal and any other BMJ products and to exploit all rights, as set out in our [licence](#).

The Submitting Author accepts and understands that any supply made under these terms is made by BMJ to the Submitting Author unless you are acting as an employee on behalf of your employer or a postgraduate student of an affiliated institution which is paying any applicable article publishing charge ("APC") for Open Access articles. Where the Submitting Author wishes to make the Work available on an Open Access basis (and intends to pay the relevant APC), the terms of reuse of such Open Access shall be governed by a Creative Commons licence – details of these licences and which [Creative Commons](#) licence will apply to this Work are set out in our licence referred to above.

Other than as permitted in any relevant BMJ Author's Self Archiving Policies, I confirm this Work has not been accepted for publication elsewhere, is not being considered for publication elsewhere and does not duplicate material already published. I confirm all authors consent to publication of this Work and authorise the granting of this licence.

1  
2  
3 **The management of chronic headache with referral from primary care to direct**  
4 **access to Magnetic Resonance Imaging (MRI) compared to Neurology services: an**  
5 **observational prospective study.**  
6  
7  
8  
9

10  
11 Tiago Rua<sup>1,2</sup>, Asif A. Mazumder<sup>2</sup>, Yvonne Akande<sup>2</sup>, Charikleia Margariti<sup>2</sup>, Juliana Ochulor<sup>3</sup>, Joanna  
12 Turville<sup>2</sup>, Reza Razavi<sup>2,4</sup>, Janet L. Peacock<sup>5</sup>, Paul McCrone<sup>1</sup>, Vicky Goh<sup>2,6</sup>, James Shearer<sup>1</sup>, Shazia.K.  
13 Afridi<sup>3</sup>  
14

15  
16  
17 <sup>1</sup> King's Health Economics, King's College London, London, UK  
18

19  
20 <sup>2</sup> Department of Clinical Imaging and Medical Physics, Guy's and St Thomas' NHS Foundation Trust,  
21 London, UK  
22

23  
24 <sup>3</sup> Department of Neurology, Guy's and St Thomas' NHS Foundation Trust, London, UK  
25

26  
27 <sup>4</sup> Vice President & Vice-Principal (Research), King's College London, London, UK  
28

29  
30 <sup>5</sup> School of Population Health and Environmental Sciences, King's College London, London, UK  
31

32  
33 <sup>6</sup> Cancer Imaging, School of Biomedical Engineering and Imaging Sciences, King's College London,  
34 London, UK  
35  
36  
37  
38  
39  
40  
41  
42  
43  
44  
45  
46  
47  
48  
49  
50  
51  
52  
53  
54  
55  
56  
57  
58  
59  
60

1  
2  
3 Tiago Rua, Health Technology Analyst, King's Health Economics, King's College London, London, UK;  
4 Clinical Imaging and Medical Physics Directorate, Guy's and St Thomas' NHS Foundation Trust, London,  
5 UK. E-mail: [tiago.rua@kcl.ac.uk](mailto:tiago.rua@kcl.ac.uk)  
6  
7

8 Asif A. Mazumder, Consultant Neuroradiologist, Guy's and St Thomas NHS Trust, London, UK; Honorary  
9 Senior Clinical Lecturer, King's College London, London, UK. E-mail: [asif.mazumder@gstt.nhs.uk](mailto:asif.mazumder@gstt.nhs.uk)  
10

11 Yvonne Akande, Project Manager, Guy's and St Thomas NHS Trust, London, UK. Email:  
12 [yvonne.akande@kcl.ac.uk](mailto:yvonne.akande@kcl.ac.uk)  
13  
14

15 Charikleia Margariti, Research Assistant, School of Biomedical Engineering and Imaging Sciences, King's  
16 College London, London, UK. E-mail: [charikleia.margariti@kcl.ac.uk](mailto:charikleia.margariti@kcl.ac.uk)  
17

18 Juliana Ochulor, Clinical Nurse Specialist, Guy's and St Thomas NHS Trust, London, UK. E-mail:  
19 [juliana.ochulor@gstt.nhs.uk](mailto:juliana.ochulor@gstt.nhs.uk)  
20  
21

22 Joanna Turville, Project Director, Department of Clinical Imaging and Medical Physics, Guy's and St  
23 Thomas' NHS Foundation Trust, London, UK. E-mail: [joanna.turville@gstt.nhs.uk](mailto:joanna.turville@gstt.nhs.uk)  
24  
25

26 Reza Razavi, Vice President & Vice-Principal (Research), King's College London, London, UK. E-mail:  
27 [reza.razavi@kcl.ac.uk](mailto:reza.razavi@kcl.ac.uk)  
28

29 Janet L. Peacock, Professor of Medical Statistics, School of Population Health and Environmental  
30 Sciences, King's College London, London, UK. E-mail: [janet.peacock@kcl.ac.uk](mailto:janet.peacock@kcl.ac.uk)  
31  
32

33 Paul McCrone, Professor in Health Economics, King's Health Economics, King's College London, London,  
34 UK. E-mail: [p.mccrone@greenwich.ac.uk](mailto:p.mccrone@greenwich.ac.uk)  
35  
36

37 Vicky Goh, Professor of Clinical Cancer Imaging; Honorary Consultant Radiologist, Clinical Imaging and  
38 Medical Physics Directorate, Guy's and St Thomas' NHS Foundation Trust, London, UK; Cancer Imaging,  
39 School of Biomedical Engineering and Imaging Sciences, King's College London, London, UK. E-mail:  
40 [vicky.goh@kcl.ac.uk](mailto:vicky.goh@kcl.ac.uk)  
41  
42

43 James Shearer, Lecturer in Health Economics, King's Health Economics, King's College London, London,  
44 UK. E-mail: [james.shearer@kcl.ac.uk](mailto:james.shearer@kcl.ac.uk)  
45  
46

47 Shazia K Afridi, Consultant Neurologist, Guy's and St Thomas' NHS Trust; Visiting Senior Lecturer, King's  
48 College London, London, UK. E-mail: [shazia.afridi@gstt.nhs.uk](mailto:shazia.afridi@gstt.nhs.uk)  
49  
50  
51  
52  
53

54 **Corresponding author:** Tiago Rua, 5<sup>th</sup> floor Becket House, 1 Lambeth Palace Road, London SE1 7EU. E-  
55 mail: [tiago.rua@kcl.ac.uk](mailto:tiago.rua@kcl.ac.uk). Contact number: 020 7188 9529  
56  
57

1  
2  
3 **Author contributions:**  
4

5 **Conception and design:** T. Rua, A. A. Mazumder, Y. Akande, J. Turville, R. Razavi, JL. Peacock, P.  
6 McCrone, S. K. Afridi  
7

8  
9 **Acquisition of data:** T. Rua, Y. Akande, C. Margariti, J Ochulor  
10

11 **Analysis and interpretation of data:** T. Rua, JL. Peacock, P. McCrone, J. Shearer  
12

13 **Drafting the manuscript:** T. Rua, A. A. Mazumder, JL. Peacock, P. McCrone, V. Goh, J. Shearer, S. K.  
14 Afridi  
15

16  
17 **Final approval of the completed manuscript:** T. Rua, A. A. Mazumder, Y. Akande, C. Margariti, J.  
18 Turville, R. Razavi, JL. Peacock, P. McCrone, V. Goh, J. Shearer, S. K. Afridi  
19  
20

21  
22  
23  
24 **Acknowledgements:** The authors would like to thank all patients and staff members at Guy's and St  
25 Thomas' NHS Trust, particularly neurology and radiology consultants, for making this study possible.  
26

27  
28 **Conflict of interests:** The authors declare no conflict of interests.  
29  
30  
31  
32  
33  
34  
35  
36  
37  
38  
39  
40  
41  
42  
43  
44  
45  
46  
47  
48  
49  
50  
51  
52  
53  
54  
55  
56  
57  
58  
59  
60

## Abstract

**Objectives.** To evaluate the cost, accessibility and patient satisfaction implications of two clinical pathways used in the management of chronic headache.

**Intervention.** Management of chronic headache following referral from Primary Care that differed in the first appointment, either a Neurology appointment or an MRI brain scan.

**Design and setting.** A pragmatic, non-randomised, prospective, single-center study at a Central Hospital in London.

**Participants.** Adult patients with chronic headache referred from Primary to Secondary Care.

**Primary and secondary outcome measures.** Participants' use of health care services and costs were estimated using primary and secondary care databases and questionnaires quarterly up to 12 months post-recruitment. Cost analyses were compared using generalised linear models (GLM). Secondary outcomes assessed: access to care, patient satisfaction, headache burden and self-perceived quality of life using headache-specific (MIDAS, HIT-6) and a generic questionnaire (EQ-5D-5L).

**Results.** Mean (SD) cost up to 6 months post-recruitment per participant was £578 (£420) for the Neurology group (n=128) and £245 (£172) for the MRI group (n=95), leading to an estimated mean cost difference of £333 (95% CI £253 to £413,  $p<0.001$ ). The mean cost difference at 12 months increased to £518 (95% CI £401 to £637,  $p<0.001$ ). When adjusted for baseline and follow-up imbalances between groups, this remained statistically significant. The utilisation of brain MRI improved access to care compared to the Neurology group ( $p<0.001$ ). Participants in the Neurology group reported higher levels of satisfaction associated with the pathway and led to greater change in care management.

**Conclusion.** Direct referral to brain MRI from Primary Care led to cost-savings and quicker access to care but lower satisfaction levels when compared with referral to Neurology services. Further research into the use of brain MRI for a subset of patient population more likely to be reassured by a negative brain scan should be considered.

**Keywords:** Chronic headache; migraine; direct access; magnetic resonance imaging; cost analysis.

**Funding:** This work was supported by the Guy's and St Thomas' Charity.

#### Strengths and limitations of this study

- The estimate of health care resource use was based on comprehensive and complete data retrieved from hospital databases supplemented by both primary care utilisation data and self-reported participant data. Any chronic headache related event was costed regardless of the healthcare provider and location.
- The evaluation of the intervention's impact across different dimensions of analysis (efficiency, quality of care, access to care and patient satisfaction).
- This was a single-centre study with participants recruited from one central hospital in London. A multi-centre study would be necessary to explore the generalisability of the results.



## Introduction

Globally, the percentage of the adult population with an active headache disorder is 47% for episodic headache and 3% for chronic headache (lasting more than 15 days per month) [1]. Headache is in the top ten international causes of disability [2], with nearly half of sufferers reporting it affects work, home or social activities [3–5]. Most headaches are primary headache disorders, such as migraine or tension-type headaches. Secondary headaches, due to an underlying serious pathology (e.g. tumour, brain aneurysm) are far less common [6]. In fact, less than 0.1% of the lifetime headache prevalence is associated with a life-threatening condition, which can include primary or secondary brain tumours [2,3].

Most headache sufferers self-manage, but over 4% of adults each year consult their General Practitioner (GP) [7,8]. GPs manage 97% of headache presentations, with 2% of these referred to neurologists and 1% to other specialists [7]. Headache is the most common cause for GP referrals to neurologists accounting for up to 20-30% [9–12], the vast majority of these are for migraine. Chronic migraine sufferers (>15 days/month) had more emergency department/hospital visits, and diagnostic tests than those with episodic migraine and consequently the medical costs were three times higher [13]. Hence, despite the benign nature of most headaches, headache management is associated with high health care utilisation. Between 2012 and 2014, patients presenting to headache specialists (either neurologists or GPs with special interest in headache) costed £959 million in the UK [12].

GP direct access to imaging has been defined as a priority within the National Health Service (NHS), with direct access to brain Magnetic Resonance Imaging (MRI) for the diagnosis of brain cancer identified as a specific initiative [8]. GPs have reported referrals for secondary care, both for a neurologist consultation or neuroimaging, when they were unable to reassure the patient [14,15]. Furthermore, Morgan et al. (2007) found that referral for headache is often the outcome of patient pressure and anxiety interacting with GP characteristics, organisational factors and service availability rather than the headache severity itself [14]. This contrasts with the recommendations from the National Institute for Health and Care Excellence (NICE) that does not recommend the use of neuroimaging for reassurance purposes [16]. A US study estimated that patients with new onset migraine headache or a flare-up of chronic headache had, respectively, a 39% (95% CI 24–54%) and 51% (95% CI 32–68%) probability of having neuroimaging routinely ordered even where guidelines specifically recommended against this approach [17]. A UK-based randomised controlled trial evaluated the cost implications of using brain MRI for reassurance purposes and found that it led to a decrease in health care costs, in particular for patients with higher levels of psychiatric morbidity [18].

In summary, despite proportionately low level of referrals to secondary care, high prevalence makes headache the most frequently listed reason for referral to neurologists and thus, utilises capacity that is severely constrained. The potential decrease of referral rates to Neurology specialists as a result of direct access to imaging holds the potential release resources. On the other hand, direct access may be associated with a transfer of workload to Radiology, as not all patients directly referred to brain MRI would

1  
2  
3 routinely undergo an MRI scan as part of the management of their chronic headache. This study aims to  
4 evaluate the health care utilisation and associated costs of GPs using direct access to brain MRI for the  
5 management of chronic headache patients compared to referral to a Neurologist.  
6  
7

## 8 **Patients and Methods**

9

### 10 Study design and patient selection

11  
12  
13 The study was an independent single-centre site, prospective, observational study. The study compared  
14 two existing clinical pathways in the management of patients with chronic headache from either GP referral  
15 to the Neurology Department or to direct access to brain MRI. No change to clinical practice was involved.  
16 Participants were allocated to two groups, the Neurology group or the MRI group. The allocation was  
17 decided *a priori*, i.e. the referrer (in this case the GP) decided which referral route would suit each  
18 participant. Subsequent care was consistent with standard of care for each clinical pathway and depicted  
19 in Figure 1.  
20  
21  
22

23  
24 Patients eligible for the study included adults aged 16 years or over with chronic headache defined as  
25 occurring  $\geq 15$  days per month for more than 3 months and referred from GP practices to a local Hospital  
26 in Central London, either for a Neurology outpatient appointment or an MRI exam. Participants were  
27 excluded if there were secondary causes for the headache, if they were prisoners, lacked capacity to give  
28 consent or participate in the study, not fluent in English or already taking part in a clinical trial of an  
29 investigational medicinal product. Following eligibility assessment, participants completed a written  
30 informed consent. The Health Research Authority and Research Ethics Committee (West of Scotland –  
31 REC 4) approved the study research on 12<sup>th</sup> April 2016 (REC reference 16/WS/0028).  
32  
33  
34  
35

36 This study has involved Patient and Public Involvement (PPI) during the design and dissemination phase.  
37 Prior to the start of the research, a group of patients suffering from chronic headache were consulted to co-  
38 produce the study mobile app that was used to monitor symptoms and triggers of chronic headache. The  
39 patients who were involved in the study design, as well as all study participants, will receive a lay summary  
40 of the research findings as per their preferences, either via post or e-mail.  
41  
42  
43

### 44 Study outcomes

45  
46 The primary outcome was to estimate the 6-month health care costs associated with two existing clinical  
47 pathways in the management of chronic headaches. Secondary outcomes comprised: the extension of the  
48 cost analysis up to 12 months, the evaluation of access to care, patient satisfaction, headache burden and  
49 time off work associated with both clinical pathways.  
50  
51  
52

### 53 Service use costs

54  
55  
56  
57  
58  
59  
60

1  
2  
3 Total costs were calculated based on the multiplication of any headache-related healthcare events by the  
4 unit cost of each event. Resource use data included contacts with any NHS healthcare provider associated  
5 with the management of chronic headache. These included, among others, visits to GPs or headache  
6 clinical nurse specialist, inpatient care, neurologist or other headache-related outpatient visits (e.g.  
7 psychiatry), physiotherapist, visits to the Emergency Department (ED), advanced imaging such as  
8 Computed Tomography (CT) and MRI. Resource use data was retrieved from multiple hospital and primary  
9 care databases as well as self-reported data from participants using a participant headache diary (either  
10 paper-based or a headache mobile app). For the purposes of the primary outcome, the valuation of unit  
11 costs was, whenever possible, based on NHS Reference Costs 2016-17 [19]. Medication costs were  
12 derived from Prescription Cost Analysis [20] and estimated from clinical data, specifically secondary care  
13 clinic letters and information provided by primary care. Participants were also asked to record time off work  
14 due to headache using the weekly participant diary.  
15  
16  
17  
18  
19  
20  
21

### 22 Quality of life and headache burden

23  
24 Headache burden was assessed using validated headache questionnaires and headache diaries. The HIT-  
25 6 questionnaire measured the headache burden based on 6 questions, leading to a score range from 36 to  
26 78. The MIDAS questionnaire assessed the disability associated with the headache (ranges from 0 to 90).  
27 Furthermore, along with the headache diaries completed by participants, the MIDAS questionnaire allowed  
28 the estimate of the number of headache days per quarter (maximum of 90 days) and self-reported  
29 headache pain scores (ranging from 0, no pain at all, to 10, the worst pain ever).  
30  
31  
32  
33

### 34 Access to care

35  
36 The time elapsed between the GP referral and the first appointment in each group, either the Neurology  
37 appointment or the MRI scan, was measured as a proxy for access to care. Furthermore, in the MRI group,  
38 the availability of the MRI report to the GP, rather than the actual timing of the diagnostic scan, was  
39 considered.  
40  
41  
42  
43

### 44 Change in care management

45  
46 Change in care management in both groups was evaluated. It was considered that a change in care  
47 management occurred when patients underwent new treatment options (medication or otherwise, e.g. new  
48 headache medication, Botox treatment).  
49  
50  
51

### 52 Patient satisfaction

53  
54 Patient satisfaction was evaluated at month 3 post-recruitment using a non-validated questionnaire. This  
55 questionnaire evaluated three dimensions of analysis: (a) referral process (time elapsed between referral  
56  
57

1  
2  
3 from primary care to initial secondary care appointment); (b) initial appointment; and (c) overall experience  
4 three months after recruitment.  
5

### 6 7 Statistical analyses

8  
9 This study was observational but all analyses were based on the principle of 'intention-to-treat' so that  
10 participants recruited were included in the analysis as per the group they were recruited to, regardless of  
11 whether they actually received the intended treatment, any protocol deviations or potential losses to follow-  
12 up [21]. Given the study's time horizon of 12 months, no discounting of costs or effects were considered.  
13 Descriptive statistics on several socio-demographics baseline characteristics were included. Differences in  
14 baseline characteristics between treatment groups were compared using statistical tests: Chi-squared for  
15 categorical data, t test for Normal data and Mann-Whitney for non-Normal quantitative data. Given the  
16 skewness associated with the cost distribution, all cost differences between groups were assessed using  
17 generalised linear models (GLM) with an identity-link and gamma distribution. An identity link function  
18 instead of a log link was considered in order to avoid potential analytical biases [22,23]. An unadjusted GLM  
19 cost analysis with the study group (MRI group vs Neurology group) as only univariate analysis was  
20 performed as the first step. Given the study's observational design, the cost difference can be impacted  
21 due to the lack of randomisation [24]. Baseline variables that differed between the two groups ( $p < 0.1$ )  
22 were included in the multivariable (adjusted) GLM analyses. For all GLM analyses, group difference  
23 estimates and associated confidence intervals were reported, together with p-values. Analyses were  
24 conducted using Stata version 15.  
25  
26  
27  
28  
29  
30  
31  
32  
33

### 34 Sample size

35  
36 The sample size estimate was calculated based on the primary endpoint, total 6-month health care costs.  
37 A total of 150 participants were recruited in the Neurology group and 99 participants in the MRI group to  
38 achieve a detection a cost difference of £300 assuming standard deviations of £750 and £500, respectively,  
39 with 85% power at the 5% two-sided significance level. A 20% increase in sample size due to unknown  
40 cost distribution and attrition rate was considered.  
41  
42  
43  
44

## 45 **Results**

46  
47 A total of 249 participants were recruited, 150 in the Neurology group and 99 in the MRI group. 100%  
48 ( $n=128$ ) and 97% ( $n=96$ ) of participants recruited received the treatment allocation in the Neurology and  
49 the MRI group, respectively (Figure 2). With regards to the follow-up duration, 15% ( $n=22$ ) and 4.0% ( $n=4$ )  
50 participants withdrew from the Neurology and MRI group, respectively, and were considered lost to follow-  
51 up. Remaining participants ( $n=223$ ) were included in the analysis, equivalent to 128 (85%) and 95 (96%)  
52 participants in the Neurology and MRI group, respectively.  
53  
54  
55  
56  
57

1  
2  
3 Baseline socio-demographic, clinical variables and resource use in the twelve months pre-recruitment are  
4 detailed in Table 1. A higher proportion of females were recruited to the Neurology group compared to the  
5 MRI group (81% vs 68%,  $p=0.039$ ). Both groups were similar in mean age, ethnic mix, with more than half  
6 being White. No significant differences between the groups were found in terms of highest qualification and  
7 employment, with high-school and full-time employment being the most common. In terms of clinical  
8 variables, no significant difference between groups were found in terms of number of active health problems  
9 or number of headache triggers. Participants in the Neurology group reported lower utility and health scores  
10 using the generic EQ-5D-5L questionnaire, with a statistically significant difference in health scores  
11 ( $p=0.005$ ). Lower health scores imply lower self-rated quality of life, while for the headache-specific  
12 questionnaires [Headache Impact Test (HIT-6) and Migraine Disability Assessment (MIDAS)], a higher  
13 score implies a higher headache burden. Compared to the MRI group, participants in the Neurology group  
14 reported significantly higher headache burden (HIT-6 mean score: 65 vs 63,  $p=0.006$ ), number of headache  
15 days in the past 3 months (MIDAS questionnaire: 52 vs 43,  $p=0.038$ ). Participants in the Neurology group  
16 also had significantly more primary care appointments (3.7 vs 2.4,  $p<0.001$ ) and all NHS appointments (4.3  
17 vs 2.5,  $p<0.001$ ).

#### 26 Service use

27  
28 Table 2 summarises the NHS resource use of primary care and hospital-based services over a period of  
29 12 months following recruitment. With regards to primary care utilisation, participants in the Neurology  
30 group had a significantly higher number of GP face-to-face appointments (mean number per participant:  
31 1.82 vs 1.19,  $p=0.006$ ). Regarding secondary care, participants in the Neurology group had a higher mean  
32 number of outpatient appointments (2.52 vs 0.26,  $p<0.001$ ) and other treatments such as Botox and nerve  
33 root injection (mean 0.30 vs 0.05,  $p<0.001$ ). In contrast, they had a lower mean number of brain MRIs (0.59  
34 vs 1.05,  $p<0.001$ ). There were no statistically significant differences in the utilisation levels of any of the  
35 other healthcare events.

36  
37  
38  
39  
40 The NHS resource use pre and post-recruitment for both groups was also compared. Table 3 summarises  
41 the difference between headache-related events 12 months post-recruitment compared to the 12 months  
42 pre-recruitment. A reduction of 197 and 87 GP visits (mean 1.54/0.92 per participant or a percentage  
43 reduction of 85%/77%) was noted in the Neurology and MRI group, respectively. Similarly, there was a  
44 reduction in emergency department utilisation with a decrease of 23 and 6 episodes (mean 0.18 and 0.07  
45 per participant or a percentage reduction of 288% and 120%) in the Neurology and MRI group, respectively.

#### 51 Cost analyses

52  
53 The mean (SD) cost management per participant at 6 months post-recruitment was lower in the MRI group  
54 compared to the Neurology group [£245 (£172) vs £578 (£420)], leading to a mean cost difference between  
55 groups of -£333 per participant (95% CI: -£413 to -£253,  $p<0.001$ ). The MRI group had a higher proportion  
56  
57

1  
2  
3 of participants with lower costs (£0 to £250 range) than the Neurology group (73% vs 4.7%). The initial cost  
4 analysis was extended to 12 months post-recruitment and the mean cost difference between groups  
5 increased, with the MRI group generating cost savings of £518 per participant (95% CI: -£637 to -£401,  
6  $p < 0.001$ ).  
7  
8

9  
10 Given the non-randomised study design, an additional GLM analysis was performed to adjust for baseline  
11 characteristics. The unadjusted 6-month cost difference between groups (-£333; 95% CI: -£413, -£253)  
12 hardly changed after adjustment (-£308; 95% CI: -£408, -£209). In all analyses, at both 6 and 12 months  
13 post-recruitment, direct access to MRI for the management of chronic headache was associated with  
14 statistically significant mean cost savings for the NHS.  
15  
16

### 17 18 19 Abnormal findings in the MRI group

20  
21 Out of the 95 participants recruited in the MRI group, three MRIs were not performed during the initial  
22 appointment due to claustrophobia events. From a total number of 92 MRIs, 85 (92%) were normal and 7  
23 (7.6%) presented abnormal findings (Table 4), with one diagnosis being particularly significant (two small  
24 intracranial aneurysms). This participant was referred to neurovascular team for assessment, at which point  
25 no intervention was performed during the follow-up period (participant included in an active surveillance  
26 group). Two other participants had a change in their clinical management for less significant findings,  
27 leading to either a follow-up appointment or scan. No brain malignancies were diagnosed.  
28  
29  
30

### 31 32 33 Access to care

34  
35 The mean time (SD) elapsed from GP referral to the initial Neurology and MRI scan was, respectively, 110  
36 (35) days and 39 days (17), a statistically significant difference ( $p < 0.001$ ). Second, if the MRI report, than  
37 the actual scan, is considered as a proxy for access to care, the mean time elapsed was 70 days (35)  
38 ( $p < 0.001$ ).  
39  
40

### 41 42 43 Change in management

44  
45 Participants in the Neurology group were more likely to have a change in therapeutic management  
46 compared to participants in the MRI group (97% vs 64%,  $p < 0.001$ ). Similarly, among participants that had  
47 not started on preventative medication pre-recruitment, a higher proportion of participants in the Neurology  
48 group were started on preventative medication as part of their clinical management (93% vs 53%,  $p < 0.001$ ).  
49  
50

### 51 52 53 Quality of life and headache burden

54  
55 At baseline, mean utility was lower in the Neurology group but not significant (mean utility of 0.809 vs 0.830,  
56  $p = 0.097$ ), while their self-perceived mean health score was significantly lower (EQ-5D-5L: visual analogue  
57  
58  
59  
60

1  
2  
3 scale score of 64.0 vs 70.8,  $p=0.005$ ) (Table 5). There was no statistically significant differences between  
4 the groups at 6 months for to the utility and self-reported healthcare scores.  
5  
6

7 At baseline, participants in the Neurology group presented a higher headache burden compared to the MRI  
8 group (mean score of 65.0 vs 62.6,  $p=0.006$ ) (Table 5). This trend seemed to be maintained over the follow-  
9 up period but was difficult to interpret due to high attrition rates: mean HIT-6 score at 6 months (60.0 vs  
10 53.1,  $p=0.968$ ). At baseline, participants in the Neurology group had higher headache severity compared  
11 to the MRI group, but this was not significant (mean MIDAS score of 57.8 vs 44.8,  $p=0.075$ ) (Table 5). In  
12 both groups the headache severity decreased over the follow-up period. At baseline, participants in the  
13 Neurology group reported a significantly higher mean number of headache days compared to the MRI  
14 group (51.6 vs 42.8,  $p=0.038$ ). This trend was observed at month 6 but was not significant (41.2 vs 26.5,  
15  $p=0.152$ ). A third variable assessed self-reported headache pain scores. At baseline, participants at  
16 baseline showed almost identical mean headache pain scores (6.9 vs 6.9,  $p=0.827$ ). During the follow-up  
17 period, no statistical differences were found at month 6 (4.5 vs 4.2,  $p=0.663$ ).  
18  
19  
20  
21  
22  
23

#### 24 Time off work

25  
26  
27 Participants in the Neurology group ( $n=83$ ) had higher mean number of days off work due to headache  
28 compared to participants in the MRI group ( $n=35$ ) but these were not statistically significant at 6 (13.9 vs  
29 9.7,  $p=0.563$ ) or 12 months (27.9 vs 19.1,  $p=0.808$ ) post-recruitment.  
30  
31  
32

#### 33 Patient satisfaction

34  
35 Patient satisfaction was evaluated at month 3 post-recruitment using a non-validated questionnaire  
36 (Appendix I). Participants in both groups reported no difference in terms of receiving an appointment in a  
37 suitable timeframe ( $p=0.193$ ). Participants in the MRI group reported higher satisfaction levels ( $p=0.005$ )  
38 compared to the Neurology group associated with the information received prior to the actual appointment.  
39 No statistically significant difference ( $p=0.366$ ) between the groups was found regarding the satisfaction  
40 levels of both appointments (either MRI scan or Neurologist appointment) but a higher proportion of  
41 participants in the Neurology group reported a better experience compared to their expectation ( $p=0.002$ ).  
42 At month 3 post-recruitment in all variables, except frequency of appointments ( $p=0.166$ ), participants in  
43 the Neurology group reported higher levels of satisfaction with: amount of time spent with clinical staff  
44 ( $p=0.001$ ); consistency of care ( $p=0.028$ ); how informed you felt about your condition ( $p=0.010$ ) / your  
45 treatment ( $p=0.004$ ); and the overall experience ( $p<0.001$ ).  
46  
47  
48  
49  
50  
51  
52

## 53 **Discussion**

1  
2  
3 Previous UK studies assessed the use of direct access to advanced imaging in the management of chronic  
4 headache patients [9,18]. Howard et al. (2005) performed a randomised controlled trial, which showed that  
5 the use of imaging in patients led to a reduction of referral rates to Neurology services in secondary care  
6 from 23% to 1.3% (1/76) in the treatment group (i.e. patients being scanned) [18]. Thomas et al. (2010)  
7 estimated that direct access to brain imaging, in this case CT, reduced referral rates to Neurology in 86%  
8 of the cases during the follow-up period (average of 1.3 years per patient) [9].  
9  
10  
11  
12

13 The study's underlying hypothesis was that the early use of an advanced and accurate diagnostic tool (in  
14 this case MRI) would reassure both patients and GPs that no serious underlying cause (particularly brain  
15 tumour) is present. This would in turn reduce the headache burden and NHS resource use associated with  
16 the patient's subsequent management. Given the high prevalence of headache and the increased referral  
17 of patients with chronic headaches and other neurological conditions from primary care to hospital based  
18 care [7], it is relevant to assess the implications of using different management strategies. To our  
19 knowledge, no previous prospective study in the UK has assessed the economic implications of these two  
20 coexisting management strategies based on GP referral decision.  
21  
22  
23  
24  
25

26 The primary outcome was total costs at six months post-recruitment. The study showed that the use of  
27 advanced imaging produced cost-savings to the NHS compared to referral to Neurology, with mean cost-  
28 savings per participant of £333 and £518 at month 6 and 12 post-recruitment, respectively ( $p<0.001$ ). These  
29 cost differences were multifactorial but primarily driven by: (i) the lower unit cost of a brain MRI scan (£146)  
30 compared to the initial Neurology appointment (£240); (ii) the lower number of outpatient appointments in  
31 the MRI group (25 vs 322); (iii) the fact that 75/128 (59%) of participants in the Neurology group ended up  
32 having a brain MRI scan in the 12-month period of follow-up; and (iv) the increased likelihood of patients in  
33 the Neurology arm receiving management with Botox injections or nerve block procedures (39 vs 5 events).  
34 Direct access to brain MRI seemed to reassure most participants as only 17 (18%) participants in the MRI  
35 group ended up being referred to a neurologist. Furthermore over 66% of participants in the MRI group had  
36 no further hospital-based care, compared to 5% in the Neurology group. Similarly, at primary care level,  
37 participants in the MRI group presented lower utilisation rates per participant when compared to the  
38 Neurology group (mean GP appointments of 1.82 vs 1.19,  $p=0.006$ ). All cost differences between groups  
39 remained statistically significant ( $p<0.001$ ) when adjusted for differences in baseline characteristics or  
40 follow-up attrition rates.  
41  
42  
43  
44  
45  
46  
47

48 At baseline, participants in the Neurology group presented lower self-reported quality of life and higher  
49 headache burden. HIT-6 scores did improve over time but we were unable to assess whether there was a  
50 statistically significant difference in both groups due to the high attrition rates, particularly in the MRI group.  
51 As mentioned, out of the 95 participants recruited to the MRI group, 17 (18%) were subsequently referred  
52 to a Neurologist. Interestingly, at baseline, these 17 patients reported higher headache burden compared  
53 to all 95 patients recruited to the MRI group (MIDAS score: 51.2 vs 44.8; MIDAS headache days: 55.8 vs  
54  
55  
56  
57



1  
2  
3 42.8). This finding seems to suggest that this data might be useful to risk stratify patients and support GPs  
4 in their referral criteria. However, further research into this area is required.  
5

6  
7 Participants in the Neurology group presented a higher probability of being started on a preventative  
8 medication and had a change in therapeutic management following referral from primary care. A small  
9 proportion (7.6%) of participants in the MRI group had abnormal findings in the initial brain MRI. Only one  
10 participant had clinically significant lesions (two small aneurysms) which were also incidental and no brain  
11 tumour was diagnosed.  
12  
13

14  
15 Time off work was also evaluated as a proxy of headache burden. Participants in the Neurology group  
16 presented a trend ( $p>0.05$ ) of higher number of days off work due to headache compared to participants in  
17 the MRI group. This difference was not however statistically significant.  
18  
19

20  
21 Lastly, patient satisfaction in both groups was compared based on three dimensions of analysis: during the  
22 referral period, the initial appointment and overall satisfaction. Twenty five percent of participants in the  
23 Neurology group (vs 18% in the MRI group) reported dissatisfaction with the waiting time. This finding is  
24 not unexpected as the mean waiting time associated with the Neurology appointment was almost three  
25 times of the one associated with the MRI scan (110 vs 39 days). Contrary to the referral period, participants  
26 in the Neurology group reported trends of higher satisfaction levels associated with the first appointment  
27 (neurology outpatient visit vs MRI scan) and a better experience compared to their expectations (60% vs  
28 29% in the Neurology and MRI group, respectively). Participants in the Neurology group reported improved  
29 satisfaction levels at 3 months across different variables (time spent with clinician, consistency of care,  
30 information about the condition and its treatment). Almost three quarters of Neurology participants reported  
31 being satisfied or very satisfied with their headache management compared to only 21% in the MRI group  
32 ( $p<.001$ ). Both participants and GP referrers in the MRI group reported dissatisfaction associated with the  
33 waiting time elapsed between the MRI scan and the availability of results (mean time of 31 days). This  
34 might have contributed to increased anxiety in some participants.  
35  
36  
37  
38  
39  
40

#### 41 *Strengths of this study:* 42

43  
44 The estimate of NHS resource use data was primarily based on comprehensive and complete data retrieved  
45 from hospital-based databases that captured both the acute and elective elements of the pathway  
46 associated with the management of patients with chronic headache. This data was supplemented by both  
47 primary care utilisation data, collected from each participant's GP, and self-reported participant data. The  
48 aim was to guarantee that any chronic headache related NHS event was costed regardless of the  
49 healthcare provider and its location. The prospective collection of health care utilisation and the evaluation  
50 of the impact of the interventions across different dimensions of analysis (efficiency, quality of care, access  
51 to care and patient satisfaction) were other key factors that contributed to the overall strength of the study.  
52  
53  
54  
55  
56  
57  
58  
59  
60

### Limitations of this study:

There were some limitations to this study. First, this was a single-centre study with participants recruited from one central hospital in London. A multi-centre study would be necessary to explore the generalisability of the results. Second, as with any observational study, no randomisation between groups was performed and there were significant differences in baseline of headache burden and health-scores and utilisation of resources, reflecting potential selection bias. Third, specific inclusion and exclusion criteria were considered and as such the study sample might not be representative of all patients with chronic headache. Fourth, for the purpose of secondary outcomes, most data was self-reported and hence prone to recall bias. Lastly, there were high follow-up attrition rates particularly for participants in the MRI group, which affected some of the study's secondary outcomes.

### **Conclusions**

This study found that the referral from primary care to direct access to brain MRI compared to referral for a neurologist for patients with chronic headache was associated with lower NHS overall costs at 6 and 12 months post-recruitment. Despite waiting longer from referral to appointment, participants in the Neurology group reported higher satisfaction levels associated with the care received compared to the MRI group and were more likely to benefit from changes to their therapeutic management.

### Implications for further research and clinical practice

Baseline measures of headache burden, such as the HIT-6 or MIDAS, could potentially be used to determine which pathway may be suitable for patients but further research into the risk stratification of chronic headache patients is required. With regards to clinical practice, and based on the study findings, we plan to provide GPs with headache management advice along with the MRI report.

## References

- [1] R. Jensen and L. J. Stovner, "Epidemiology and comorbidity of headache," *Lancet Neurol.*, vol. 7, no. 4, pp. 354–361, Apr. 2008.
- [2] L. Stovner *et al.*, "The global burden of headache: a documentation of headache prevalence and disability worldwide," *Cephalalgia Int. J. Headache*, vol. 27, no. 3, pp. 193–210, Mar. 2007.
- [3] H. F. Boardman, E. Thomas, P. R. Croft, and D. S. Millson, "Epidemiology of headache in an English district," *Cephalalgia Int. J. Headache*, vol. 23, no. 2, pp. 129–137, Mar. 2003.
- [4] T. Vos *et al.*, "Years lived with disability (YLDs) for 1160 sequelae of 289 diseases and injuries 1990–2010: a systematic analysis for the Global Burden of Disease Study 2010," *The Lancet*, vol. 380, no. 9859, pp. 2163–2196, Dec. 2012.
- [5] M. Leonardi and A. Raggi, "Burden of migraine: international perspectives," *Neurol. Sci. Off. J. Ital. Neurol. Soc. Ital. Soc. Clin. Neurophysiol.*, vol. 34 Suppl 1, pp. S117–118, May 2013.
- [6] B. K. Rasmussen, R. Jensen, M. Schroll, and J. Olesen, "Epidemiology of headache in a general population—a prevalence study," *J. Clin. Epidemiol.*, vol. 44, no. 11, pp. 1147–1157, 1991.
- [7] R. Latinovic, M. Gulliford, and L. Ridsdale, "Headache and migraine in primary care: consultation, prescription, and referral rates in a large population," *J. Neurol. Neurosurg. Psychiatry*, vol. 77, no. 3, pp. 385–387, Mar. 2006.
- [8] Department of Health, "Direct Access to Diagnostic Tests for Cancer: Best Practice Referral Pathways for General Practitioners." 2012.
- [9] R. Thomas, A. Cook, G. Main, T. Taylor, E. G. Caruana, and R. Swingler, "Primary care access to computed tomography for chronic headache," *Br. J. Gen. Pract.*, vol. 60, no. 575, pp. 426–430, Jun. 2010.
- [10] V. H. Patterson and T. F. Esmonde, "Comparison of the handling of neurological outpatient referrals by general physicians and a neurologist," *J. Neurol. Neurosurg. Psychiatry*, vol. 56, no. 7, p. 830, Jul. 1993.
- [11] L. Ridsdale, J. Doherty, P. McCrone, and P. Seed, "A new GP with special interest headache service: observational study," *Br. J. Gen. Pract.*, vol. 58, no. 552, pp. 478–483, Jul. 2008.
- [12] B. Osumili, P. McCrone, S. Cousins, and L. Ridsdale, "The Economic Cost of Patients With Migraine Headache Referred to Specialist Clinics," *Headache J. Head Face Pain*, vol. 58, no. 2, pp. 287–294, Feb. 2018.
- [13] L. M. Bloudek *et al.*, "Cost of healthcare for patients with migraine in five European countries: results from the International Burden of Migraine Study (IBMS)," *J. Headache Pain*, vol. 13, no. 5, pp. 361–378, Jul. 2012.
- [14] M. Morgan, L. Jenkins, and L. Ridsdale, "Patient pressure for referral for headache: a qualitative study of GPs' referral behaviour," *Br. J. Gen. Pract. J. R. Coll. Gen. Pract.*, vol. 57, no. 534, pp. 29–35, Jan. 2007.
- [15] R. Underwood, R. Kilner, and L. Ridsdale, "Primary care management of headaches and how direct-access MRI fits: a qualitative study of UK general practitioners' views," *BMJ Open*, vol. 7, no. 11, p. e018169, Nov. 2017.
- [16] NICE, "Management of headaches." 2018.
- [17] B. C. Callaghan, K. A. Kerber, R. J. Pace, L. Skolarus, W. Cooper, and J. F. Burke, "Headache neuroimaging: Routine testing when guidelines recommend against them," *Cephalalgia*, vol. 35, no. 13, pp. 1144–1152, Nov. 2015.
- [18] L. Howard *et al.*, "Are investigations anxiolytic or anxiogenic? A randomised controlled trial of neuroimaging to provide reassurance in chronic daily headache," *J. Neurol. Neurosurg. Psychiatry*, vol. 76, no. 11, pp. 1558–1564, Nov. 2005.
- [19] NHS Improvement, "Reference costs | NHS Improvement," 2017. [Online]. Available: <https://improvement.nhs.uk/resources/reference-costs/#rc1718>. [Accessed: 31-Jul-2019].
- [20] NHS Business Services Authority, "Prescription Cost Analysis (PCA) data | NHSBSA," 2018. [Online]. Available: <https://www.nhsbsa.nhs.uk/prescription-data/dispensing-data/prescription-cost-analysis-pca-data>. [Accessed: 31-Jul-2019].
- [21] S. K. Gupta, "Intention-to-treat concept: A review," *Perspect. Clin. Res.*, vol. 2, no. 3, pp. 109–112, 2011.

- 1  
2  
3 [22] L. A. Polgreen and J. M. Brooks, "Estimating Incremental Costs with Skew: A Cautionary Note,"  
4 *Appl. Health Econ. Health Policy.*, vol. 10, no. 5, pp. 319–329, Sep. 2012.  
5 [23] J. A. Barber and S. G. Thompson, "Analysis of cost data in randomized trials: an application of the  
6 non-parametric bootstrap," *Stat. Med.*, vol. 19, no. 23, pp. 3219–3236, 2000.  
7 [24] J. L. Moran, P. J. Solomon, A. R. Peisach, and J. Martin, "New models for old questions:  
8 generalized linear models for cost prediction," *J. Eval. Clin. Pract.*, vol. 13, no. 3, pp. 381–389, Jun.  
9 2007.  
10  
11  
12  
13  
14  
15  
16  
17  
18  
19  
20  
21  
22  
23  
24  
25  
26  
27  
28  
29  
30  
31  
32  
33  
34  
35  
36  
37  
38  
39  
40  
41  
42  
43  
44  
45  
46  
47  
48  
49  
50  
51  
52  
53  
54  
55  
56  
57  
58  
59  
60

For peer review only

1  
2  
3  
4  
5  
6  
7  
8  
9  
10  
11  
12  
13  
14  
15  
16  
17  
18  
19  
20  
21  
22  
23  
24  
25  
26  
27  
28  
29  
30  
31  
32  
33  
34  
35  
36  
37  
38  
39  
40  
41  
42  
43  
44  
45  
46  
47  
48  
49  
50  
51  
52  
53  
54  
55  
56  
57  
58  
59  
60

Figure 1. High-level illustration of two existing clinical pathways associated with the referral from GP due to chronic headache.

Figure 2. Participant flow chart for the headache study.

For peer review only

Table 1. Baseline characteristics of the population analysed.

| Variable                                             | Neurology group (n=128) | MRI group (n=95) | p-value |
|------------------------------------------------------|-------------------------|------------------|---------|
| Age, years: mean (SD)                                | 38.4 (14.1)             | 40.0 (14.6)      | 0.514   |
| Gender Female, n (%)                                 | 103 (81)                | 65 (68)          | 0.039   |
| Ethnicity                                            |                         |                  | 0.079   |
| Asian                                                | 13 (10)                 | 6 (6.3)          |         |
| Black                                                | 40 (31)                 | 17 (18)          |         |
| White                                                | 68 (53)                 | 60 (63)          |         |
| Mixed                                                | 5 (3.9)                 | 8 (8.4)          |         |
| Other                                                | 2 (1.6)                 | 4 (4.2)          |         |
| Qualification, n (%)                                 |                         |                  | 0.565   |
| Advanced work or PhD                                 | 3 (2.3)                 | 4 (4.2)          |         |
| Master's Degree                                      | 15 (12)                 | 12 (13)          |         |
| Bachelor's Degree                                    | 31 (24)                 | 29 (31)          |         |
| High School                                          | 57 (45)                 | 33 (35)          |         |
| Did not finish High School                           | 8 (6.3)                 | 10 (11)          |         |
| Prefer not to answer                                 | 14 (11)                 | 7 (7.4)          |         |
| Employment, n (%)                                    |                         |                  | 0.839   |
| Employee in full time job (30 hours or more a week)  | 50 (39)                 | 36 (38)          |         |
| Employee in part-time job (under 30 hours a week)    | 18 (14)                 | 18 (19)          |         |
| Self-employed, full or part time                     | 12 (9.4)                | 8 (8.4)          |         |
| Full-time education at school, college or university | 16 (13)                 | 9 (9.5)          |         |
| Doing something else                                 | 2 (1.6)                 | 2 (2.1)          |         |
| Permanently sick/ disabled                           | 8 (6.3)                 | 6 (6.3)          |         |
| Looking after the home                               | 4 (3.1)                 | 6 (6.3)          |         |
| Unemployed and available for work                    | 12 (9.4)                | 6 (6.3)          |         |
| Wholly retired from work                             | 4 (3.1)                 | 4 (4.2)          |         |
| Prefer not to answer                                 | 2 (1.6)                 | 0 (0)            |         |
| Presence of mental health condition, n (%)           | 22 (17)                 | 11 (12)          | 0.243   |
| Number of active health problems: mean (SD)          | 2.0 (1.5)               | 1.8 (1.4)        | 0.277   |
| Number of headache triggers: mean (SD)               | 2.1 (1.8)               | 1.8 (1.4)        | 0.378   |
| Self-reported questionnaires                         |                         |                  |         |
| EQ-5D-5L: mean utility (SD)                          | 0.809 (0.182)           | 0.830 (0.195)    | 0.097   |
| EQ-5D-5L: mean score (SD)                            | 64 (19)                 | 71 (20)          | 0.005   |
| HIT-6: mean score (SD)                               | 65 (5.3)                | 63 (7.3)         | 0.006   |
| MIDAS, mean score (SD)                               | 58 (54)                 | 45 (45)          | 0.075   |
| MIDAS, mean headache days (SD)                       | 52 (32)                 | 43 (31)          | 0.038   |
| MIDAS, mean pain score (SD)                          | 6.9 (1.8)               | 6.9 (1.9)        | 0.778   |
| Resource use in the 12 months prior to recruitment   |                         |                  |         |
| GP appointments: mean (SD)                           | 3.7 (2.9)               | 2.4 (1.5)        | <0.001  |
| All NHS events: mean (SD)                            | 4.3 (3.7)               | 2.5 (1.5)        | <0.001  |

SD= Standard deviation; EQ-5D-5L - 5 level EQ-5D; HIT-6 = headache impact test; MIDAS = Migraine Disability assessment scale

Table 2. Breakdown of number of NHS appointments per type of activity organised per group and respective number of participants responsible for these appointments (12 months post-recruitment).

| Type of NHS appointment                            | Neurology group (n=128) |             |           | MRI group (n=95)  |             |          | p-value |
|----------------------------------------------------|-------------------------|-------------|-----------|-------------------|-------------|----------|---------|
|                                                    | Total of episodes       | Mean (SD)   | N (%)     | Total of episodes | Mean (SD)   | N (%)    |         |
| <i>Primary Care services</i>                       |                         |             |           |                   |             |          |         |
| GP face-to-face appointment                        | 233                     | 1.82 (2.11) | 91 (71)   | 113               | 1.19 (1.64) | 57 (60)  | 0.006   |
| GP phone appointment                               | 37                      | 0.29 (0.75) | 24 (19)   | 25                | 0.26 (0.49) | 23 (24)  | 0.420   |
| <i>Hospital based services</i>                     |                         |             |           |                   |             |          |         |
| Hospital outpatient appointment                    | 322                     | 2.52 (1.19) | 128 (100) | 25                | 0.26 (0.55) | 20 (21)  | <0.001  |
| Inpatient episode                                  | 4                       | 0.03 (0.35) | 1 (0.8)   | 1                 | 0.01 (0.10) | 1 (1.1)  | 0.837   |
| Emergency Department episode                       | 8                       | 0.06 (0.24) | 8 (6.3)   | 5                 | 0.05 (0.22) | 5 (5.3)  | 0.756   |
| Head CT                                            | 1                       | 0.01 (0.09) | 1 (0.8)   | 1                 | 0.01 (0.10) | 1 (1.1)  | 0.832   |
| Brain MRI                                          | 75                      | 0.59 (0.49) | 75 (59)   | 100               | 1.05 (0.30) | 95 (100) | <0.001  |
| Others (e.g. botox and nerve injection treatments) | 39                      | 0.30 (0.79) | 25 (20)   | 5                 | 0.05 (0.30) | 3 (3.2)  | <0.001  |

Table 3. Difference in the number, mean and percentage reduction of NHS appointments per type of activity organised per group 12 months post-recruitment compared to the 12 months pre-recruitment (note: a negative/positive percentage denotes a decrease/increase in activity following recruitment).

| Type of NHS appointment         | Neurology group (n=128) |       |       | MRI group (n=95)  |       |       |
|---------------------------------|-------------------------|-------|-------|-------------------|-------|-------|
|                                 | Total of episodes       | Mean  | %     | Total of episodes | Mean  | %     |
| <i>Primary Care services</i>    |                         |       |       |                   |       |       |
| GP face-to-face appointment     | -197                    | -1.54 | -85%  | -87               | -0.92 | -77%  |
| GP phone appointment            | -11                     | -0.09 | -30%  | 5                 | 0.05  | 20%   |
| <i>Hospital-based services</i>  |                         |       |       |                   |       |       |
| Hospital outpatient appointment | 301                     | 2.36  | 93%   | 23                | 0.24  | 92%   |
| Inpatient episode               | 3                       | 0.02  | 75%   | 1                 | 0.01  | 100%  |
| Emergency Department episode    | -23                     | -0.18 | -288% | -6                | -0.07 | -120% |
| Head CT                         | -9                      | -0.07 | -12%  | 1                 | 0.01  | 1.0%  |
| Brain MRI                       | 55                      | 0.43  | 141%  | 100               | 1.05  | N/A   |



Table 4. Description of incidental findings, its clinical relevance and subsequent pathway.

| <b>Abnormal findings</b>                                          | <b>Significant (Yes/No)?</b> | <b>Changes in diagnostic or treatment pathway</b>         |
|-------------------------------------------------------------------|------------------------------|-----------------------------------------------------------|
| Mature striatocapsular lacune                                     | No                           |                                                           |
| Sinusitis with complete opacification                             | No                           | ENT review only.                                          |
| Pituitary abnormality (T1)                                        | No                           |                                                           |
| Low lying cerebellar tonsils                                      | No                           |                                                           |
| Previous petrous surgery noted                                    | No                           |                                                           |
| Two aneurysms AcomA (anterior communicating artery) and right ICA | Yes                          | Referred to neurovascular – no coiling (no intervention). |
| No definite lesion                                                | No                           | Follow-up MRI only.                                       |

Table 5. Descriptive statistics for one generic questionnaire (EQ-5D-5L) and two headache-specific questionnaires (HIT-6 and MIDAS) at baseline and 6 months post-recruitment.

|                 |                 |               | N         | Mean | Standard Deviation | p-value |       |
|-----------------|-----------------|---------------|-----------|------|--------------------|---------|-------|
| <b>BASELINE</b> | <b>EQ-5D-5L</b> | Utility       | Neurology | 127  | 0.809              | 0.182   | 0.097 |
|                 |                 |               | Radiology | 95   | 0.830              | 0.195   |       |
|                 | Score           | Neurology     | 126       | 64.0 | 18.8               | 0.005   |       |
|                 |                 | Radiology     | 95        | 70.8 | 20.2               |         |       |
|                 | <b>HIT-6</b>    | Score         | Neurology | 128  | 65.0               | 5.3     | 0.006 |
|                 |                 |               | Radiology | 92   | 62.6               | 7.3     |       |
|                 | Score           | Neurology     | 124       | 57.8 | 54.0               | 0.075   |       |
|                 |                 | Radiology     | 90        | 44.8 | 44.9               |         |       |
|                 | <b>MIDAS</b>    | Headache days | Neurology | 124  | 51.6               | 31.5    | 0.038 |
|                 |                 |               | Radiology | 90   | 42.8               | 30.7    |       |
|                 |                 | Pain score    | Neurology | 124  | 6.9                | 1.8     | 0.778 |
|                 |                 |               | Radiology | 90   | 6.9                | 1.9     |       |
| <b>MONTH 6</b>  | <b>EQ-5D-5L</b> | Utility       | Neurology | 55   | 0.770              | 0.263   | 0.243 |
|                 |                 |               | Radiology | 26   | 0.681              | 0.346   |       |
|                 | Score           | Neurology     | 53        | 68.2 | 20.6               | 0.463   |       |
|                 |                 | Radiology     | 23        | 62.5 | 24.7               |         |       |
|                 | <b>HIT-6</b>    | Score         | Neurology | 35   | 60.0               | 8.7     | 0.968 |
|                 |                 |               | Radiology | 12   | 53.1               | 22.8    |       |
|                 | Score           | Neurology     | 32        | 52.6 | 58.1               | 0.827   |       |
|                 |                 | Radiology     | 12        | 40.7 | 36.0               |         |       |
|                 | <b>MIDAS</b>    | Headache days | Neurology | 46   | 41.2               | 28.6    | 0.152 |
|                 |                 |               | Radiology | 15   | 26.5               | 28.1    |       |
|                 |                 | Pain score    | Neurology | 44   | 4.5                | 2.3     | 0.663 |
|                 |                 |               | Radiology | 15   | 4.2                | 2.0     |       |

1  
2  
3  
4  
5  
6  
7  
8  
9  
10  
11  
12  
13  
14  
15  
16  
17  
18  
19  
20  
21  
22  
23  
24  
25  
26  
27  
28  
29  
30  
31  
32  
33  
34  
35  
36  
37  
38  
39  
40  
41  
42  
43  
44  
45  
46  
47  
48  
49  
50  
51  
52  
53  
54  
55  
56  
57  
58  
59  
60

For peer review only

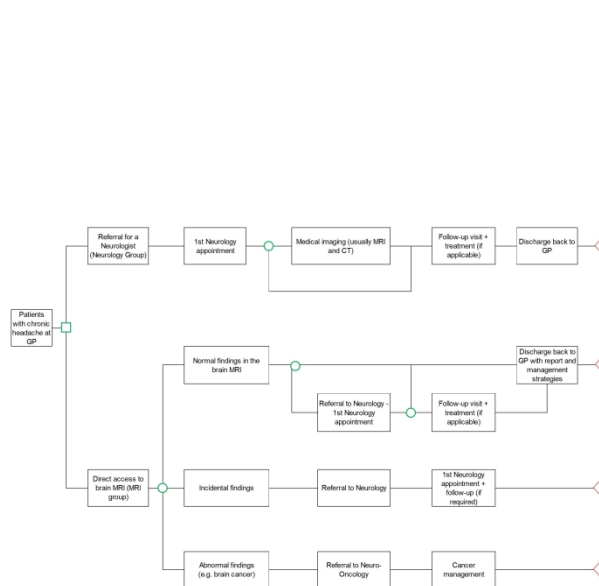

Figure 1. High-level illustration of two existing clinical pathways associated with the referral from GP due to chronic headache.

338x190mm (300 x 300 DPI)

1  
2  
3  
4  
5  
6  
7  
8  
9  
10  
11  
12  
13  
14  
15  
16  
17  
18  
19  
20  
21  
22  
23  
24  
25  
26  
27  
28  
29  
30  
31  
32  
33  
34  
35  
36  
37  
38  
39  
40  
41  
42  
43  
44  
45  
46  
47  
48  
49  
50  
51  
52  
53  
54  
55  
56  
57  
58  
59  
60

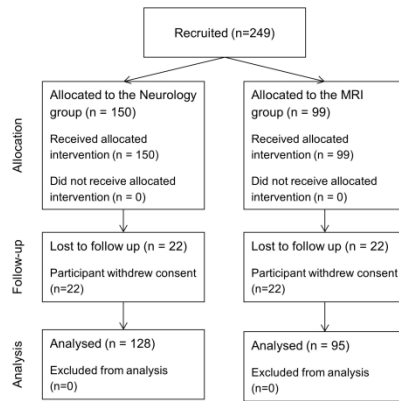

Figure 2. Participant flow chart for the headache study.

338x190mm (300 x 300 DPI)

## Appendix I. Patient satisfaction.

This questionnaire evaluated three dimensions of analysis: (a) referral process (time elapsed between referral from primary care to initial secondary care appointment); (b) initial appointment; and (c) overall experience three months after recruitment.

**(a):** Patient experience questionnaire associated with the referral process to either Neurology (n=99) or Radiology (n=79).

|                                                                        |                  | Not sure |      | Yes |     | No |     | p-value |
|------------------------------------------------------------------------|------------------|----------|------|-----|-----|----|-----|---------|
|                                                                        |                  | N        | %    | N   | %   | N  | %   |         |
| Did you receive your appointment within a timeframe acceptable to you? | Neurology (n=99) | 8        | 8.1% | 66  | 67% | 25 | 25% | 0.193   |
|                                                                        | Radiology (n=79) | 3        | 3.8% | 62  | 79% | 14 | 18% |         |

|                                                                  |                  | Very satisfied |     | Satisfied |     | Neutral |     | Dissatisfied |      | Very dissatisfied |      | p-value |
|------------------------------------------------------------------|------------------|----------------|-----|-----------|-----|---------|-----|--------------|------|-------------------|------|---------|
|                                                                  |                  | N              | %   | N         | %   | N       | %   | N            | %    | N                 | %    |         |
| How satisfied were with the information you received beforehand? | Neurology (n=98) | 25             | 26% | 48        | 49% | 22      | 22% | 3            | 3.1% | 0                 | 0%   | 0.005   |
|                                                                  | Radiology (n=79) | 38             | 50% | 24        | 32% | 10      | 13% | 2            | 2.6% | 2                 | 2.6% |         |

**(b):** Patient experience questionnaire associated with either the Neurology (n=99) or the Radiology (n=50) appointment.

|                                    |                  | Very satisfied |     | Satisfied |     | Neutral |      | Dissatisfied |      | Very dissatisfied |    | p-value |
|------------------------------------|------------------|----------------|-----|-----------|-----|---------|------|--------------|------|-------------------|----|---------|
|                                    |                  | N              | %   | N         | %   | N       | %    | N            | %    | N                 | %  |         |
| How you found the process overall? | Neurology (n=98) | 55             | 56% | 36        | 36% | 5       | 5.1% | 3            | 3.0% | 0                 | 0% | 0.366   |
|                                    | Radiology (n=50) | 27             | 54% | 22        | 44% | 0       | 0.0% | 1            | 2.0% | 0                 | 0% |         |

|                                                                         |                  | A better experience |     | About the same as expected |     | A worse experience |      | p-value |
|-------------------------------------------------------------------------|------------------|---------------------|-----|----------------------------|-----|--------------------|------|---------|
|                                                                         |                  | N                   | %   | N                          | %   | N                  | %    |         |
| How did you find the experience in comparison to what you had expected? | Neurology (n=95) | 57                  | 60% | 35                         | 37% | 3                  | 3.2% | 0.002   |
|                                                                         | Radiology (n=45) | 13                  | 29% | 31                         | 69% | 1                  | 2.2% |         |

(c): Overall patient experience questionnaire at 3 months post-recruitment with either the Neurology (n=56) or the Radiology (n=14) appointment.

|                                            |                  | Very satisfied |      | Satisfied |      | Neutral |     | Dissatisfied |       | Very dissatisfied |      | p-value |
|--------------------------------------------|------------------|----------------|------|-----------|------|---------|-----|--------------|-------|-------------------|------|---------|
|                                            |                  | N              | %    | N         | %    | N       | %   | N            | %     | N                 | %    |         |
| Amount of time spent with clinical staff   | Neurology (n=56) | 20             | 36%  | 30        | 54%  | 6       | 11% | 0            | 0%    | 0                 | 0%   | 0.001   |
|                                            | Radiology (n=14) | 3              | 21%  | 3         | 21%  | 5       | 36% | 1            | 7.1%  | 2                 | 14%  |         |
| Consistency of care                        | Neurology (n=29) | 16             | 55%  | 0         | 0%   | 12      | 41% | 1            | 3.4%  | 0                 | 0%   | 0.028   |
|                                            | Radiology (n=14) | 2              | 14%  | 3         | 21%  | 6       | 43% | 2            | 14.3% | 1                 | 7.1% |         |
| Frequency of appointments                  | Neurology (n=55) | 9              | 16%  | 19        | 35%  | 22      | 40% | 4            | 7.3%  | 1                 | 1.8% | 0.166   |
|                                            | Radiology (n=14) | 2              | 14%  | 1         | 7.1% | 7       | 50% | 3            | 21%   | 1                 | 7.1% |         |
| How informed you felt about your condition | Neurology (n=54) | 15             | 28%  | 24        | 44%  | 9       | 17% | 5            | 9.3%  | 1                 | 1.9% | 0.010   |
|                                            | Radiology (n=13) | 2              | 15%  | 2         | 15%  | 5       | 39% | 1            | 7.7%  | 3                 | 23%  |         |
| How informed you felt about your treatment | Neurology (n=55) | 15             | 27%  | 18        | 33%  | 17      | 31% | 4            | 7.3%  | 1                 | 1.8% | 0.004   |
|                                            | Radiology (n=14) | 1              | 7.1% | 1         | 7.1% | 5       | 36% | 5            | 36%   | 2                 | 14%  |         |
| Your overall experience                    | Neurology (n=55) | 13             | 24%  | 32        | 58%  | 7       | 13% | 3            | 5.5%  | 0                 | 0%   | <0.001  |
|                                            | Radiology (n=14) | 2              | 14%  | 1         | 7.1% | 9       | 64% | 1            | 7.1%  | 1                 | 7.1% |         |



# Reporting checklist for quality improvement study.

Based on the SQUIRE guidelines.

## Instructions to authors

Complete this checklist by entering the page numbers from your manuscript where readers will find each of the items listed below.

Your article may not currently address all the items on the checklist. Please modify your text to include the missing information. If you are certain that an item does not apply, please write "n/a" and provide a short explanation.

Upload your completed checklist as an extra file when you submit to a journal.

In your methods section, say that you used the SQUIRE reporting guidelines, and cite them as:

Ogrinc G, Davies L, Goodman D, Batalden P, Davidoff F, Stevens D. SQUIRE 2.0 (Standards for Quality Improvement Reporting Excellence): revised publication guidelines from a detailed consensus process

|                    | Reporting Item                                                                                                                                                                                                         | Page Number |
|--------------------|------------------------------------------------------------------------------------------------------------------------------------------------------------------------------------------------------------------------|-------------|
| <b>Title</b>       |                                                                                                                                                                                                                        |             |
| <a href="#">#1</a> | Indicate that the manuscript concerns an initiative to improve healthcare (broadly defined to include the quality, safety, effectiveness, patientcenteredness, timeliness, cost, efficiency, and equity of healthcare) | 1           |

## Abstract

[#02a](#) Provide adequate information to aid in searching and indexing 4

[#02b](#) Summarize all key information from various sections of the text using the abstract format of the intended publication or a structured summary such as: background, local problem, methods, interventions, results, conclusions 4

## Introduction

[#3](#) Problem description Nature and significance of the local problem 6

[#4](#) Available knowledge Summary of what is currently known about the problem, including relevant previous studies 6

[#5](#) Rationale Informal or formal frameworks, models, concepts, and / or theories used to explain the problem, any reasons or assumptions that were used to develop the intervention(s), and reasons why the intervention(s) was expected to work 6-7

[#6](#) Specific aims Purpose of the project and of this report 7

## Methods

[#7](#) Context Contextual elements considered important at the outset of introducing the intervention(s) 7

[#08a](#) Intervention(s) Description of the intervention(s) in sufficient detail that others could reproduce it 7

|    |                 |                      |                                                                   |     |
|----|-----------------|----------------------|-------------------------------------------------------------------|-----|
| 1  | Intervention(s) | <a href="#">#08b</a> | Specifics of the team involved in the work                        | 7   |
| 2  |                 |                      |                                                                   |     |
| 3  |                 |                      |                                                                   |     |
| 4  | Study of the    | <a href="#">#09a</a> | Approach chosen for assessing the impact of the                   | 7-8 |
| 5  |                 |                      |                                                                   |     |
| 6  | Intervention(s) |                      | intervention(s)                                                   |     |
| 7  |                 |                      |                                                                   |     |
| 8  |                 |                      |                                                                   |     |
| 9  |                 |                      |                                                                   |     |
| 10 | Study of the    | <a href="#">#09b</a> | Approach used to establish whether the observed outcomes          | 8-9 |
| 11 |                 |                      |                                                                   |     |
| 12 | Intervention(s) |                      | were due to the intervention(s)                                   |     |
| 13 |                 |                      |                                                                   |     |
| 14 |                 |                      |                                                                   |     |
| 15 | Measures        | <a href="#">#10a</a> | Measures chosen for studying processes and outcomes of            | 7-8 |
| 16 |                 |                      |                                                                   |     |
| 17 |                 |                      | the intervention(s), including rationale for choosing them,       |     |
| 18 |                 |                      |                                                                   |     |
| 19 |                 |                      | their operational definitions, and their validity and reliability |     |
| 20 |                 |                      |                                                                   |     |
| 21 |                 |                      |                                                                   |     |
| 22 |                 |                      |                                                                   |     |
| 23 | Measures        | <a href="#">#10b</a> | Description of the approach to the ongoing assessment of          | 7-8 |
| 24 |                 |                      |                                                                   |     |
| 25 |                 |                      | contextual elements that contributed to the success, failure,     |     |
| 26 |                 |                      |                                                                   |     |
| 27 |                 |                      | efficiency, and cost                                              |     |
| 28 |                 |                      |                                                                   |     |
| 29 |                 |                      |                                                                   |     |
| 30 | Measures        | <a href="#">#10c</a> | Methods employed for assessing completeness and                   | 7-8 |
| 31 |                 |                      |                                                                   |     |
| 32 |                 |                      | accuracy of data                                                  |     |
| 33 |                 |                      |                                                                   |     |
| 34 |                 |                      |                                                                   |     |
| 35 |                 |                      |                                                                   |     |
| 36 | Analysis        | <a href="#">#11a</a> | Qualitative and quantitative methods used to draw                 | 8-9 |
| 37 |                 |                      |                                                                   |     |
| 38 |                 |                      | inferences from the data                                          |     |
| 39 |                 |                      |                                                                   |     |
| 40 |                 |                      |                                                                   |     |
| 41 | Analysis        | <a href="#">#11b</a> | Methods for understanding variation within the data,              | 8-9 |
| 42 |                 |                      |                                                                   |     |
| 43 |                 |                      | including the effects of time as a variable                       |     |
| 44 |                 |                      |                                                                   |     |
| 45 |                 |                      |                                                                   |     |
| 46 | Ethical         | <a href="#">#12</a>  | Ethical aspects of implementing and studying the                  | 7   |
| 47 |                 |                      |                                                                   |     |
| 48 | considerations  |                      | intervention(s) and how they were addressed, including, but       |     |
| 49 |                 |                      |                                                                   |     |
| 50 |                 |                      | not limited to, formal ethics review and potential conflict(s) of |     |
| 51 |                 |                      |                                                                   |     |
| 52 |                 |                      | interest                                                          |     |
| 53 |                 |                      |                                                                   |     |
| 54 |                 |                      |                                                                   |     |
| 55 |                 |                      |                                                                   |     |
| 56 | <b>Results</b>  |                      |                                                                   |     |
| 57 |                 |                      |                                                                   |     |
| 58 |                 |                      |                                                                   |     |
| 59 |                 |                      |                                                                   |     |
| 60 |                 |                      |                                                                   |     |

|    |                      |                                                                                      |           |
|----|----------------------|--------------------------------------------------------------------------------------|-----------|
| 1  | <a href="#">#13a</a> | Initial steps of the intervention(s) and their evolution over                        | 9, 17,18  |
| 2  |                      | time (e.g., time-line diagram, flow chart, or table), including                      |           |
| 3  |                      | modifications made to the intervention during the project                            |           |
| 4  |                      |                                                                                      |           |
| 5  |                      |                                                                                      |           |
| 6  |                      |                                                                                      |           |
| 7  |                      |                                                                                      |           |
| 8  |                      |                                                                                      |           |
| 9  | <a href="#">#13b</a> | Details of the process measures and outcome                                          | 10, 11,19 |
| 10 |                      |                                                                                      |           |
| 11 |                      |                                                                                      |           |
| 12 | <a href="#">#13c</a> | Contextual elements that interacted with the intervention(s)                         |           |
| 13 |                      |                                                                                      |           |
| 14 |                      |                                                                                      |           |
| 15 | <a href="#">#13d</a> | Observed associations between outcomes, interventions,                               | 10,11,20- |
| 16 |                      | and relevant contextual elements                                                     | ,23       |
| 17 |                      |                                                                                      |           |
| 18 |                      |                                                                                      |           |
| 19 |                      |                                                                                      |           |
| 20 | <a href="#">#13e</a> | Unintended consequences such as unexpected benefits,                                 |           |
| 21 |                      | problems, failures, or costs associated with the                                     |           |
| 22 |                      | intervention(s).                                                                     |           |
| 23 |                      |                                                                                      |           |
| 24 |                      |                                                                                      |           |
| 25 |                      |                                                                                      |           |
| 26 |                      |                                                                                      |           |
| 27 |                      |                                                                                      |           |
| 28 | <a href="#">#13f</a> | Details about missing data                                                           | 9         |
| 29 |                      |                                                                                      |           |
| 30 |                      |                                                                                      |           |
| 31 | <b>Discussion</b>    |                                                                                      |           |
| 32 |                      |                                                                                      |           |
| 33 |                      |                                                                                      |           |
| 34 | Summary              | <a href="#">#14a</a> Key findings, including relevance to the rationale and specific | 12-14     |
| 35 |                      | aims                                                                                 |           |
| 36 |                      |                                                                                      |           |
| 37 |                      |                                                                                      |           |
| 38 |                      |                                                                                      |           |
| 39 | Summary              | <a href="#">#14b</a> Particular strengths of the project                             | 14        |
| 40 |                      |                                                                                      |           |
| 41 |                      |                                                                                      |           |
| 42 | Interpretation       | <a href="#">#15a</a> Nature of the association between the intervention(s) and the   | 12,13     |
| 43 |                      | outcomes                                                                             |           |
| 44 |                      |                                                                                      |           |
| 45 |                      |                                                                                      |           |
| 46 |                      |                                                                                      |           |
| 47 |                      |                                                                                      |           |
| 48 | Interpretation       | <a href="#">#15b</a> Comparison of results with findings from other publications     | 12        |
| 49 |                      |                                                                                      |           |
| 50 |                      |                                                                                      |           |
| 51 | Interpretation       | <a href="#">#15c</a> Impact of the project on people and systems                     | 13,14     |
| 52 |                      |                                                                                      |           |
| 53 |                      |                                                                                      |           |
| 54 | Interpretation       | <a href="#">#15d</a> Reasons for any differences between observed and                | 12        |
| 55 |                      | anticipated outcomes, including the influence of context                             |           |
| 56 |                      |                                                                                      |           |
| 57 |                      |                                                                                      |           |
| 58 |                      |                                                                                      |           |
| 59 |                      |                                                                                      |           |
| 60 |                      |                                                                                      |           |

|    |                    |                      |                                                               |       |
|----|--------------------|----------------------|---------------------------------------------------------------|-------|
| 1  | Interpretation     | <a href="#">#15e</a> | Costs and strategic trade-offs, including opportunity costs   |       |
| 2  |                    |                      |                                                               |       |
| 3  |                    |                      |                                                               |       |
| 4  | Limitations        | <a href="#">#16a</a> | Limits to the generalizability of the work                    | 14,15 |
| 5  |                    |                      |                                                               |       |
| 6  |                    |                      |                                                               |       |
| 7  | Limitations        | <a href="#">#16b</a> | Factors that might have limited internal validity such as     | 14,15 |
| 8  |                    |                      | confounding, bias, or imprecision in the design, methods,     |       |
| 9  |                    |                      | measurement, or analysis                                      |       |
| 10 |                    |                      |                                                               |       |
| 11 |                    |                      |                                                               |       |
| 12 |                    |                      |                                                               |       |
| 13 |                    |                      |                                                               |       |
| 14 |                    |                      |                                                               |       |
| 15 | Limitations        | <a href="#">#16c</a> | Efforts made to minimize and adjust for limitations           | 14,15 |
| 16 |                    |                      |                                                               |       |
| 17 |                    |                      |                                                               |       |
| 18 | Conclusion         | <a href="#">#17a</a> | Usefulness of the work                                        | 15    |
| 19 |                    |                      |                                                               |       |
| 20 |                    |                      |                                                               |       |
| 21 | Conclusion         | <a href="#">#17b</a> | Sustainability                                                | 15    |
| 22 |                    |                      |                                                               |       |
| 23 |                    |                      |                                                               |       |
| 24 | Conclusion         | <a href="#">#17c</a> | Potential for spread to other contexts                        | 15    |
| 25 |                    |                      |                                                               |       |
| 26 |                    |                      |                                                               |       |
| 27 | Conclusion         | <a href="#">#17d</a> | Implications for practice and for further study in the field  | 15    |
| 28 |                    |                      |                                                               |       |
| 29 |                    |                      |                                                               |       |
| 30 | Conclusion         | <a href="#">#17e</a> | Suggested next steps                                          | 15    |
| 31 |                    |                      |                                                               |       |
| 32 |                    |                      |                                                               |       |
| 33 | <b>Other</b>       |                      |                                                               |       |
| 34 |                    |                      |                                                               |       |
| 35 | <b>information</b> |                      |                                                               |       |
| 36 |                    |                      |                                                               |       |
| 37 |                    |                      |                                                               |       |
| 38 |                    |                      |                                                               |       |
| 39 | Funding            | <a href="#">#18</a>  | Sources of funding that supported this work. Role, if any, of | 5     |
| 40 |                    |                      | the funding organization in the design, implementation,       |       |
| 41 |                    |                      | interpretation, and reporting                                 |       |
| 42 |                    |                      |                                                               |       |
| 43 |                    |                      |                                                               |       |
| 44 |                    |                      |                                                               |       |
| 45 |                    |                      |                                                               |       |

None The SQUIRE 2.0 checklist is distributed under the terms of the Creative Commons Attribution License CC BY-NC 4.0. This checklist can be completed online using <https://www.goodreports.org/>, a tool made by the [EQUATOR Network](#) in collaboration with [Penelope.ai](#)

# BMJ Open

## The management of chronic headache with referral from primary care to direct access to Magnetic Resonance Imaging (MRI) compared to Neurology services: an observational prospective study in London.

|                                 |                                                                                                                                                                                                                                                                                                                                                                                                                                                                                                                                                                                                                                                                                                                                                                                                                                                                                                                                                                                                                                                                                                                       |
|---------------------------------|-----------------------------------------------------------------------------------------------------------------------------------------------------------------------------------------------------------------------------------------------------------------------------------------------------------------------------------------------------------------------------------------------------------------------------------------------------------------------------------------------------------------------------------------------------------------------------------------------------------------------------------------------------------------------------------------------------------------------------------------------------------------------------------------------------------------------------------------------------------------------------------------------------------------------------------------------------------------------------------------------------------------------------------------------------------------------------------------------------------------------|
| Journal:                        | <i>BMJ Open</i>                                                                                                                                                                                                                                                                                                                                                                                                                                                                                                                                                                                                                                                                                                                                                                                                                                                                                                                                                                                                                                                                                                       |
| Manuscript ID                   | bmjopen-2019-036097.R1                                                                                                                                                                                                                                                                                                                                                                                                                                                                                                                                                                                                                                                                                                                                                                                                                                                                                                                                                                                                                                                                                                |
| Article Type:                   | Original research                                                                                                                                                                                                                                                                                                                                                                                                                                                                                                                                                                                                                                                                                                                                                                                                                                                                                                                                                                                                                                                                                                     |
| Date Submitted by the Author:   | 13-Mar-2020                                                                                                                                                                                                                                                                                                                                                                                                                                                                                                                                                                                                                                                                                                                                                                                                                                                                                                                                                                                                                                                                                                           |
| Complete List of Authors:       | Rua, Tiago; King's College London, King's Health Economics; Guy's and Saint Thomas' NHS Foundation Trust, Clinical Imaging and Medical Physics<br>Mazumder, Asif; Guy's & St Thomas' Hospitals NHS Foundation Trust, Neuroradiology Group, Department of Radiology, Lambeth Wing<br>Akande, Yvonne; Guy's and Saint Thomas' NHS Foundation Trust, Clinical Imaging and Medical Physics<br>Margariti, Charikleia; King's College London<br>Ochulor, Juliana; Guy's and Saint Thomas' NHS Foundation Trust, Neurology Department<br>Turville, Joanna; Guy's and Saint Thomas' NHS Foundation Trust, Clinical Imaging and Medical Physics<br>Razavi, Reza; King's College London, Imaging Science Division<br>Peacock, Janet; King's College London, Division of Primary Care and Public Health Sciences<br>McCrone, Paul; King's College London,<br>Goh, Vicky; King's College London, School of Biomedical Engineering and Imaging Sciences<br>Shearer, James; King's College London, i. Primary Care and Public Health Sciences<br>Afridi, Shazia; Guy's and Saint Thomas' NHS Foundation Trust, Neurology Department |
| <b>Primary Subject Heading</b>: | Neurology                                                                                                                                                                                                                                                                                                                                                                                                                                                                                                                                                                                                                                                                                                                                                                                                                                                                                                                                                                                                                                                                                                             |
| Secondary Subject Heading:      | Diagnostics, Evidence based practice, General practice / Family practice, Health economics, Radiology and imaging                                                                                                                                                                                                                                                                                                                                                                                                                                                                                                                                                                                                                                                                                                                                                                                                                                                                                                                                                                                                     |
| Keywords:                       | Migraine < NEUROLOGY, RADIOLOGY & IMAGING, Head & neck imaging < RADIOLOGY & IMAGING, Magnetic resonance imaging < RADIOLOGY & IMAGING, HEALTH ECONOMICS                                                                                                                                                                                                                                                                                                                                                                                                                                                                                                                                                                                                                                                                                                                                                                                                                                                                                                                                                              |
|                                 |                                                                                                                                                                                                                                                                                                                                                                                                                                                                                                                                                                                                                                                                                                                                                                                                                                                                                                                                                                                                                                                                                                                       |

1  
2  
3  
4  
5  
6  
7  
8  
9  
10  
11  
12  
13  
14  
15  
16  
17  
18  
19  
20  
21  
22  
23  
24  
25  
26  
27  
28  
29  
30  
31  
32  
33  
34  
35  
36  
37  
38  
39  
40  
41  
42  
43  
44  
45  
46  
47  
48  
49  
50  
51  
52  
53  
54  
55  
56  
57  
58  
59  
60

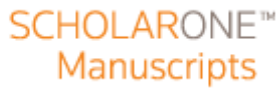

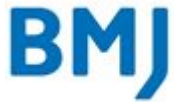

I, the Submitting Author has the right to grant and does grant on behalf of all authors of the Work (as defined in the below author licence), an exclusive licence and/or a non-exclusive licence for contributions from authors who are: i) UK Crown employees; ii) where BMJ has agreed a CC-BY licence shall apply, and/or iii) in accordance with the terms applicable for US Federal Government officers or employees acting as part of their official duties; on a worldwide, perpetual, irrevocable, royalty-free basis to BMJ Publishing Group Ltd ("BMJ") its licensees and where the relevant Journal is co-owned by BMJ to the co-owners of the Journal, to publish the Work in this journal and any other BMJ products and to exploit all rights, as set out in our [licence](#).

The Submitting Author accepts and understands that any supply made under these terms is made by BMJ to the Submitting Author unless you are acting as an employee on behalf of your employer or a postgraduate student of an affiliated institution which is paying any applicable article publishing charge ("APC") for Open Access articles. Where the Submitting Author wishes to make the Work available on an Open Access basis (and intends to pay the relevant APC), the terms of reuse of such Open Access shall be governed by a Creative Commons licence – details of these licences and which [Creative Commons](#) licence will apply to this Work are set out in our licence referred to above.

Other than as permitted in any relevant BMJ Author's Self Archiving Policies, I confirm this Work has not been accepted for publication elsewhere, is not being considered for publication elsewhere and does not duplicate material already published. I confirm all authors consent to publication of this Work and authorise the granting of this licence.



1  
2  
3 **The management of chronic headache with referral from primary care to direct**  
4 **access to Magnetic Resonance Imaging (MRI) compared to Neurology services: an**  
5 **observational prospective study in London.**  
6  
7  
8  
9

10 Tiago Rua<sup>1,2</sup>, Asif A. Mazumder<sup>2</sup>, Yvonne Akande<sup>2</sup>, Charikleia Margariti<sup>2</sup>, Juliana Ochulor<sup>3</sup>, Joanna  
11 Turville<sup>2</sup>, Reza Razavi<sup>2,4</sup>, Janet L. Peacock<sup>5</sup>, Paul McCrone<sup>1</sup>, Vicky Goh<sup>2,6</sup>, James Shearer<sup>1</sup>, Shazia.K.  
12 Afridi<sup>3</sup>  
13  
14

15  
16  
17 <sup>1</sup> King's Health Economics, King's College London, London, UK  
18

19  
20 <sup>2</sup> Department of Clinical Imaging and Medical Physics, Guy's and St Thomas' NHS Foundation Trust,  
21 London, UK  
22

23  
24 <sup>3</sup> Department of Neurology, Guy's and St Thomas' NHS Foundation Trust, London, UK  
25

26  
27 <sup>4</sup> Vice President & Vice-Principal (Research), King's College London, London, UK  
28

29  
30 <sup>5</sup> School of Population Health and Environmental Sciences, King's College London, London, UK  
31

32  
33 <sup>6</sup> Cancer Imaging, School of Biomedical Engineering and Imaging Sciences, King's College London,  
34 London, UK  
35  
36  
37  
38

39 Tiago Rua, Health Technology Analyst, King's Health Economics, King's College London, London, UK;  
40 Clinical Imaging and Medical Physics Directorate, Guy's and St Thomas' NHS Foundation Trust, London,  
41 UK. E-mail: tiago.rua@kcl.ac.uk  
42

43  
44 Asif A. Mazumder, Consultant Neuroradiologist, Guy's and St Thomas NHS Trust, London, UK; Honorary  
45 Senior Clinical Lecturer, King's College London, London, UK. E-mail: asif.mazumder@gstt.nhs.uk  
46

47 Yvonne Akande, Project Manager, Guy's and St Thomas NHS Trust, London, UK. Email:  
48 yvonne.akande@kcl.ac.uk  
49

50 Charikleia Margariti, Research Assistant, School of Biomedical Engineering and Imaging Sciences, King's  
51 College London, London, UK. E-mail: charikleia.margariti@kcl.ac.uk  
52

53  
54 Juliana Ochulor, Clinical Nurse Specialist, Guy's and St Thomas NHS Trust, London, UK. E-mail:  
55 juliana.ochulor@gstt.nhs.uk  
56  
57

1  
2  
3 Joanna Turville, Project Director, Department of Clinical Imaging and Medical Physics, Guy's and St  
4 Thomas' NHS Foundation Trust, London, UK. E-mail: joanna.turville@gstt.nhs.uk  
5

6  
7 Reza Razavi, Vice President & Vice-Principal (Research), King's College London, London, UK. E-mail:  
8 reza.razavi@kcl.ac.uk  
9

10 Janet L. Peacock, Professor of Medical Statistics, School of Population Health and Environmental  
11 Sciences, King's College London, London, UK. E-mail: janet.peacock@kcl.ac.uk  
12

13  
14 Paul McCrone, Professor in Health Economics, King's Health Economics, King's College London, London,  
15 UK. E-mail: p.mccrone@greenwich.ac.uk  
16

17  
18 Vicky Goh, Professor of Clinical Cancer Imaging; Honorary Consultant Radiologist, Clinical Imaging and  
19 Medical Physics Directorate, Guy's and St Thomas' NHS Foundation Trust, London, UK; Cancer Imaging,  
20 School of Biomedical Engineering and Imaging Sciences, King's College London, London, UK. E-mail:  
21 vicky.goh@kcl.ac.uk  
22

23  
24 James Shearer, Lecturer in Health Economics, King's Health Economics, King's College London, London,  
25 UK. E-mail: james.shearer@kcl.ac.uk  
26

27  
28 Shazia K Afridi, Consultant Neurologist, Guy's and St Thomas' NHS Trust; Visiting Senior Lecturer, King's  
29 College London, London, UK. E-mail: shazia.afridi@gstt.nhs.uk  
30

31  
32  
33  
34  
35 **Corresponding author:** Tiago Rua, 5<sup>th</sup> floor Becket House, 1 Lambeth Palace Road, London SE1 7EU. E-  
36 mail: [tiago.rua@kcl.ac.uk](mailto:tiago.rua@kcl.ac.uk). Contact number: 020 7188 9529  
37

38  
39  
40  
41 **Acknowledgements:** The authors would like to thank all patients and staff members at Guy's and St  
42 Thomas' NHS Trust, particularly neurology and radiology consultants, for making this study possible.  
43  
44  
45  
46  
47  
48  
49  
50  
51  
52  
53  
54  
55  
56  
57  
58  
59  
60

## Abstract

**Objectives.** To evaluate the cost, accessibility and patient satisfaction implications of two clinical pathways used in the management of chronic headache.

**Intervention.** Management of chronic headache following referral from Primary Care that differed in the first appointment, either a Neurology appointment or an MRI brain scan.

**Design and setting.** A pragmatic, non-randomised, prospective, single-center study at a Central Hospital in London.

**Participants.** Adult patients with chronic headache referred from Primary to Secondary Care.

**Primary and secondary outcome measures.** Participants' use of health care services and costs were estimated using primary and secondary care databases and questionnaires quarterly up to 12 months post-recruitment. Cost analyses were compared using generalised linear models (GLM). Secondary outcomes assessed: access to care, patient satisfaction, headache burden and self-perceived quality of life using headache-specific (MIDAS, HIT-6) and a generic questionnaire (EQ-5D-5L).

**Results.** Mean (SD) cost up to 6 months post-recruitment per participant was £578 (£420) for the Neurology group (n=128) and £245 (£172) for the MRI group (n=95), leading to an estimated mean cost difference of £333 (95% CI £253 to £413,  $p<0.001$ ). The mean cost difference at 12 months increased to £518 (95% CI £401 to £637,  $p<0.001$ ). When adjusted for baseline and follow-up imbalances between groups, this remained statistically significant. The utilisation of brain MRI improved access to care compared to the Neurology group ( $p<0.001$ ). Participants in the Neurology group reported higher levels of satisfaction associated with the pathway and led to greater change in care management.

**Conclusion.** Direct referral to brain MRI from Primary Care led to cost-savings and quicker access to care but lower satisfaction levels when compared with referral to Neurology services. Further research into the use of brain MRI for a subset of patient population more likely to be reassured by a negative brain scan should be considered.

**Keywords:** Chronic headache; migraine; direct access; magnetic resonance imaging; cost analysis.

### Strengths and limitations of this study

- The estimate of health care resource use was based on comprehensive and complete data retrieved from hospital databases supplemented by both primary care utilisation data and self-reported participant data.

- 1
- 2
- 3
- 4
- 5
- 6
- 7
- 8
- 9
- 10
- 11
- 12
- 13
- 14
- 15
- 16
- 17
- 18
- 19
- 20
- 21
- 22
- 23
- 24
- 25
- 26
- 27
- 28
- 29
- 30
- 31
- 32
- 33
- 34
- 35
- 36
- 37
- 38
- 39
- 40
- 41
- 42
- 43
- 44
- 45
- 46
- 47
- 48
- 49
- 50
- 51
- 52
- 53
- 54
- 55
- 56
- 57
- 58
- 59
- 60
- The evaluation of the intervention's impact considered different dimensions of analysis (efficiency, quality of care, access to care and patient satisfaction).
- This was a single-centre study with participants recruited from one central hospital in London, therefore a multi-centre study would be necessary to explore the generalisability of the results.

For peer review only

## Introduction

Globally, the percentage of the adult population with an active headache disorder is 47% for episodic headache and 3% for chronic headache (lasting more than 15 days per month) [1]. Headache is in the top ten international causes of disability [2], with nearly half of sufferers reporting it affects work, home or social activities [3–5]. Most headaches are primary headache disorders, such as migraine or tension-type headaches. Secondary headaches, due to an underlying serious pathology (e.g. tumour, brain aneurysm) are far less common [6]. In fact, less than 0.1% of the lifetime headache prevalence is associated with a life-threatening condition, which can include primary or secondary brain tumours [2,3].

Most headache sufferers self-manage, but over 4% of adults each year consult their General Practitioner (GP) [7, 8]. GPs manage 97% of headache presentations, particularly GPs with special interest and training in headache training initiatives [9], with 2% of these referred to neurologists and 1% to other specialists [7]. Headache is the most common cause for GP referrals to neurologists accounting for up to 20–30% [10–13], the vast majority of these are for migraine. Chronic migraine sufferers (>15 days/month) had more emergency department/hospital visits, and diagnostic tests than those with episodic migraine and consequently the medical costs were three times higher [14]. Hence, despite the benign nature of most headaches, headache management is associated with high health care utilisation. Furthermore, a study in multiple countries of the European Union found that headache management was variable in terms of visits with GPs and specialists and medication use [15]. Between 2012 and 2014, patients presenting to headache specialists (either neurologists or GPs with special interest in headache) costed £956 million in the UK [13, 16].

GP direct access to imaging has been defined as a priority within the National Health Service (NHS), with direct access to brain Magnetic Resonance Imaging (MRI) for the diagnosis of brain cancer identified as a specific initiative [8]. GPs have reported referrals for secondary care, both for a neurologist consultation or neuroimaging, when they were unable to reassure the patient [17, 18]. Furthermore, Morgan et al. (2007) found that referral for headache is often the outcome of patient pressure and anxiety interacting with GP characteristics, organisational factors and service availability rather than the headache severity itself [17]. This contrasts with the recommendations from the National Institute for Health and Care Excellence (NICE) that does not recommend the use of neuroimaging for reassurance purposes [19]. A US study estimated that patients with new onset migraine headache or a flare-up of chronic headache had, respectively, a 39% (95% CI 24–54%) and 51% (95% CI 32–68%) probability of having neuroimaging routinely ordered even where guidelines specifically recommended against this approach [20]. A UK-based randomised controlled trial evaluated the cost implications of using brain MRI for reassurance purposes and found that it led to a decrease in health care costs, in particular for patients with higher levels of psychiatric morbidity [21].

In summary, despite proportionately low level of referrals to secondary care, high prevalence makes headache the most frequently listed reason for referral to neurologists and thus, utilises capacity that is

1  
2  
3 severely constrained. The potential decrease of referral rates to Neurology specialists as a result of direct  
4 access to imaging holds the potential release resources. On the other hand, direct access may be  
5 associated with a transfer of workload to Radiology, as not all patients directly referred to brain MRI would  
6 routinely undergo an MRI scan as part of the management of their chronic headache. This study aims to  
7 evaluate the health care utilisation and associated costs of GPs using direct access to brain MRI for the  
8 management of chronic headache patients compared to referral to a Neurologist.  
9  
10  
11

## 12 **Patients and Methods**

### 13 Study design and patient selection

14  
15  
16  
17 The study was an independent single-centre site, prospective, observational study. The study compared  
18 two existing clinical pathways in the management of patients with chronic headache from either GP referral  
19 to the Neurology Department or to direct access to brain MRI. No change to clinical practice was involved.  
20 Participants were allocated to two groups, the Neurology group or the MRI group. The allocation was  
21 decided *a priori*, i.e. the referrer (in this case the GP) decided which referral route would suit each  
22 participant. Subsequent care was consistent with standard of care for each clinical pathway and depicted  
23 in Figure 1.  
24  
25  
26  
27

28 Patients eligible for the study included adults aged 16 years or over with chronic headache defined as  
29 occurring  $\geq 15$  days per month for more than 3 months (as per ICHD-3 criteria) and referred from GP  
30 practices to a local Hospital in Central London, either for a Neurology outpatient appointment or an MRI  
31 exam. Participants were excluded if there were secondary causes for the headache, if they were prisoners,  
32 lacked capacity to give consent or participate in the study, not fluent in English or already taking part in a  
33 clinical trial of an investigational medicinal product. Following eligibility assessment, participants completed  
34 a written informed consent. The Health Research Authority and Research Ethics Committee (West of  
35 Scotland – REC 4) approved the study research on 12<sup>th</sup> April 2016 (REC reference 16/WS/0028).  
36  
37  
38  
39

40 This study has involved Patient and Public Involvement (PPI) during the design and dissemination phase.  
41 Prior to the start of the research, a group of patients suffering from chronic headache were consulted to co-  
42 produce the study mobile app that was used to monitor symptoms and triggers of chronic headache. The  
43 patients who were involved in the study design, as well as all study participants, received a lay summary of  
44 the research findings as per their preferences, either via post or e-mail. Research data are available upon  
45 reasonable request.  
46  
47  
48

### 49 Study outcomes

50  
51  
52 The primary outcome was to estimate the 6-month health care costs associated with two existing clinical  
53 pathways in the management of chronic headaches. Secondary outcomes comprised: the extension of the  
54  
55  
56  
57

1  
2  
3 cost analysis up to 12 months, the evaluation of access to care, patient satisfaction, headache burden and  
4 time off work associated with both clinical pathways.  
5  
6

### 7 Service use costs

8  
9 Total costs were calculated based on the multiplication of any headache-related healthcare events by the  
10 unit cost of each event. Resource use data included contacts with any NHS healthcare provider associated  
11 with the management of chronic headache. These included, among others, visits to GPs or headache  
12 clinical nurse specialist, inpatient care, neurologist or other headache-related outpatient visits (e.g.  
13 psychiatry), physiotherapist, visits to the Emergency Department (ED), advanced imaging such as  
14 Computed Tomography (CT) and MRI. Resource use data was retrieved from multiple hospital and primary  
15 care databases as well as self-reported data from participants using a participant headache diary (either  
16 paper-based or a headache mobile app). For the purposes of the primary outcome, the valuation of unit  
17 costs was, whenever possible, based on NHS Reference Costs 2016-17 [22]. Medication costs were  
18 derived from Prescription Cost Analysis [23] and estimated from clinical data, specifically secondary care  
19 clinic letters and information provided by primary care. Participants were also asked to record time off work  
20 due to headache using the weekly participant diary.  
21  
22  
23  
24  
25  
26  
27

### 28 Quality of life and headache burden

29  
30 Headache burden was assessed using validated headache questionnaires and headache diaries. The HIT-  
31 6 questionnaire measured the headache burden based on 6 questions, leading to a score range from 36 to  
32 78. The MIDAS questionnaire assessed the disability associated with the headache (ranges from 0 to 90).  
33 Furthermore, along with the headache diaries completed by participants, the MIDAS questionnaire allowed  
34 the estimate of the number of headache days per quarter (maximum of 90 days) and self-reported  
35 headache pain scores (ranging from 0, no pain at all, to 10, the worst pain ever).  
36  
37  
38  
39  
40

### 41 Access to care

42  
43 The time elapsed between the GP referral and the first appointment in each group, either the Neurology  
44 appointment or the MRI scan, was measured as a proxy for access to care. Furthermore, in the MRI group,  
45 the availability of the MRI report to the GP, rather than the actual timing of the diagnostic scan, was  
46 considered.  
47  
48  
49

### 50 Change in care management

51  
52 Change in care management in both groups was evaluated. It was considered that a change in care  
53 management occurred when patients underwent new treatment options (medication or otherwise, e.g. new  
54 headache medication, Botox treatment).  
55  
56  
57

### Patient satisfaction

Patient satisfaction was evaluated at month 3 post-recruitment using a non-validated questionnaire. This questionnaire evaluated three dimensions of analysis: (a) referral process (time elapsed between referral from primary care to initial secondary care appointment); (b) initial appointment; and (c) overall experience three months after recruitment.

### Statistical analyses

This study was observational but all analyses were based on the principle of 'intention-to-treat' so that participants recruited were included in the analysis as per the group they were recruited to, regardless of whether they actually received the intended treatment, any protocol deviations or potential losses to follow-up [24]. Given the study's time horizon of 12 months, no discounting of costs or effects were considered. Descriptive statistics on several socio-demographics baseline characteristics were included. Differences in baseline characteristics between treatment groups were compared using statistical tests: Chi-squared for categorical data, t test for Normal data and Mann-Whitney for non-Normal quantitative data. Given the skewness associated with the cost distribution, all cost differences between groups were assessed using generalised linear models (GLM) with an identity-link and gamma distribution. An identity link function instead of a log link was considered in order to avoid potential analytical biases [25, 26]. An unadjusted GLM cost analysis with the study group (MRI group vs Neurology group) as only univariate analysis was performed as the first step. Given the study's observational design, the cost difference can be impacted due to the lack of randomisation [27]. Baseline variables that differed between the two groups ( $p < 0.1$ ) were included in the multivariable (adjusted) GLM analyses. For all GLM analyses, group difference estimates and associated confidence intervals were reported, together with p-values. Analyses were conducted using Stata version 15.

### Sample size

The sample size estimate was calculated based on the primary endpoint, total 6-month health care costs. A total of 150 participants were recruited in the Neurology group and 99 participants in the MRI group to achieve a detection a cost difference of £300 assuming standard deviations of £750 and £500, respectively, with 85% power at the 5% two-sided significance level. A 20% increase in sample size due to unknown cost distribution and attrition rate was considered.

## **Results**

A total of 249 participants were recruited, 150 in the Neurology group and 99 in the MRI group. 100% ( $n=128$ ) and 97% ( $n=96$ ) of participants recruited received the treatment allocation in the Neurology and the MRI group, respectively (Figure 2). With regards to the follow-up duration, 15% ( $n=22$ ) and 4.0% ( $n=4$ )



1  
2  
3 participants withdrew from the Neurology and MRI group, respectively, and were considered lost to follow-  
4 up. Remaining participants (n=223) were included in the analysis, equivalent to 128 (85%) and 95 (96%)  
5 participants in the Neurology and MRI group, respectively.  
6  
7

8 Baseline socio-demographic, clinical variables and resource use in the twelve months pre-recruitment are  
9 detailed in Table 1. A higher proportion of females were recruited to the Neurology group compared to the  
10 MRI group (81% vs 68%, p=0.039). Both groups were similar in mean age, ethnic mix, with more than half  
11 being White. No significant differences between the groups were found in terms of highest qualification and  
12 employment, with high-school and full-time employment being the most common. In terms of clinical  
13 variables, no significant difference between groups were found in terms of number of active health problems  
14 or number of headache triggers. Participants in the Neurology group reported lower utility and health scores  
15 using the generic EQ-5D-5L questionnaire, with a statistically significant difference in health scores  
16 (p=0.005). Lower health scores imply lower self-rated quality of life, while for the headache-specific  
17 questionnaires [Headache Impact Test (HIT-6) and Migraine Disability Assessment (MIDAS)], a higher  
18 score implies a higher headache burden. Compared to the MRI group, participants in the Neurology group  
19 reported significantly higher headache burden (HIT-6 mean score: 65 vs 63, p=0.006), number of headache  
20 days in the past 3 months (MIDAS questionnaire: 52 vs 43, p=0.038). Participants in the Neurology group  
21 also had significantly more primary care appointments (3.7 vs 2.4, p<0.001) and all NHS appointments (4.3  
22 vs 2.5, p<0.001).  
23  
24  
25  
26  
27  
28  
29  
30

### 31 Service use

32  
33 Table 2 summarises the NHS resource use of primary care and hospital-based services over a period of  
34 12 months following recruitment. With regards to primary care utilisation, participants in the Neurology  
35 group had a significantly higher number of GP face-to-face appointments (mean number per participant:  
36 1.82 vs 1.19, p=0.006). Regarding secondary care, participants in the Neurology group had a higher mean  
37 number of outpatient appointments (2.52 vs 0.26, p<0.001) and other treatments such as Botox and nerve  
38 root injection (mean 0.30 vs 0.05, p<0.001). In contrast, they had a lower mean number of brain MRIs (0.59  
39 vs 1.05, p<0.001). There were no statistically significant differences in the utilisation levels of any of the  
40 other healthcare events.  
41  
42  
43  
44

45  
46 The NHS resource use pre and post-recruitment for both groups was also compared. Table 3 summarises  
47 the difference between headache-related events 12 months post-recruitment compared to the 12 months  
48 pre-recruitment. A reduction of 197 and 87 GP visits (mean 1.54/0.92 per participant or a percentage  
49 reduction of 85%/77%) was noted in the Neurology and MRI group, respectively. Similarly, there was a  
50 reduction in emergency department utilisation with a decrease of 23 and 6 episodes (mean 0.18 and 0.07  
51 per participant or a percentage reduction of 288% and 120%) in the Neurology and MRI group, respectively.  
52  
53  
54

### 55 Cost analyses

1  
2  
3 The mean (SD) cost management per participant at 6 months post-recruitment was lower in the MRI group  
4 compared to the Neurology group [£245 (£172) vs £578 (£420)], leading to a mean cost difference between  
5 groups of -£333 per participant (95% CI: -£413 to -£253,  $p<0.001$ ). The MRI group had a higher proportion  
6 of participants with lower costs (£0 to £250 range) than the Neurology group (73% vs 4.7%). The initial cost  
7 analysis was extended to 12 months post-recruitment and the mean cost difference between groups  
8 increased, with the MRI group generating cost savings of £518 per participant (95% CI: -£637 to -£401,  
9  $p<0.001$ ).

10  
11  
12  
13  
14  
15 Given the non-randomised study design, an additional GLM analysis was performed to adjust for baseline  
16 characteristics. The unadjusted 6-month cost difference between groups (-£333; 95% CI: -£413, -£253)  
17 hardly changed after adjustment (-£308; 95% CI: -£408, -£209). In all analyses, at both 6 and 12 months  
18 post-recruitment, direct access to MRI for the management of chronic headache was associated with  
19 statistically significant mean cost savings for the NHS.  
20  
21

#### 22 23 Abnormal findings in the MRI group

24  
25 Out of the 95 participants recruited in the MRI group, three MRIs were not performed during the initial  
26 appointment due to claustrophobia events. From a total number of 92 MRIs, 85 (92%) were normal and 7  
27 (7.6%) presented abnormal findings (Table 4), with one diagnosis being particularly significant (two small  
28 intracranial aneurysms). This participant was referred to neurovascular team for assessment, at which point  
29 no intervention was performed during the follow-up period (participant included in an active surveillance  
30 group). Two other participants had a change in their clinical management for less significant findings,  
31 leading to either a follow-up appointment or scan. No brain malignancies were diagnosed.  
32  
33

#### 34 35 Access to care

36  
37 The mean time (SD) elapsed from GP referral to the initial Neurology and MRI scan was, respectively, 110  
38 (35) days and 39 days (17), a statistically significant difference ( $p<0.001$ ). Second, if the MRI report, than  
39 the actual scan, is considered as a proxy for access to care, the mean time elapsed was 70 days (35)  
40 ( $p<0.001$ ).

#### 41 42 Change in management

43  
44 Participants in the Neurology group were more likely to have a change in therapeutic management  
45 compared to participants in the MRI group (97% vs 64%,  $p<0.001$ ). Similarly, among participants that had  
46 not started on preventative medication pre-recruitment, a higher proportion of participants in the Neurology  
47 group were started on preventative medication as part of their clinical management (93% vs 53%,  $p<0.001$ ).

#### 48 49 Quality of life and headache burden

1  
2  
3 At baseline, mean utility was lower in the Neurology group but not significant (mean utility of 0.809 vs 0.830,  
4  $p=0.097$ ), while their self-perceived mean health score was significantly lower (EQ-5D-5L: visual analogue  
5 scale score of 64.0 vs 70.8,  $p=0.005$ ) (Table 5). There was no statistically significant differences between  
6 the groups at 6 months for to the utility and self-reported healthcare scores.  
7  
8

9  
10 At baseline, participants in the Neurology group presented a higher headache burden compared to the MRI  
11 group (mean score of 65.0 vs 62.6,  $p=0.006$ ) (Table 5). This trend seemed to be maintained over the follow-  
12 up period but was difficult to interpret due to high attrition rates: mean HIT-6 score at 6 months (60.0 vs  
13 53.1,  $p=0.968$ ). At baseline, participants in the Neurology group had higher headache severity compared  
14 to the MRI group, but this was not significant (mean MIDAS score of 57.8 vs 44.8,  $p=0.075$ ) (Table 5). In  
15 both groups the headache severity decreased over the follow-up period. At baseline, participants in the  
16 Neurology group reported a significantly higher mean number of headache days compared to the MRI  
17 group (51.6 vs 42.8,  $p=0.038$ ). This trend was observed at month 6 but was not significant (41.2 vs 26.5,  
18  $p=0.152$ ). A third variable assessed self-reported headache pain scores. At baseline, participants at  
19 baseline showed almost identical mean headache pain scores (6.9 vs 6.9,  $p=0.827$ ). During the follow-up  
20 period, no statistical differences were found at month 6 (4.5 vs 4.2,  $p=0.663$ ).  
21  
22  
23  
24  
25  
26  
27

### 28 Time off work

29  
30 Participants in the Neurology group ( $n=83$ ) had higher mean number of days off work due to headache  
31 compared to participants in the MRI group ( $n=35$ ) but these were not statistically significant at 6 (13.9 vs  
32 9.7,  $p=0.563$ ) or 12 months (27.9 vs 19.1,  $p=0.808$ ) post-recruitment.  
33  
34  
35

### 36 Patient satisfaction

37  
38 Patient satisfaction was evaluated at month 3 post-recruitment using a non-validated questionnaire  
39 (Appendix I). Participants in both groups reported no difference in terms of receiving an appointment in a  
40 suitable timeframe ( $p=0.193$ ). Participants in the MRI group reported higher satisfaction levels ( $p=0.005$ )  
41 compared to the Neurology group associated with the information received prior to the actual appointment.  
42 No statistically significant difference ( $p=0.366$ ) between the groups was found regarding the satisfaction  
43 levels of both appointments (either MRI scan or Neurologist appointment) but a higher proportion of  
44 participants in the Neurology group reported a better experience compared to their expectation ( $p=0.002$ ).  
45 At month 3 post-recruitment in all variables, except frequency of appointments ( $p=0.166$ ), participants in  
46 the Neurology group reported higher levels of satisfaction with: amount of time spent with clinical staff  
47 ( $p=0.001$ ); consistency of care ( $p=0.028$ ); how informed you felt about your condition ( $p=0.010$ ) / your  
48 treatment ( $p=0.004$ ); and the overall experience ( $p<0.001$ ).  
49  
50  
51  
52  
53  
54  
55

## 56 **Discussion**

1  
2  
3 Previous UK studies assessed the use of direct access to advanced imaging in the management of chronic  
4 headache patients [10, 21]. Howard et al. (2005) performed a randomised controlled trial, which showed  
5 that the use of imaging in patients led to a reduction of referral rates to Neurology services in secondary  
6 care from 23% to 1.3% (1/76) in the treatment group (i.e. patients being scanned) [21]. Thomas et al. (2010)  
7 estimated that direct access to brain imaging, in this case CT, reduced referral rates to Neurology in 86%  
8 of the cases during the follow-up period (average of 1.3 years per patient) [10].  
9  
10  
11  
12

13 The study's underlying hypothesis was that the early use of an advanced and accurate diagnostic tool (in  
14 this case MRI) would reassure both patients and GPs that no serious underlying cause (particularly brain  
15 tumour) is present. This would in turn reduce the headache burden and NHS resource use associated with  
16 the patient's subsequent management. Given the high prevalence of headache and the increased referral  
17 of patients with chronic headaches and other neurological conditions from primary care to hospital based  
18 care [7], it is relevant to assess the implications of using different management strategies. To our  
19 knowledge, no previous prospective study in the UK has assessed the economic implications of these two  
20 coexisting management strategies based on GP referral decision.  
21  
22  
23  
24  
25

26 The primary outcome was total costs at six months post-recruitment. The study showed that the use of  
27 advanced imaging produced cost-savings to the NHS compared to referral to Neurology, with mean cost-  
28 savings per participant of £333 and £518 at month 6 and 12 post-recruitment, respectively ( $p < 0.001$ ). These  
29 cost differences were multifactorial but primarily driven by: (i) the lower unit cost of a brain MRI scan (£146)  
30 compared to the initial Neurology appointment (£240); (ii) the lower number of outpatient appointments in  
31 the MRI group (25 vs 322); (iii) the fact that 75/128 (59%) of participants in the Neurology group ended up  
32 having a brain MRI scan in the 12-month period of follow-up; and (iv) the increased likelihood of patients in  
33 the Neurology arm receiving management with Botox injections or nerve block procedures (39 vs 5 events).  
34 Direct access to brain MRI seemed to reassure most participants as only 17 (18%) participants in the MRI  
35 group ended up being referred to a neurologist. Furthermore over 66% of participants in the MRI group had  
36 no further hospital-based care, compared to 5% in the Neurology group. Similarly, at primary care level,  
37 participants in the MRI group presented lower utilisation rates per participant when compared to the  
38 Neurology group (mean GP appointments of 1.82 vs 1.19,  $p = 0.006$ ). In order to mitigate the potential  
39 confounding by indication introduced by GPs referring patients to both clinical pathways, adjusted GLMs  
40 were conducted. All cost differences between groups remained statistically significant ( $p < 0.001$ ) when  
41 adjusted for differences in baseline characteristics or follow-up attrition rates.  
42  
43  
44  
45  
46  
47  
48  
49

50 At baseline, participants in the Neurology group presented lower self-reported quality of life and higher  
51 headache burden. HIT-6 scores did improve over time but we were unable to assess whether there was a  
52 statistically significant difference in both groups due to the high attrition rates, particularly in the MRI group.  
53 As mentioned, out of the 95 participants recruited to the MRI group, 17 (18%) were subsequently referred  
54 to a Neurologist. Interestingly, at baseline, these 17 patients reported higher headache burden compared  
55  
56  
57  
58  
59  
60

1  
2  
3 to all 95 patients recruited to the MRI group (MIDAS score: 51.2 vs 44.8; MIDAS headache days: 55.8 vs  
4 42.8). This finding seems to suggest that this data might be useful to risk stratify patients and support GPs  
5 in their referral criteria. However, further research into this area is required.  
6  
7

8 Participants in the Neurology group presented a higher probability of being started on a preventative  
9 medication and had a change in therapeutic management following referral from primary care. A small  
10 proportion (7.6%) of participants in the MRI group had abnormal findings in the initial brain MRI. Only one  
11 participant had clinically significant lesions (two small aneurysms) which were also incidental and no brain  
12 tumour was diagnosed.  
13  
14  
15

16 Time off work was also evaluated as a proxy of headache burden. Participants in the Neurology group  
17 presented a trend ( $p>0.05$ ) of higher number of days off work due to headache compared to participants in  
18 the MRI group. This difference was not however statistically significant.  
19  
20

21 Lastly, patient satisfaction in both groups was compared based on three dimensions of analysis: during the  
22 referral period, the initial appointment and overall satisfaction. Twenty five percent of participants in the  
23 Neurology group (vs 18% in the MRI group) reported dissatisfaction with the waiting time. This finding is  
24 not unexpected as the mean waiting time associated with the Neurology appointment was almost three  
25 times of the one associated with the MRI scan (110 vs 39 days). Contrary to the referral period, participants  
26 in the Neurology group reported trends of higher satisfaction levels associated with the first appointment  
27 (neurology outpatient visit vs MRI scan) and a better experience compared to their expectations (60% vs  
28 29% in the Neurology and MRI group, respectively). Participants in the Neurology group reported improved  
29 satisfaction levels at 3 months across different variables (time spent with clinician, consistency of care,  
30 information about the condition and its treatment). Almost three quarters of Neurology participants reported  
31 being satisfied or very satisfied with their headache management compared to only 21% in the MRI group  
32 ( $p<.001$ ). Both participants and GP referrers in the MRI group reported dissatisfaction associated with the  
33 waiting time elapsed between the MRI scan and the availability of results (mean time of 31 days). This  
34 might have contributed to increased anxiety in some participants.  
35  
36  
37  
38  
39  
40  
41  
42

#### 43 *Strengths of this study:* 44

45 The estimate of NHS resource use data was primarily based on comprehensive and complete data retrieved  
46 from hospital-based databases that captured both the acute and elective elements of the pathway  
47 associated with the management of patients with chronic headache. This data was supplemented by both  
48 primary care utilisation data, collected from each participant's GP, and self-reported participant data. The  
49 aim was to guarantee that any chronic headache related NHS event was costed regardless of the  
50 healthcare provider and its location. The prospective collection of health care utilisation and the evaluation  
51 of the impact of the interventions across different dimensions of analysis (efficiency, quality of care, access  
52 to care and patient satisfaction) were other key factors that contributed to the overall strength of the study.  
53  
54  
55  
56  
57

### Limitations of this study:

There were some limitations to this study. First, this was a single-centre study with participants recruited from one central hospital in London. A multi-centre study would be necessary to explore the generalisability of the results. Second, as with any observational study, no randomisation between groups was performed and there were significant differences in baseline of headache burden and health-scores and utilisation of resources. In order to mitigate potential confounding factors, adjusted multivariate analyses showed that the primary outcome was hardly affected and remained statistically significant. Nevertheless, residual confounding factors remain a limitation of the study. Third, specific inclusion and exclusion criteria were considered and as such the study sample might not be representative of all patients with chronic headache. Fourth, for the purpose of secondary outcomes, most data was self-reported and hence prone to recall bias. Lastly, there were high follow-up attrition rates particularly for participants in the MRI group, which affected some of the study's secondary outcomes.

### **Conclusions**

This study found that the referral from primary care to direct access to brain MRI compared to referral for a neurologist for patients with chronic headache was associated with lower NHS overall costs at 6 and 12 months post-recruitment. Despite waiting longer from referral to appointment, participants in the Neurology group reported higher satisfaction levels associated with the care received compared to the MRI group and were more likely to benefit from changes to their therapeutic management.

### Implications for further research and clinical practice

Baseline measures of headache burden, such as the HIT-6 or MIDAS, could potentially be used to determine which pathway may be suitable for patients but further research into the risk stratification of chronic headache patients is required. Future study designs should consider the confounding by indication introduced by recruiting participants referred to the two pathways based on GP decision. With regards to clinical practice, and based on the study findings, we plan to provide GPs with headache management advice along with the MRI report.

1  
2  
3 **Author contributions:**  
4

5 **Conception and design:** T. Rua, A. A. Mazumder, Y. Akande, J. Turville, R. Razavi, JL. Peacock, P.  
6 McCrone, S. K. Afridi  
7

8 **Acquisition of data:** T. Rua, Y. Akande, C. Margariti, J Ochulor  
9

10 **Analysis and interpretation of data:** T. Rua, JL. Peacock, P. McCrone, J. Shearer  
11

12 **Drafting the manuscript:** T. Rua, A. A. Mazumder, JL. Peacock, P. McCrone, V. Goh, J. Shearer, S. K.  
13 Afridi  
14

15 **Final approval of the completed manuscript:** T. Rua, A. A. Mazumder, Y. Akande, C. Margariti, J.  
16 Turville, R. Razavi, JL. Peacock, P. McCrone, V. Goh, J. Shearer, S. K. Afridi  
17  
18  
19  
20  
21  
22  
23

24 **Competing interests:** The authors declare no conflict of interests.  
25  
26  
27  
28  
29

30 **Funding:** This work was supported by the Guy's and St Thomas' Charity.  
31  
32  
33

34 **Data sharing statement:** Research data are available upon reasonable request.  
35  
36  
37  
38  
39  
40  
41  
42  
43  
44  
45  
46  
47  
48  
49  
50  
51  
52  
53  
54  
55  
56  
57  
58  
59  
60

## References

- [1] R. Jensen and L. J. Stovner, "Epidemiology and comorbidity of headache," *Lancet Neurol.*, vol. 7, no. 4, pp. 354–361, Apr. 2008, doi: 10.1016/S1474-4422(08)70062-0.
- [2] L. Stovner *et al.*, "The global burden of headache: a documentation of headache prevalence and disability worldwide," *Cephalalgia Int. J. Headache*, vol. 27, no. 3, pp. 193–210, Mar. 2007, doi: 10.1111/j.1468-2982.2007.01288.x.
- [3] H. F. Boardman, E. Thomas, P. R. Croft, and D. S. Millson, "Epidemiology of headache in an English district," *Cephalalgia Int. J. Headache*, vol. 23, no. 2, pp. 129–137, Mar. 2003, doi: 10.1046/j.1468-2982.2003.00468.x.
- [4] T. Vos *et al.*, "Years lived with disability (YLDs) for 1160 sequelae of 289 diseases and injuries 1990–2010: a systematic analysis for the Global Burden of Disease Study 2010," *The Lancet*, vol. 380, no. 9859, pp. 2163–2196, Dec. 2012, doi: 10.1016/S0140-6736(12)61729-2.
- [5] M. Leonardi and A. Raggi, "Burden of migraine: international perspectives," *Neurol. Sci. Off. J. Ital. Neurol. Soc. Ital. Soc. Clin. Neurophysiol.*, vol. 34 Suppl 1, pp. S117-118, May 2013, doi: 10.1007/s10072-013-1387-8.
- [6] B. K. Rasmussen, R. Jensen, M. Schroll, and J. Olesen, "Epidemiology of headache in a general population--a prevalence study," *J. Clin. Epidemiol.*, vol. 44, no. 11, pp. 1147–1157, 1991.
- [7] R. Latinovic, M. Gulliford, and L. Ridsdale, "Headache and migraine in primary care: consultation, prescription, and referral rates in a large population," *J. Neurol. Neurosurg. Psychiatry*, vol. 77, no. 3, pp. 385–387, Mar. 2006, doi: 10.1136/jnnp.2005.073221.
- [8] Department of Health, "Direct Access to Diagnostic Tests for Cancer: Best Practice Referral Pathways for General Practitioners." 2012.
- [9] M. Braschinsky *et al.*, "Structured education can improve primary-care management of headache: the first empirical evidence, from a controlled interventional study," *J. Headache Pain*, vol. 17, p. 24, 2016, doi: 10.1186/s10194-016-0613-1.
- [10] R. Thomas, A. Cook, G. Main, T. Taylor, E. G. Caruana, and R. Swingler, "Primary care access to computed tomography for chronic headache," *Br. J. Gen. Pract.*, vol. 60, no. 575, pp. 426–430, Jun. 2010, doi: 10.3399/bjgp10X502146.
- [11] V. H. Patterson and T. F. Esmonde, "Comparison of the handling of neurological outpatient referrals by general physicians and a neurologist," *J. Neurol. Neurosurg. Psychiatry*, vol. 56, no. 7, p. 830, Jul. 1993.
- [12] L. Ridsdale, J. Doherty, P. McCrone, and P. Seed, "A new GP with special interest headache service: observational study," *Br. J. Gen. Pract.*, vol. 58, no. 552, pp. 478–483, Jul. 2008, doi: 10.3399/bjgp08X319440.
- [13] B. Osumili, P. McCrone, S. Cousins, and L. Ridsdale, "The Economic Cost of Patients With Migraine Headache Referred to Specialist Clinics," *Headache J. Head Face Pain*, vol. 58, no. 2, pp. 287–294, Feb. 2018, doi: 10.1111/head.13210.
- [14] L. M. Bloudek *et al.*, "Cost of healthcare for patients with migraine in five European countries: results from the International Burden of Migraine Study (IBMS)," *J. Headache Pain*, vol. 13, no. 5, pp. 361–378, Jul. 2012, doi: 10.1007/s10194-012-0460-7.
- [15] Z. Katsarava, M. Mania, C. Lampl, J. Herberhold, and T. J. Steiner, "Poor medical care for people with migraine in Europe - evidence from the Eurolight study," *J. Headache Pain*, vol. 19, no. 1, p. 10, Feb. 2018, doi: 10.1186/s10194-018-0839-1.
- [16] P. McCrone *et al.*, "Service use and costs for people with headache: a UK primary care study," *J. Headache Pain*, vol. 12, no. 6, pp. 617–623, Dec. 2011, doi: 10.1007/s10194-011-0362-0.
- [17] M. Morgan, L. Jenkins, and L. Ridsdale, "Patient pressure for referral for headache: a qualitative study of GPs' referral behaviour," *Br. J. Gen. Pract. J. R. Coll. Gen. Pract.*, vol. 57, no. 534, pp. 29–35, Jan. 2007.
- [18] R. Underwood, R. Kilner, and L. Ridsdale, "Primary care management of headaches and how direct-access MRI fits: a qualitative study of UK general practitioners' views," *BMJ Open*, vol. 7, no. 11, p. e018169, Nov. 2017, doi: 10.1136/bmjopen-2017-018169.
- [19] NICE, "Management of headaches," 2018. [Online]. Available: <https://pathways.nice.org.uk/pathways/headaches>. [Accessed: 28-Jan-2019].



- 1  
2  
3 [20] B. C. Callaghan, K. A. Kerber, R. J. Pace, L. Skolarus, W. Cooper, and J. F. Burke, "Headache  
4 neuroimaging: Routine testing when guidelines recommend against them," *Cephalalgia*, vol. 35, no.  
5 13, pp. 1144–1152, Nov. 2015, doi: 10.1177/0333102415572918.
- 6 [21] L. Howard *et al.*, "Are investigations anxiolytic or anxiogenic? A randomised controlled trial of  
7 neuroimaging to provide reassurance in chronic daily headache," *J. Neurol. Neurosurg. Psychiatry*,  
8 vol. 76, no. 11, pp. 1558–1564, Nov. 2005, doi: 10.1136/jnnp.2004.057851.
- 9 [22] NHS Improvement, "Reference costs | NHS Improvement," 2017. [Online]. Available:  
10 <https://improvement.nhs.uk/resources/reference-costs/#rc1718>. [Accessed: 31-Jul-2019].
- 11 [23] NHS Business Services Authority, "Prescription Cost Analysis (PCA) data | NHSBSA," 2018.  
12 [Online]. Available: [https://www.nhsbsa.nhs.uk/prescription-data/dispensing-data/prescription-cost-](https://www.nhsbsa.nhs.uk/prescription-data/dispensing-data/prescription-cost-analysis-pca-data)  
13 [analysis-pca-data](https://www.nhsbsa.nhs.uk/prescription-data/dispensing-data/prescription-cost-analysis-pca-data). [Accessed: 31-Jul-2019].
- 14 [24] S. K. Gupta, "Intention-to-treat concept: A review," *Perspect. Clin. Res.*, vol. 2, no. 3, pp. 109–112,  
15 2011, doi: 10.4103/2229-3485.83221.
- 16 [25] L. A. Polgreen and J. M. Brooks, "Estimating Incremental Costs with Skew: A Cautionary Note,"  
17 *Appl. Health Econ. Health Policy.*, vol. 10, no. 5, pp. 319–329, Sep. 2012, doi: 10.2165/11632430-  
18 000000000-00000.
- 19 [26] J. A. Barber and S. G. Thompson, "Analysis of cost data in randomized trials: an application of the  
20 non-parametric bootstrap," *Stat. Med.*, vol. 19, no. 23, pp. 3219–3236, 2000, doi: 10.1002/1097-  
21 0258(20001215)19:23<3219::AID-SIM623>3.0.CO;2-P.
- 22 [27] J. L. Moran, P. J. Solomon, A. R. Peisach, and J. Martin, "New models for old questions:  
23 generalized linear models for cost prediction," *J. Eval. Clin. Pract.*, vol. 13, no. 3, pp. 381–389, Jun.  
24 2007, doi: 10.1111/j.1365-2753.2006.00711.x.
- 25  
26  
27  
28  
29  
30  
31  
32  
33  
34  
35  
36  
37  
38  
39  
40  
41  
42  
43  
44  
45  
46  
47  
48  
49  
50  
51  
52  
53  
54  
55  
56  
57  
58  
59  
60

1  
2  
3  
4 Figure 1. High-level illustration of two existing clinical pathways associated with the referral from GP due  
5 to chronic headache.  
6  
7  
8  
9

10 Figure 2. Participant flow chart for the headache study.  
11  
12  
13  
14  
15  
16  
17  
18  
19  
20  
21  
22  
23  
24  
25  
26  
27  
28  
29  
30  
31  
32  
33  
34  
35  
36  
37  
38  
39  
40  
41  
42  
43  
44  
45  
46  
47  
48  
49  
50  
51  
52  
53  
54  
55  
56  
57  
58  
59  
60

For peer review only

Table 1. Baseline characteristics of the population analysed.

| Variable                                             | Neurology group (n=128) | MRI group (n=95) | p-value |
|------------------------------------------------------|-------------------------|------------------|---------|
| Age, years: mean (SD)                                | 38.4 (14.1)             | 40.0 (14.6)      | 0.514   |
| Gender Female, n (%)                                 | 103 (81)                | 65 (68)          | 0.039   |
| Ethnicity                                            |                         |                  | 0.079   |
| Asian                                                | 13 (10)                 | 6 (6.3)          |         |
| Black                                                | 40 (31)                 | 17 (18)          |         |
| White                                                | 68 (53)                 | 60 (63)          |         |
| Mixed                                                | 5 (3.9)                 | 8 (8.4)          |         |
| Other                                                | 2 (1.6)                 | 4 (4.2)          |         |
| Qualification, n (%)                                 |                         |                  | 0.565   |
| Advanced work or PhD                                 | 3 (2.3)                 | 4 (4.2)          |         |
| Master's Degree                                      | 15 (12)                 | 12 (13)          |         |
| Bachelor's Degree                                    | 31 (24)                 | 29 (31)          |         |
| High School                                          | 57 (45)                 | 33 (35)          |         |
| Did not finish High School                           | 8 (6.3)                 | 10 (11)          |         |
| Prefer not to answer                                 | 14 (11)                 | 7 (7.4)          |         |
| Employment, n (%)                                    |                         |                  | 0.839   |
| Employee in full time job (30 hours or more a week)  | 50 (39)                 | 36 (38)          |         |
| Employee in part-time job (under 30 hours a week)    | 18 (14)                 | 18 (19)          |         |
| Self-employed, full or part time                     | 12 (9.4)                | 8 (8.4)          |         |
| Full-time education at school, college or university | 16 (13)                 | 9 (9.5)          |         |
| Doing something else                                 | 2 (1.6)                 | 2 (2.1)          |         |
| Permanently sick/ disabled                           | 8 (6.3)                 | 6 (6.3)          |         |
| Looking after the home                               | 4 (3.1)                 | 6 (6.3)          |         |
| Unemployed and available for work                    | 12 (9.4)                | 6 (6.3)          |         |
| Wholly retired from work                             | 4 (3.1)                 | 4 (4.2)          |         |
| Prefer not to answer                                 | 2 (1.6)                 | 0 (0)            |         |
| Presence of mental health condition, n (%)           | 22 (17)                 | 11 (12)          | 0.243   |
| Number of active health problems: mean (SD)          | 2.0 (1.5)               | 1.8 (1.4)        | 0.277   |
| Number of headache triggers: mean (SD)               | 2.1 (1.8)               | 1.8 (1.4)        | 0.378   |
| Self-reported questionnaires                         |                         |                  |         |
| EQ-5D-5L: mean utility (SD)                          | 0.809 (0.182)           | 0.830 (0.195)    | 0.097   |
| EQ-5D-5L: mean score (SD)                            | 64 (19)                 | 71 (20)          | 0.005   |
| HIT-6: mean score (SD)                               | 65 (5.3)                | 63 (7.3)         | 0.006   |
| MIDAS, mean score (SD)                               | 58 (54)                 | 45 (45)          | 0.075   |
| MIDAS, mean headache days (SD)                       | 52 (32)                 | 43 (31)          | 0.038   |
| MIDAS, mean pain score (SD)                          | 6.9 (1.8)               | 6.9 (1.9)        | 0.778   |
| Resource use in the 12 months prior to recruitment   |                         |                  |         |
| GP appointments: mean (SD)                           | 3.7 (2.9)               | 2.4 (1.5)        | <0.001  |
| All NHS events: mean (SD)                            | 4.3 (3.7)               | 2.5 (1.5)        | <0.001  |

SD= Standard deviation; EQ-5D-5L - 5 level EQ-5D; HIT-6 = headache impact test; MIDAS = Migraine Disability assessment scale

Table 2. Breakdown of number of NHS appointments per type of activity organised per group and respective number of participants responsible for these appointments (12 months post-recruitment).

| Type of NHS appointment                            | Neurology group (n=128) |             |           | MRI group (n=95)  |             |          | p-value |
|----------------------------------------------------|-------------------------|-------------|-----------|-------------------|-------------|----------|---------|
|                                                    | Total of episodes       | Mean (SD)   | N (%)     | Total of episodes | Mean (SD)   | N (%)    |         |
| <i>Primary Care services</i>                       |                         |             |           |                   |             |          |         |
| GP face-to-face appointment                        | 233                     | 1.82 (2.11) | 91 (71)   | 113               | 1.19 (1.64) | 57 (60)  | 0.006   |
| GP phone appointment                               | 37                      | 0.29 (0.75) | 24 (19)   | 25                | 0.26 (0.49) | 23 (24)  | 0.420   |
| <i>Hospital based services</i>                     |                         |             |           |                   |             |          |         |
| Hospital outpatient appointment                    | 322                     | 2.52 (1.19) | 128 (100) | 25                | 0.26 (0.55) | 20 (21)  | <0.001  |
| Inpatient episode                                  | 4                       | 0.03 (0.35) | 1 (0.8)   | 1                 | 0.01 (0.10) | 1 (1.1)  | 0.837   |
| Emergency Department episode                       | 8                       | 0.06 (0.24) | 8 (6.3)   | 5                 | 0.05 (0.22) | 5 (5.3)  | 0.756   |
| Head CT                                            | 1                       | 0.01 (0.09) | 1 (0.8)   | 1                 | 0.01 (0.10) | 1 (1.1)  | 0.832   |
| Brain MRI                                          | 75                      | 0.59 (0.49) | 75 (59)   | 100               | 1.05 (0.30) | 95 (100) | <0.001  |
| Others (e.g. botox and nerve injection treatments) | 39                      | 0.30 (0.79) | 25 (20)   | 5                 | 0.05 (0.30) | 3 (3.2)  | <0.001  |

Table 3. Difference in the number, mean and percentage reduction of NHS appointments per type of activity organised per group 12 months post-recruitment compared to the 12 months pre-recruitment (note: a negative/positive percentage denotes a decrease/increase in activity following recruitment).

| Type of NHS appointment         | Neurology group (n=128) |       |       | MRI group (n=95)  |       |       |
|---------------------------------|-------------------------|-------|-------|-------------------|-------|-------|
|                                 | Total of episodes       | Mean  | %     | Total of episodes | Mean  | %     |
| <i>Primary Care services</i>    |                         |       |       |                   |       |       |
| GP face-to-face appointment     | -197                    | -1.54 | -85%  | -87               | -0.92 | -77%  |
| GP phone appointment            | -11                     | -0.09 | -30%  | 5                 | 0.05  | 20%   |
| <i>Hospital-based services</i>  |                         |       |       |                   |       |       |
| Hospital outpatient appointment | 301                     | 2.36  | 93%   | 23                | 0.24  | 92%   |
| Inpatient episode               | 3                       | 0.02  | 75%   | 1                 | 0.01  | 100%  |
| Emergency Department episode    | -23                     | -0.18 | -288% | -6                | -0.07 | -120% |
| Head CT                         | -9                      | -0.07 | -12%  | 1                 | 0.01  | 1.0%  |
| Brain MRI                       | 55                      | 0.43  | 141%  | 100               | 1.05  | N/A   |

Table 4. Description of incidental findings, its clinical relevance and subsequent pathway.

| <b>Abnormal findings</b>                                          | <b>Significant (Yes/No)?</b> | <b>Changes in diagnostic or treatment pathway</b>         |
|-------------------------------------------------------------------|------------------------------|-----------------------------------------------------------|
| Mature striatocapsular lacune                                     | No                           |                                                           |
| Sinusitis with complete opacification                             | No                           | ENT review only.                                          |
| Pituitary abnormality (T1)                                        | No                           |                                                           |
| Low lying cerebellar tonsils                                      | No                           |                                                           |
| Previous petrous surgery noted                                    | No                           |                                                           |
| Two aneurysms AcomA (anterior communicating artery) and right ICA | Yes                          | Referred to neurovascular – no coiling (no intervention). |
| No definitive lesion                                              | No                           | Follow-up MRI only.                                       |

Table 5. Descriptive statistics for one generic questionnaire (EQ-5D-5L) and two headache-specific questionnaires (HIT-6 and MIDAS) at baseline and 6 months post-recruitment.

|                 |                 |               | N         | Mean | Standard Deviation | p-value |       |
|-----------------|-----------------|---------------|-----------|------|--------------------|---------|-------|
| <b>BASELINE</b> | <b>EQ-5D-5L</b> | Utility       | Neurology | 127  | 0.809              | 0.182   | 0.097 |
|                 |                 |               | Radiology | 95   | 0.830              | 0.195   |       |
|                 | Score           | Neurology     | 126       | 64.0 | 18.8               | 0.005   |       |
|                 |                 | Radiology     | 95        | 70.8 | 20.2               |         |       |
|                 | <b>HIT-6</b>    | Score         | Neurology | 128  | 65.0               | 5.3     | 0.006 |
|                 |                 |               | Radiology | 92   | 62.6               | 7.3     |       |
|                 | Score           | Neurology     | 124       | 57.8 | 54.0               | 0.075   |       |
|                 |                 | Radiology     | 90        | 44.8 | 44.9               |         |       |
|                 | <b>MIDAS</b>    | Headache days | Neurology | 124  | 51.6               | 31.5    | 0.038 |
|                 |                 |               | Radiology | 90   | 42.8               | 30.7    |       |
|                 |                 | Pain score    | Neurology | 124  | 6.9                | 1.8     | 0.778 |
|                 |                 |               | Radiology | 90   | 6.9                | 1.9     |       |
| <b>MONTH 6</b>  | <b>EQ-5D-5L</b> | Utility       | Neurology | 55   | 0.770              | 0.263   | 0.243 |
|                 |                 |               | Radiology | 26   | 0.681              | 0.346   |       |
|                 | Score           | Neurology     | 53        | 68.2 | 20.6               | 0.463   |       |
|                 |                 | Radiology     | 23        | 62.5 | 24.7               |         |       |
|                 | <b>HIT-6</b>    | Score         | Neurology | 35   | 60.0               | 8.7     | 0.968 |
|                 |                 |               | Radiology | 12   | 53.1               | 22.8    |       |
|                 | Score           | Neurology     | 32        | 52.6 | 58.1               | 0.827   |       |
|                 |                 | Radiology     | 12        | 40.7 | 36.0               |         |       |
|                 | <b>MIDAS</b>    | Headache days | Neurology | 46   | 41.2               | 28.6    | 0.152 |
|                 |                 |               | Radiology | 15   | 26.5               | 28.1    |       |
|                 |                 | Pain score    | Neurology | 44   | 4.5                | 2.3     | 0.663 |
|                 |                 |               | Radiology | 15   | 4.2                | 2.0     |       |

1  
2  
3  
4  
5  
6  
7  
8  
9  
10  
11  
12  
13  
14  
15  
16  
17  
18  
19  
20  
21  
22  
23  
24  
25  
26  
27  
28  
29  
30  
31  
32  
33  
34  
35  
36  
37  
38  
39  
40  
41  
42  
43  
44  
45  
46  
47  
48  
49  
50  
51  
52  
53  
54  
55  
56  
57  
58  
59  
60

For peer review only



1  
2  
3  
4  
5  
6  
7  
8  
9  
10  
11  
12  
13  
14  
15  
16  
17  
18  
19  
20  
21  
22  
23  
24  
25  
26  
27  
28  
29  
30  
31  
32  
33  
34  
35  
36  
37  
38  
39  
40  
41  
42  
43  
44  
45  
46  
47  
48  
49  
50  
51  
52  
53  
54  
55  
56  
57  
58  
59  
60

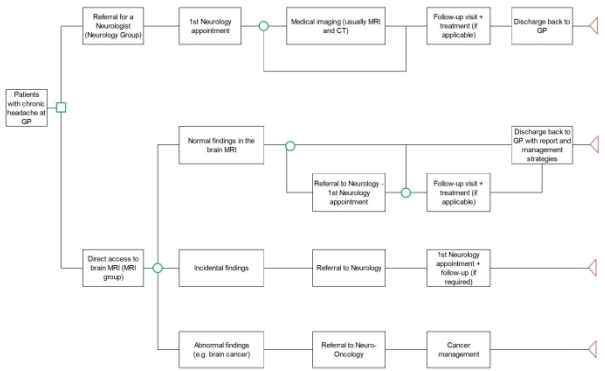

Figure 1. High-level illustration of two existing clinical pathways associated with the referral from GP due to chronic headache.

338x190mm (300 x 300 DPI)

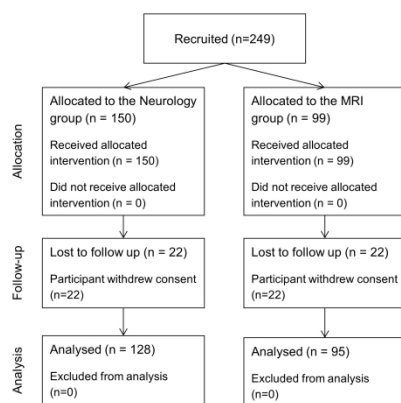

Figure 2. Participant flow chart for the headache study.

338x190mm (300 x 300 DPI)

## Appendix I. Patient satisfaction.

This questionnaire evaluated three dimensions of analysis: (a) referral process (time elapsed between referral from primary care to initial secondary care appointment); (b) initial appointment; and (c) overall experience three months after recruitment.

**(a):** Patient experience questionnaire associated with the referral process to either Neurology (n=99) or Radiology (n=79).

|                                                                        |                  | Not sure |      | Yes |     | No |     | p-value |
|------------------------------------------------------------------------|------------------|----------|------|-----|-----|----|-----|---------|
|                                                                        |                  | N        | %    | N   | %   | N  | %   |         |
| Did you receive your appointment within a timeframe acceptable to you? | Neurology (n=99) | 8        | 8.1% | 66  | 67% | 25 | 25% | 0.193   |
|                                                                        | Radiology (n=79) | 3        | 3.8% | 62  | 79% | 14 | 18% |         |

|                                                                  |                  | Very satisfied |     | Satisfied |     | Neutral |     | Dissatisfied |      | Very dissatisfied |      | p-value |
|------------------------------------------------------------------|------------------|----------------|-----|-----------|-----|---------|-----|--------------|------|-------------------|------|---------|
|                                                                  |                  | N              | %   | N         | %   | N       | %   | N            | %    | N                 | %    |         |
| How satisfied were with the information you received beforehand? | Neurology (n=98) | 25             | 26% | 48        | 49% | 22      | 22% | 3            | 3.1% | 0                 | 0%   | 0.005   |
|                                                                  | Radiology (n=79) | 38             | 50% | 24        | 32% | 10      | 13% | 2            | 2.6% | 2                 | 2.6% |         |

**(b):** Patient experience questionnaire associated with either the Neurology (n=99) or the Radiology (n=50) appointment.

|                                    |                  | Very satisfied |     | Satisfied |     | Neutral |      | Dissatisfied |      | Very dissatisfied |    | p-value |
|------------------------------------|------------------|----------------|-----|-----------|-----|---------|------|--------------|------|-------------------|----|---------|
|                                    |                  | N              | %   | N         | %   | N       | %    | N            | %    | N                 | %  |         |
| How you found the process overall? | Neurology (n=98) | 55             | 56% | 36        | 36% | 5       | 5.1% | 3            | 3.0% | 0                 | 0% | 0.366   |
|                                    | Radiology (n=50) | 27             | 54% | 22        | 44% | 0       | 0.0% | 1            | 2.0% | 0                 | 0% |         |

|                                                                         |                  | A better experience |     | About the same as expected |     | A worse experience |      | p-value |
|-------------------------------------------------------------------------|------------------|---------------------|-----|----------------------------|-----|--------------------|------|---------|
|                                                                         |                  | N                   | %   | N                          | %   | N                  | %    |         |
| How did you find the experience in comparison to what you had expected? | Neurology (n=95) | 57                  | 60% | 35                         | 37% | 3                  | 3.2% | 0.002   |
|                                                                         | Radiology (n=45) | 13                  | 29% | 31                         | 69% | 1                  | 2.2% |         |

(c): Overall patient experience questionnaire at 3 months post-recruitment with either the Neurology (n=56) or the Radiology (n=14) appointment.

|                                            |                  | Very satisfied |      | Satisfied |      | Neutral |     | Dissatisfied |       | Very dissatisfied |      | p-value |
|--------------------------------------------|------------------|----------------|------|-----------|------|---------|-----|--------------|-------|-------------------|------|---------|
|                                            |                  | N              | %    | N         | %    | N       | %   | N            | %     | N                 | %    |         |
| Amount of time spent with clinical staff   | Neurology (n=56) | 20             | 36%  | 30        | 54%  | 6       | 11% | 0            | 0%    | 0                 | 0%   | 0.001   |
|                                            | Radiology (n=14) | 3              | 21%  | 3         | 21%  | 5       | 36% | 1            | 7.1%  | 2                 | 14%  |         |
| Consistency of care                        | Neurology (n=29) | 16             | 55%  | 0         | 0%   | 12      | 41% | 1            | 3.4%  | 0                 | 0%   | 0.028   |
|                                            | Radiology (n=14) | 2              | 14%  | 3         | 21%  | 6       | 43% | 2            | 14.3% | 1                 | 7.1% |         |
| Frequency of appointments                  | Neurology (n=55) | 9              | 16%  | 19        | 35%  | 22      | 40% | 4            | 7.3%  | 1                 | 1.8% | 0.166   |
|                                            | Radiology (n=14) | 2              | 14%  | 1         | 7.1% | 7       | 50% | 3            | 21%   | 1                 | 7.1% |         |
| How informed you felt about your condition | Neurology (n=54) | 15             | 28%  | 24        | 44%  | 9       | 17% | 5            | 9.3%  | 1                 | 1.9% | 0.010   |
|                                            | Radiology (n=13) | 2              | 15%  | 2         | 15%  | 5       | 39% | 1            | 7.7%  | 3                 | 23%  |         |
| How informed you felt about your treatment | Neurology (n=55) | 15             | 27%  | 18        | 33%  | 17      | 31% | 4            | 7.3%  | 1                 | 1.8% | 0.004   |
|                                            | Radiology (n=14) | 1              | 7.1% | 1         | 7.1% | 5       | 36% | 5            | 36%   | 2                 | 14%  |         |
| Your overall experience                    | Neurology (n=55) | 13             | 24%  | 32        | 58%  | 7       | 13% | 3            | 5.5%  | 0                 | 0%   | <0.001  |
|                                            | Radiology (n=14) | 2              | 14%  | 1         | 7.1% | 9       | 64% | 1            | 7.1%  | 1                 | 7.1% |         |

# Reporting checklist for quality improvement study.

Based on the SQUIRE guidelines.

## Instructions to authors

Complete this checklist by entering the page numbers from your manuscript where readers will find each of the items listed below.

Your article may not currently address all the items on the checklist. Please modify your text to include the missing information. If you are certain that an item does not apply, please write "n/a" and provide a short explanation.

Upload your completed checklist as an extra file when you submit to a journal.

In your methods section, say that you used the SQUIRE reporting guidelines, and cite them as:

Ogrinc G, Davies L, Goodman D, Batalden P, Davidoff F, Stevens D. SQUIRE 2.0 (Standards for Quality Improvement Reporting Excellence): revised publication guidelines from a detailed consensus process

|                    | Reporting Item                                                                                                                                                                                                         | Page Number |
|--------------------|------------------------------------------------------------------------------------------------------------------------------------------------------------------------------------------------------------------------|-------------|
| <b>Title</b>       |                                                                                                                                                                                                                        |             |
| <a href="#">#1</a> | Indicate that the manuscript concerns an initiative to improve healthcare (broadly defined to include the quality, safety, effectiveness, patientcenteredness, timeliness, cost, efficiency, and equity of healthcare) | 1           |

## Abstract

[#02a](#) Provide adequate information to aid in searching and indexing 4

[#02b](#) Summarize all key information from various sections of the text using the abstract format of the intended publication or a structured summary such as: background, local problem, methods, interventions, results, conclusions 4

## Introduction

[#3](#) Nature and significance of the local problem description 6

[#4](#) Available knowledge Summary of what is currently known about the problem, including relevant previous studies 6

[#5](#) Rationale Informal or formal frameworks, models, concepts, and / or theories used to explain the problem, any reasons or assumptions that were used to develop the intervention(s), and reasons why the intervention(s) was expected to work 6-7

[#6](#) Specific aims Purpose of the project and of this report 7

## Methods

[#7](#) Context Contextual elements considered important at the outset of introducing the intervention(s) 7

[#08a](#) Intervention(s) Description of the intervention(s) in sufficient detail that others could reproduce it 7

|    |                 |                      |                                                                   |     |
|----|-----------------|----------------------|-------------------------------------------------------------------|-----|
| 1  | Intervention(s) | <a href="#">#08b</a> | Specifics of the team involved in the work                        | 7   |
| 2  |                 |                      |                                                                   |     |
| 3  |                 |                      |                                                                   |     |
| 4  | Study of the    | <a href="#">#09a</a> | Approach chosen for assessing the impact of the                   | 7-8 |
| 5  |                 |                      |                                                                   |     |
| 6  | Intervention(s) |                      | intervention(s)                                                   |     |
| 7  |                 |                      |                                                                   |     |
| 8  |                 |                      |                                                                   |     |
| 9  | Study of the    | <a href="#">#09b</a> | Approach used to establish whether the observed outcomes          | 8-9 |
| 10 |                 |                      |                                                                   |     |
| 11 | Intervention(s) |                      | were due to the intervention(s)                                   |     |
| 12 |                 |                      |                                                                   |     |
| 13 |                 |                      |                                                                   |     |
| 14 |                 |                      |                                                                   |     |
| 15 | Measures        | <a href="#">#10a</a> | Measures chosen for studying processes and outcomes of            | 7-8 |
| 16 |                 |                      |                                                                   |     |
| 17 |                 |                      | the intervention(s), including rationale for choosing them,       |     |
| 18 |                 |                      |                                                                   |     |
| 19 |                 |                      | their operational definitions, and their validity and reliability |     |
| 20 |                 |                      |                                                                   |     |
| 21 |                 |                      |                                                                   |     |
| 22 |                 |                      |                                                                   |     |
| 23 | Measures        | <a href="#">#10b</a> | Description of the approach to the ongoing assessment of          | 7-8 |
| 24 |                 |                      |                                                                   |     |
| 25 |                 |                      | contextual elements that contributed to the success, failure,     |     |
| 26 |                 |                      |                                                                   |     |
| 27 |                 |                      | efficiency, and cost                                              |     |
| 28 |                 |                      |                                                                   |     |
| 29 |                 |                      |                                                                   |     |
| 30 | Measures        | <a href="#">#10c</a> | Methods employed for assessing completeness and                   | 7-8 |
| 31 |                 |                      |                                                                   |     |
| 32 |                 |                      | accuracy of data                                                  |     |
| 33 |                 |                      |                                                                   |     |
| 34 |                 |                      |                                                                   |     |
| 35 |                 |                      |                                                                   |     |
| 36 | Analysis        | <a href="#">#11a</a> | Qualitative and quantitative methods used to draw                 | 8-9 |
| 37 |                 |                      |                                                                   |     |
| 38 |                 |                      | inferences from the data                                          |     |
| 39 |                 |                      |                                                                   |     |
| 40 |                 |                      |                                                                   |     |
| 41 | Analysis        | <a href="#">#11b</a> | Methods for understanding variation within the data,              | 8-9 |
| 42 |                 |                      |                                                                   |     |
| 43 |                 |                      | including the effects of time as a variable                       |     |
| 44 |                 |                      |                                                                   |     |
| 45 |                 |                      |                                                                   |     |
| 46 | Ethical         | <a href="#">#12</a>  | Ethical aspects of implementing and studying the                  | 7   |
| 47 |                 |                      |                                                                   |     |
| 48 | considerations  |                      | intervention(s) and how they were addressed, including, but       |     |
| 49 |                 |                      |                                                                   |     |
| 50 |                 |                      | not limited to, formal ethics review and potential conflict(s) of |     |
| 51 |                 |                      |                                                                   |     |
| 52 |                 |                      | interest                                                          |     |
| 53 |                 |                      |                                                                   |     |
| 54 |                 |                      |                                                                   |     |
| 55 |                 |                      |                                                                   |     |
| 56 | <b>Results</b>  |                      |                                                                   |     |
| 57 |                 |                      |                                                                   |     |
| 58 |                 |                      |                                                                   |     |
| 59 |                 |                      |                                                                   |     |
| 60 |                 |                      |                                                                   |     |



|    |                   |                      |                                                                 |           |
|----|-------------------|----------------------|-----------------------------------------------------------------|-----------|
| 1  |                   | <a href="#">#13a</a> | Initial steps of the intervention(s) and their evolution over   | 9, 17,18  |
| 2  |                   |                      | time (e.g., time-line diagram, flow chart, or table), including |           |
| 3  |                   |                      | modifications made to the intervention during the project       |           |
| 4  |                   |                      |                                                                 |           |
| 5  |                   |                      |                                                                 |           |
| 6  |                   |                      |                                                                 |           |
| 7  |                   |                      |                                                                 |           |
| 8  |                   |                      |                                                                 |           |
| 9  |                   | <a href="#">#13b</a> | Details of the process measures and outcome                     | 10, 11,19 |
| 10 |                   |                      |                                                                 |           |
| 11 |                   |                      |                                                                 |           |
| 12 |                   | <a href="#">#13c</a> | Contextual elements that interacted with the intervention(s)    |           |
| 13 |                   |                      |                                                                 |           |
| 14 |                   |                      |                                                                 |           |
| 15 |                   | <a href="#">#13d</a> | Observed associations between outcomes, interventions,          | 10,11,20- |
| 16 |                   |                      | and relevant contextual elements                                | ,23       |
| 17 |                   |                      |                                                                 |           |
| 18 |                   |                      |                                                                 |           |
| 19 |                   |                      |                                                                 |           |
| 20 |                   | <a href="#">#13e</a> | Unintended consequences such as unexpected benefits,            |           |
| 21 |                   |                      | problems, failures, or costs associated with the                |           |
| 22 |                   |                      | intervention(s).                                                |           |
| 23 |                   |                      |                                                                 |           |
| 24 |                   |                      |                                                                 |           |
| 25 |                   |                      |                                                                 |           |
| 26 |                   |                      |                                                                 |           |
| 27 |                   |                      |                                                                 |           |
| 28 |                   | <a href="#">#13f</a> | Details about missing data                                      | 9         |
| 29 |                   |                      |                                                                 |           |
| 30 |                   |                      |                                                                 |           |
| 31 | <b>Discussion</b> |                      |                                                                 |           |
| 32 |                   |                      |                                                                 |           |
| 33 |                   |                      |                                                                 |           |
| 34 | Summary           | <a href="#">#14a</a> | Key findings, including relevance to the rationale and specific | 12-14     |
| 35 |                   |                      | aims                                                            |           |
| 36 |                   |                      |                                                                 |           |
| 37 |                   |                      |                                                                 |           |
| 38 |                   |                      |                                                                 |           |
| 39 | Summary           | <a href="#">#14b</a> | Particular strengths of the project                             | 14        |
| 40 |                   |                      |                                                                 |           |
| 41 |                   |                      |                                                                 |           |
| 42 |                   |                      |                                                                 |           |
| 43 | Interpretation    | <a href="#">#15a</a> | Nature of the association between the intervention(s) and the   | 12,13     |
| 44 |                   |                      | outcomes                                                        |           |
| 45 |                   |                      |                                                                 |           |
| 46 |                   |                      |                                                                 |           |
| 47 |                   |                      |                                                                 |           |
| 48 | Interpretation    | <a href="#">#15b</a> | Comparison of results with findings from other publications     | 12        |
| 49 |                   |                      |                                                                 |           |
| 50 |                   |                      |                                                                 |           |
| 51 | Interpretation    | <a href="#">#15c</a> | Impact of the project on people and systems                     | 13,14     |
| 52 |                   |                      |                                                                 |           |
| 53 |                   |                      |                                                                 |           |
| 54 | Interpretation    | <a href="#">#15d</a> | Reasons for any differences between observed and                | 12        |
| 55 |                   |                      | anticipated outcomes, including the influence of context        |           |
| 56 |                   |                      |                                                                 |           |
| 57 |                   |                      |                                                                 |           |
| 58 |                   |                      |                                                                 |           |
| 59 |                   |                      |                                                                 |           |
| 60 |                   |                      |                                                                 |           |

|    |                    |                      |                                                               |       |
|----|--------------------|----------------------|---------------------------------------------------------------|-------|
| 1  | Interpretation     | <a href="#">#15e</a> | Costs and strategic trade-offs, including opportunity costs   |       |
| 2  |                    |                      |                                                               |       |
| 3  |                    |                      |                                                               |       |
| 4  | Limitations        | <a href="#">#16a</a> | Limits to the generalizability of the work                    | 14,15 |
| 5  |                    |                      |                                                               |       |
| 6  |                    |                      |                                                               |       |
| 7  | Limitations        | <a href="#">#16b</a> | Factors that might have limited internal validity such as     | 14,15 |
| 8  |                    |                      | confounding, bias, or imprecision in the design, methods,     |       |
| 9  |                    |                      | measurement, or analysis                                      |       |
| 10 |                    |                      |                                                               |       |
| 11 |                    |                      |                                                               |       |
| 12 |                    |                      |                                                               |       |
| 13 |                    |                      |                                                               |       |
| 14 |                    |                      |                                                               |       |
| 15 | Limitations        | <a href="#">#16c</a> | Efforts made to minimize and adjust for limitations           | 14,15 |
| 16 |                    |                      |                                                               |       |
| 17 |                    |                      |                                                               |       |
| 18 | Conclusion         | <a href="#">#17a</a> | Usefulness of the work                                        | 15    |
| 19 |                    |                      |                                                               |       |
| 20 |                    |                      |                                                               |       |
| 21 | Conclusion         | <a href="#">#17b</a> | Sustainability                                                | 15    |
| 22 |                    |                      |                                                               |       |
| 23 |                    |                      |                                                               |       |
| 24 | Conclusion         | <a href="#">#17c</a> | Potential for spread to other contexts                        | 15    |
| 25 |                    |                      |                                                               |       |
| 26 |                    |                      |                                                               |       |
| 27 | Conclusion         | <a href="#">#17d</a> | Implications for practice and for further study in the field  | 15    |
| 28 |                    |                      |                                                               |       |
| 29 |                    |                      |                                                               |       |
| 30 | Conclusion         | <a href="#">#17e</a> | Suggested next steps                                          | 15    |
| 31 |                    |                      |                                                               |       |
| 32 |                    |                      |                                                               |       |
| 33 |                    |                      |                                                               |       |
| 34 | <b>Other</b>       |                      |                                                               |       |
| 35 |                    |                      |                                                               |       |
| 36 | <b>information</b> |                      |                                                               |       |
| 37 |                    |                      |                                                               |       |
| 38 |                    |                      |                                                               |       |
| 39 | Funding            | <a href="#">#18</a>  | Sources of funding that supported this work. Role, if any, of | 5     |
| 40 |                    |                      | the funding organization in the design, implementation,       |       |
| 41 |                    |                      | interpretation, and reporting                                 |       |
| 42 |                    |                      |                                                               |       |
| 43 |                    |                      |                                                               |       |
| 44 |                    |                      |                                                               |       |
| 45 |                    |                      |                                                               |       |

None The SQUIRE 2.0 checklist is distributed under the terms of the Creative Commons Attribution License CC BY-NC 4.0. This checklist can be completed online using <https://www.goodreports.org/>, a tool made by the [EQUATOR Network](#) in collaboration with [Penelope.ai](#)

# BMJ Open

## The management of chronic headache with referral from primary care to direct access to Magnetic Resonance Imaging (MRI) compared to Neurology services: an observational prospective study in London.

|                                 |                                                                                                                                                                                                                                                                                                                                                                                                                                                                                                                                                                                                                                                                                                                                                                                                                                                                                                                                                                                                                                                                                                                       |
|---------------------------------|-----------------------------------------------------------------------------------------------------------------------------------------------------------------------------------------------------------------------------------------------------------------------------------------------------------------------------------------------------------------------------------------------------------------------------------------------------------------------------------------------------------------------------------------------------------------------------------------------------------------------------------------------------------------------------------------------------------------------------------------------------------------------------------------------------------------------------------------------------------------------------------------------------------------------------------------------------------------------------------------------------------------------------------------------------------------------------------------------------------------------|
| Journal:                        | <i>BMJ Open</i>                                                                                                                                                                                                                                                                                                                                                                                                                                                                                                                                                                                                                                                                                                                                                                                                                                                                                                                                                                                                                                                                                                       |
| Manuscript ID                   | bmjopen-2019-036097.R2                                                                                                                                                                                                                                                                                                                                                                                                                                                                                                                                                                                                                                                                                                                                                                                                                                                                                                                                                                                                                                                                                                |
| Article Type:                   | Original research                                                                                                                                                                                                                                                                                                                                                                                                                                                                                                                                                                                                                                                                                                                                                                                                                                                                                                                                                                                                                                                                                                     |
| Date Submitted by the Author:   | 22-Jun-2020                                                                                                                                                                                                                                                                                                                                                                                                                                                                                                                                                                                                                                                                                                                                                                                                                                                                                                                                                                                                                                                                                                           |
| Complete List of Authors:       | Rua, Tiago; King's College London, King's Health Economics; Guy's and Saint Thomas' NHS Foundation Trust, Clinical Imaging and Medical Physics<br>Mazumder, Asif; Guy's & St Thomas' Hospitals NHS Foundation Trust, Neuroradiology Group, Department of Radiology, Lambeth Wing<br>Akande, Yvonne; Guy's and Saint Thomas' NHS Foundation Trust, Clinical Imaging and Medical Physics<br>Margariti, Charikleia; King's College London<br>Ochulor, Juliana; Guy's and Saint Thomas' NHS Foundation Trust, Neurology Department<br>Turville, Joanna; Guy's and Saint Thomas' NHS Foundation Trust, Clinical Imaging and Medical Physics<br>Razavi, Reza; King's College London, Imaging Science Division<br>Peacock, Janet; King's College London, Division of Primary Care and Public Health Sciences<br>McCrone, Paul; King's College London,<br>Goh, Vicky; King's College London, School of Biomedical Engineering and Imaging Sciences<br>Shearer, James; King's College London, i. Primary Care and Public Health Sciences<br>Afridi, Shazia; Guy's and Saint Thomas' NHS Foundation Trust, Neurology Department |
| <b>Primary Subject Heading</b>: | Neurology                                                                                                                                                                                                                                                                                                                                                                                                                                                                                                                                                                                                                                                                                                                                                                                                                                                                                                                                                                                                                                                                                                             |
| Secondary Subject Heading:      | Diagnostics, Evidence based practice, General practice / Family practice, Health economics, Radiology and imaging                                                                                                                                                                                                                                                                                                                                                                                                                                                                                                                                                                                                                                                                                                                                                                                                                                                                                                                                                                                                     |
| Keywords:                       | Migraine < NEUROLOGY, RADIOLOGY & IMAGING, Head & neck imaging < RADIOLOGY & IMAGING, Magnetic resonance imaging < RADIOLOGY & IMAGING, HEALTH ECONOMICS                                                                                                                                                                                                                                                                                                                                                                                                                                                                                                                                                                                                                                                                                                                                                                                                                                                                                                                                                              |
|                                 |                                                                                                                                                                                                                                                                                                                                                                                                                                                                                                                                                                                                                                                                                                                                                                                                                                                                                                                                                                                                                                                                                                                       |

1  
2  
3  
4  
5  
6  
7  
8  
9  
10  
11  
12  
13  
14  
15  
16  
17  
18  
19  
20  
21  
22  
23  
24  
25  
26  
27  
28  
29  
30  
31  
32  
33  
34  
35  
36  
37  
38  
39  
40  
41  
42  
43  
44  
45  
46  
47  
48  
49  
50  
51  
52  
53  
54  
55  
56  
57  
58  
59  
60





I, the Submitting Author has the right to grant and does grant on behalf of all authors of the Work (as defined in the below author licence), an exclusive licence and/or a non-exclusive licence for contributions from authors who are: i) UK Crown employees; ii) where BMJ has agreed a CC-BY licence shall apply, and/or iii) in accordance with the terms applicable for US Federal Government officers or employees acting as part of their official duties; on a worldwide, perpetual, irrevocable, royalty-free basis to BMJ Publishing Group Ltd ("BMJ") its licensees and where the relevant Journal is co-owned by BMJ to the co-owners of the Journal, to publish the Work in this journal and any other BMJ products and to exploit all rights, as set out in our [licence](#).

The Submitting Author accepts and understands that any supply made under these terms is made by BMJ to the Submitting Author unless you are acting as an employee on behalf of your employer or a postgraduate student of an affiliated institution which is paying any applicable article publishing charge ("APC") for Open Access articles. Where the Submitting Author wishes to make the Work available on an Open Access basis (and intends to pay the relevant APC), the terms of reuse of such Open Access shall be governed by a Creative Commons licence – details of these licences and which [Creative Commons](#) licence will apply to this Work are set out in our licence referred to above.

Other than as permitted in any relevant BMJ Author's Self Archiving Policies, I confirm this Work has not been accepted for publication elsewhere, is not being considered for publication elsewhere and does not duplicate material already published. I confirm all authors consent to publication of this Work and authorise the granting of this licence.

1  
2  
3 **The management of chronic headache with referral from primary care to direct**  
4 **access to Magnetic Resonance Imaging (MRI) compared to Neurology services: an**  
5 **observational prospective study in London.**  
6  
7  
8  
9

10 Tiago Rua<sup>1,2</sup>, Asif A. Mazumder<sup>2</sup>, Yvonne Akande<sup>2</sup>, Charikleia Margariti<sup>2</sup>, Juliana Ochulor<sup>3</sup>, Joanna  
11 Turville<sup>2</sup>, Reza Razavi<sup>2,4</sup>, Janet L. Peacock<sup>5</sup>, Paul McCrone<sup>1</sup>, Vicky Goh<sup>2,6</sup>, James Shearer<sup>1</sup>, Shazia.K.  
12 Afridi<sup>3</sup>  
13  
14

15  
16  
17 <sup>1</sup> King's Health Economics, King's College London, London, UK  
18

19  
20 <sup>2</sup> Department of Clinical Imaging and Medical Physics, Guy's and St Thomas' NHS Foundation Trust,  
21 London, UK  
22

23  
24 <sup>3</sup> Department of Neurology, Guy's and St Thomas' NHS Foundation Trust, London, UK  
25

26  
27 <sup>4</sup> Vice President & Vice-Principal (Research), King's College London, London, UK  
28

29  
30 <sup>5</sup> School of Population Health and Environmental Sciences, King's College London, London, UK  
31

32  
33 <sup>6</sup> Cancer Imaging, School of Biomedical Engineering and Imaging Sciences, King's College London,  
34 London, UK  
35  
36  
37  
38

39 Tiago Rua, Health Technology Analyst, King's Health Economics, King's College London, London, UK;  
40 Clinical Imaging and Medical Physics Directorate, Guy's and St Thomas' NHS Foundation Trust, London,  
41 UK. E-mail: tiago.rua@kcl.ac.uk  
42

43  
44 Asif A. Mazumder, Consultant Neuroradiologist, Guy's and St Thomas NHS Trust, London, UK; Honorary  
45 Senior Clinical Lecturer, King's College London, London, UK. E-mail: asif.mazumder@gstt.nhs.uk  
46

47 Yvonne Akande, Project Manager, Guy's and St Thomas NHS Trust, London, UK. Email:  
48 yvonne.akande@kcl.ac.uk  
49

50 Charikleia Margariti, Research Assistant, School of Biomedical Engineering and Imaging Sciences, King's  
51 College London, London, UK. E-mail: charikleia.margariti@kcl.ac.uk  
52

53  
54 Juliana Ochulor, Clinical Nurse Specialist, Guy's and St Thomas NHS Trust, London, UK. E-mail:  
55 juliana.ochulor@gstt.nhs.uk  
56  
57

1  
2  
3 Joanna Turville, Project Director, Department of Clinical Imaging and Medical Physics, Guy's and St  
4 Thomas' NHS Foundation Trust, London, UK. E-mail: joanna.turville@gstt.nhs.uk

5  
6  
7 Reza Razavi, Vice President & Vice-Principal (Research), King's College London, London, UK. E-mail:  
8 reza.razavi@kcl.ac.uk

9  
10 Janet L. Peacock, Professor of Medical Statistics, School of Population Health and Environmental  
11 Sciences, King's College London, London, UK. E-mail: janet.peacock@kcl.ac.uk

12  
13  
14 Paul McCrone, Professor in Health Economics, King's Health Economics, King's College London, London,  
15 UK. E-mail: p.mccrone@greenwich.ac.uk

16  
17  
18 Vicky Goh, Professor of Clinical Cancer Imaging; Honorary Consultant Radiologist, Clinical Imaging and  
19 Medical Physics Directorate, Guy's and St Thomas' NHS Foundation Trust, London, UK; Cancer Imaging,  
20 School of Biomedical Engineering and Imaging Sciences, King's College London, London, UK. E-mail:  
21 vicky.goh@kcl.ac.uk

22  
23  
24 James Shearer, Lecturer in Health Economics, King's Health Economics, King's College London, London,  
25 UK. E-mail: james.shearer@kcl.ac.uk

26  
27  
28 Shazia K Afridi, Consultant Neurologist, Guy's and St Thomas' NHS Trust; Visiting Senior Lecturer, King's  
29 College London, London, UK. E-mail: shazia.afridi@gstt.nhs.uk

30  
31  
32  
33  
34  
35 **Corresponding author:** Tiago Rua, 5<sup>th</sup> floor Becket House, 1 Lambeth Palace Road, London SE1 7EU. E-  
36 mail: [tiago.rua@kcl.ac.uk](mailto:tiago.rua@kcl.ac.uk). Contact number: 020 7188 9529

37  
38  
39  
40  
41 **Acknowledgements:** The authors would like to thank all patients and staff members at Guy's and St  
42 Thomas' NHS Trust, particularly neurology and radiology consultants, for making this study possible.  
43  
44  
45  
46  
47  
48  
49  
50  
51  
52  
53  
54  
55  
56  
57  
58  
59  
60

## Abstract

**Objectives.** To evaluate the cost, accessibility and patient satisfaction implications of two clinical pathways used in the management of chronic headache.

**Intervention.** Management of chronic headache following referral from Primary Care that differed in the first appointment, either a Neurology appointment or an MRI brain scan.

**Design and setting.** A pragmatic, non-randomised, prospective, single-center study at a Central Hospital in London.

**Participants.** Adult patients with chronic headache referred from Primary to Secondary Care.

**Primary and secondary outcome measures.** Participants' use of health care services and costs were estimated using primary and secondary care databases and questionnaires quarterly up to 12 months post-recruitment. Cost analyses were compared using generalised linear models (GLM). Secondary outcomes assessed: access to care, patient satisfaction, headache burden and self-perceived quality of life using headache-specific (MIDAS, HIT-6) and a generic questionnaire (EQ-5D-5L).

**Results.** Mean (SD) cost up to 6 months post-recruitment per participant was £578 (£420) for the Neurology group (n=128) and £245 (£172) for the MRI group (n=95), leading to an estimated mean cost difference of £333 (95% CI £253 to £413,  $p<0.001$ ). The mean cost difference at 12 months increased to £518 (95% CI £401 to £637,  $p<0.001$ ). When adjusted for baseline and follow-up imbalances between groups, this remained statistically significant. The utilisation of brain MRI improved access to care compared to the Neurology group ( $p<0.001$ ). Participants in the Neurology group reported higher levels of satisfaction associated with the pathway and led to greater change in care management.

**Conclusion.** Direct referral to brain MRI from Primary Care led to cost-savings and quicker access to care but lower satisfaction levels when compared with referral to Neurology services. Further research into the use of brain MRI for a subset of patient population more likely to be reassured by a negative brain scan should be considered.

**Keywords:** Chronic headache; migraine; direct access; magnetic resonance imaging; cost analysis.

### Strengths and limitations of this study

- The estimate of health care resource use was based on comprehensive and complete data retrieved from hospital databases supplemented by both primary care utilisation data and self-reported participant data.



- 1
- 2
- 3
- 4
- 5
- 6
- 7
- 8
- 9
- 10
- 11
- 12
- 13
- 14
- 15
- 16
- 17
- 18
- 19
- 20
- 21
- 22
- 23
- 24
- 25
- 26
- 27
- 28
- 29
- 30
- 31
- 32
- 33
- 34
- 35
- 36
- 37
- 38
- 39
- 40
- 41
- 42
- 43
- 44
- 45
- 46
- 47
- 48
- 49
- 50
- 51
- 52
- 53
- 54
- 55
- 56
- 57
- 58
- 59
- 60
- The evaluation of the intervention's impact considered different dimensions of analysis (efficiency, quality of care, access to care and patient satisfaction).
- This was a single-centre study with participants recruited from one central hospital in London, therefore a multi-centre study would be necessary to explore the generalisability of the results.

For peer review only

## Introduction

Globally, the percentage of the adult population with an active headache disorder is 47% for episodic headache and 3% for chronic headache (lasting more than 15 days per month) [1]. Headache is in the top ten international causes of disability [2], with nearly half of sufferers reporting it affects work, home or social activities [3–5]. Most headaches are primary headache disorders, such as migraine or tension-type headaches. Secondary headaches, due to an underlying serious pathology (e.g. tumour, brain aneurysm) are far less common [6]. In fact, less than 0.1% of the lifetime headache prevalence is associated with a life-threatening condition, which can include primary or secondary brain tumours [2,3].

Most headache sufferers self-manage, but over 4% of adults each year consult their General Practitioner (GP) [7, 8]. GPs manage 97% of headache presentations, particularly GPs with special interest and training in headache training initiatives [9], with 2% of these referred to neurologists and 1% to other specialists [7]. Headache is the most common cause for GP referrals to neurologists accounting for up to 20–30% [10–13], the vast majority of these are for migraine. Chronic migraine sufferers (>15 days/month) had more emergency department/hospital visits, and diagnostic tests than those with episodic migraine and consequently the medical costs were three times higher [14]. Hence, despite the benign nature of most headaches, headache management is associated with high health care utilisation. Furthermore, a study in multiple countries of the European Union found that headache management was variable in terms of visits with GPs and specialists and medication use [15]. Between 2012 and 2014, patients presenting to headache specialists (either neurologists or GPs with special interest in headache) costed £956 million in the UK [13, 16].

GP direct access to imaging has been defined as a priority within the National Health Service (NHS), with direct access to brain Magnetic Resonance Imaging (MRI) for the diagnosis of brain cancer identified as a specific initiative [8]. GPs have reported referrals for secondary care, both for a neurologist consultation or neuroimaging, when they were unable to reassure the patient [17, 18]. Furthermore, Morgan et al. (2007) found that referral for headache is often the outcome of patient pressure and anxiety interacting with GP characteristics, organisational factors and service availability rather than the headache severity itself [17]. This contrasts with the recommendations from the National Institute for Health and Care Excellence (NICE) that does not recommend the use of neuroimaging for reassurance purposes [19]. A US study estimated that patients with new onset migraine headache or a flare-up of chronic headache had, respectively, a 39% (95% CI 24–54%) and 51% (95% CI 32–68%) probability of having neuroimaging routinely ordered even where guidelines specifically recommended against this approach [20]. A UK-based randomised controlled trial evaluated the cost implications of using brain MRI for reassurance purposes and found that it led to a decrease in health care costs, in particular for patients with higher levels of psychiatric morbidity [21].

In summary, despite proportionately low level of referrals to secondary care, high prevalence makes headache the most frequently listed reason for referral to neurologists and thus, utilises capacity that is

1  
2  
3 severely constrained. The potential decrease of referral rates to Neurology specialists as a result of direct  
4 access to imaging holds the potential release resources. On the other hand, direct access may be  
5 associated with a transfer of workload to Radiology, as not all patients directly referred to brain MRI would  
6 routinely undergo an MRI scan as part of the management of their chronic headache. This study aims to  
7 evaluate the health care utilisation and associated costs of GPs using direct access to brain MRI for the  
8 management of chronic headache patients compared to referral to a Neurologist.  
9  
10  
11

## 12 **Patients and Methods**

### 13 Study design and patient selection

14  
15  
16  
17 The study was an independent single-centre site, prospective, observational study. The study compared  
18 two existing clinical pathways in the management of patients with chronic headache from either GP referral  
19 to the Neurology Department or to direct access to brain MRI. No change to clinical practice was involved.  
20 Participants were allocated to two groups, the Neurology group or the MRI group. The allocation was  
21 decided *a priori*, i.e. the referrer (in this case the GP) decided which referral route would suit each  
22 participant. Subsequent care was consistent with standard of care for each clinical pathway and depicted  
23 in Figure 1.  
24  
25  
26  
27

28 Patients eligible for the study included adults aged 16 years or over with chronic migraine defined as  
29 occurring  $\geq 15$  days per month for more than 3 months (as per ICHD-3 criteria) and referred from GP  
30 practices to a local Hospital in Central London, either for a Neurology outpatient appointment or an MRI  
31 exam. Participants were excluded if there were secondary causes for the headache, if they were prisoners,  
32 lacked capacity to give consent or participate in the study, not fluent in English or already taking part in a  
33 clinical trial of an investigational medicinal product. Following eligibility assessment, participants completed  
34 a written informed consent. The Health Research Authority and Research Ethics Committee (West of  
35 Scotland – REC 4) approved the study research on 12<sup>th</sup> April 2016 (REC reference 16/WS/0028).  
36  
37  
38  
39

### 40 Patient and Public Involvement statement

41  
42  
43 This study has involved Patient and Public Involvement (PPI) during the design and dissemination phase.  
44 Prior to the start of the research, a group of patients suffering from chronic headache were consulted to  
45 produce the study mobile app that was used to monitor symptoms and triggers of chronic headache. The  
46 patients who were involved in the study design, as well as all study participants, received a lay summary of  
47 the research findings as per their preferences, either via post or e-mail. Research data are available upon  
48 reasonable request.  
49  
50

### 51 Study outcomes

52  
53  
54 The primary outcome was to estimate the 6-month health care costs associated with two existing clinical  
55 pathways in the management of chronic headaches. Secondary outcomes comprised: the extension of the  
56  
57

1  
2  
3 cost analysis up to 12 months, the evaluation of access to care, patient satisfaction, headache burden and  
4 time off work associated with both clinical pathways.  
5

#### 6 7 Service use costs 8

9 Total costs were calculated based on the multiplication of any headache-related healthcare events by the  
10 unit cost of each event. Resource use data included contacts with any NHS healthcare provider associated  
11 with the management of chronic headache. These included, among others, visits to GPs or headache  
12 clinical nurse specialist, inpatient care, neurologist or other headache-related outpatient visits (e.g.  
13 psychiatry), physiotherapist, visits to the Emergency Department (ED), advanced imaging such as  
14 Computed Tomography (CT) and MRI. Resource use data was retrieved from multiple hospital and primary  
15 care databases as well as self-reported data from participants using a participant headache diary (either  
16 paper-based or a headache mobile app). For the purposes of the primary outcome, the valuation of unit  
17 costs was, whenever possible, based on NHS Reference Costs 2016-17 [22]. Medication costs were  
18 derived from Prescription Cost Analysis [23] and estimated from clinical data, specifically secondary care  
19 clinic letters and information provided by primary care. Participants were also asked to record time off work  
20 due to headache using the weekly participant diary.  
21  
22  
23  
24  
25  
26  
27

#### 28 Quality of life and headache burden 29

30 Headache burden was assessed using validated headache questionnaires and headache diaries. The HIT-  
31 6 questionnaire measured the headache burden based on 6 questions, leading to a score range from 36 to  
32 78. The MIDAS questionnaire assessed the disability associated with the headache (ranges from 0 to 90).  
33 Furthermore, along with the headache diaries completed by participants, the MIDAS questionnaire allowed  
34 the estimate of the number of headache days per quarter (maximum of 90 days) and self-reported  
35 headache pain scores (ranging from 0, no pain at all, to 10, the worst pain ever).  
36  
37  
38  
39  
40

#### 41 Access to care 42

43 The time elapsed between the GP referral and the first appointment in each group, either the Neurology  
44 appointment or the MRI scan, was measured as a proxy for access to care. Furthermore, in the MRI group,  
45 the availability of the MRI report to the GP, rather than the actual timing of the diagnostic scan, was  
46 considered.  
47  
48  
49

#### 50 Change in care management 51

52 Change in care management in both groups was evaluated. It was considered that a change in care  
53 management occurred when patients underwent new treatment options (medication or otherwise, e.g. new  
54 headache medication, Botox treatment).  
55  
56  
57

### Patient satisfaction

Patient satisfaction was evaluated at month 3 post-recruitment using a non-validated questionnaire. This questionnaire evaluated three dimensions of analysis: (a) referral process (time elapsed between referral from primary care to initial secondary care appointment); (b) initial appointment; and (c) overall experience three months after recruitment.

### Statistical analyses

This study was observational but all analyses were based on the principle of 'intention-to-treat' so that participants recruited were included in the analysis as per the group they were recruited to, regardless of whether they actually received the intended treatment, any protocol deviations or potential losses to follow-up [24]. Given the study's time horizon of 12 months, no discounting of costs or effects were considered. Descriptive statistics on several socio-demographics baseline characteristics were included. Differences in baseline characteristics between treatment groups were compared using statistical tests: Chi-squared for categorical data, t test for Normal data and Mann-Whitney for non-Normal quantitative data. Given the skewness associated with the cost distribution, all cost differences between groups were assessed using generalised linear models (GLM) with an identity-link and gamma distribution. An identity link function instead of a log link was considered in order to avoid potential analytical biases [25, 26]. An unadjusted GLM cost analysis with the study group (MRI group vs Neurology group) as only univariate analysis was performed as the first step. Given the study's observational design, the cost difference can be impacted due to the lack of randomisation [27]. Baseline variables that differed between the two groups ( $p < 0.1$ ) were included in the multivariable (adjusted) GLM analyses. For all GLM analyses, group difference estimates and associated confidence intervals were reported, together with p-values. Analyses were conducted using Stata version 15.

### Sample size

The sample size estimate was calculated based on the primary endpoint, total 6-month health care costs. A total of 150 participants were recruited in the Neurology group and 99 participants in the MRI group to achieve a detection a cost difference of £300 assuming standard deviations of £750 and £500, respectively, with 85% power at the 5% two-sided significance level. A 20% increase in sample size due to unknown cost distribution and attrition rate was considered.

## **Results**

A total of 249 participants were recruited, 150 in the Neurology group and 99 in the MRI group. 100% ( $n=128$ ) and 97% ( $n=96$ ) of participants recruited received the treatment allocation in the Neurology and the MRI group, respectively (Figure 2). With regards to the follow-up duration, 15% ( $n=22$ ) and 4.0% ( $n=4$ )

1  
2  
3 participants withdrew from the Neurology and MRI group, respectively, and were considered lost to follow-  
4 up. Remaining participants (n=223) were included in the analysis, equivalent to 128 (85%) and 95 (96%)  
5 participants in the Neurology and MRI group, respectively.  
6  
7

8 Baseline socio-demographic, clinical variables and resource use in the twelve months pre-recruitment are  
9 detailed in Table 1. A higher proportion of females were recruited to the Neurology group compared to the  
10 MRI group (81% vs 68%, p=0.039). Both groups were similar in mean age, ethnic mix, with more than half  
11 being White. No significant differences between the groups were found in terms of highest qualification and  
12 employment, with high-school and full-time employment being the most common. In terms of clinical  
13 variables, no significant difference between groups were found in terms of number of active health problems  
14 or number of headache triggers. Participants in the Neurology group reported lower utility and health scores  
15 using the generic EQ-5D-5L questionnaire, with a statistically significant difference in health scores  
16 (p=0.005). Lower health scores imply lower self-rated quality of life, while for the headache-specific  
17 questionnaires [Headache Impact Test (HIT-6) and Migraine Disability Assessment (MIDAS)], a higher  
18 score implies a higher headache burden. Compared to the MRI group, participants in the Neurology group  
19 reported significantly higher headache burden (HIT-6 mean score: 65 vs 63, p=0.006), number of headache  
20 days in the past 3 months (MIDAS questionnaire: 52 vs 43, p=0.038). Participants in the Neurology group  
21 also had significantly more primary care appointments (3.7 vs 2.4, p<0.001) and all NHS appointments (4.3  
22 vs 2.5, p<0.001).  
23  
24  
25  
26  
27  
28  
29  
30

### 31 Service use

32  
33 Table 2 summarises the NHS resource use of primary care and hospital-based services over a period of  
34 12 months following recruitment. With regards to primary care utilisation, participants in the Neurology  
35 group had a significantly higher number of GP face-to-face appointments (mean number per participant:  
36 1.82 vs 1.19, p=0.006). Regarding secondary care, participants in the Neurology group had a higher mean  
37 number of outpatient appointments (2.52 vs 0.26, p<0.001) and other treatments such as Botox and nerve  
38 root injection (mean 0.30 vs 0.05, p<0.001). In contrast, they had a lower mean number of brain MRIs (0.59  
39 vs 1.05, p<0.001). There were no statistically significant differences in the utilisation levels of any of the  
40 other healthcare events.  
41  
42  
43  
44

45  
46 The NHS resource use pre and post-recruitment for both groups was also compared. Table 3 summarises  
47 the difference between headache-related events 12 months post-recruitment compared to the 12 months  
48 pre-recruitment. A reduction of 197 and 87 GP visits (mean 1.54/0.92 per participant or a percentage  
49 reduction of 85%/77%) was noted in the Neurology and MRI group, respectively. Similarly, there was a  
50 reduction in emergency department utilisation with a decrease of 23 and 6 episodes (mean 0.18 and 0.07  
51 per participant or a percentage reduction of 288% and 120%) in the Neurology and MRI group, respectively.  
52  
53  
54

### 55 Cost analyses

1  
2  
3 The mean (SD) cost management per participant at 6 months post-recruitment was lower in the MRI group  
4 compared to the Neurology group [£245 (£172) vs £578 (£420)], leading to a mean cost difference between  
5 groups of -£333 per participant (95% CI: -£413 to -£253,  $p<0.001$ ). The MRI group had a higher proportion  
6 of participants with lower costs (£0 to £250 range) than the Neurology group (73% vs 4.7%). The initial cost  
7 analysis was extended to 12 months post-recruitment and the mean cost difference between groups  
8 increased, with the MRI group generating cost savings of £518 per participant (95% CI: -£637 to -£401,  
9  $p<0.001$ ).

10  
11  
12  
13  
14  
15 Given the non-randomised study design, an additional GLM analysis was performed to adjust for baseline  
16 characteristics. The unadjusted 6-month cost difference between groups (-£333; 95% CI: -£413, -£253)  
17 hardly changed after adjustment (-£308; 95% CI: -£408, -£209). In all analyses, at both 6 and 12 months  
18 post-recruitment, direct access to MRI for the management of chronic headache was associated with  
19 statistically significant mean cost savings for the NHS.  
20  
21

### 22 23 Abnormal findings in the MRI group

24  
25 Out of the 95 participants recruited in the MRI group, three MRIs were not performed during the initial  
26 appointment due to claustrophobia events. From a total number of 92 MRIs, 85 (92%) were normal and 7  
27 (7.6%) presented abnormal findings (Table 4), with one diagnosis being particularly significant (two small  
28 intracranial aneurysms). This participant was referred to neurovascular team for assessment, at which point  
29 no intervention was performed during the follow-up period (participant included in an active surveillance  
30 group). Two other participants had a change in their clinical management for less significant findings,  
31 leading to either a follow-up appointment or scan. No brain malignancies were diagnosed.  
32  
33

### 34 35 Access to care

36  
37 The mean time (SD) elapsed from GP referral to the initial Neurology and MRI scan was, respectively, 110  
38 (35) days and 39 days (17), a statistically significant difference ( $p<0.001$ ). Second, if the MRI report, than  
39 the actual scan, is considered as a proxy for access to care, the mean time elapsed was 70 days (35)  
40 ( $p<0.001$ ).  
41  
42

### 43 44 Change in management

45  
46 Participants in the Neurology group were more likely to have a change in therapeutic management  
47 compared to participants in the MRI group (97% vs 64%,  $p<0.001$ ). Similarly, among participants that had  
48 not started on preventative medication pre-recruitment, a higher proportion of participants in the Neurology  
49 group were started on preventative medication as part of their clinical management (93% vs 53%,  $p<0.001$ ).  
50  
51

### 52 53 Quality of life and headache burden

1  
2  
3 At baseline, mean utility was lower in the Neurology group but not significant (mean utility of 0.809 vs 0.830,  
4  $p=0.097$ ), while their self-perceived mean health score was significantly lower (EQ-5D-5L: visual analogue  
5 scale score of 64.0 vs 70.8,  $p=0.005$ ) (Table 5). There was no statistically significant differences between  
6 the groups at 6 months for to the utility and self-reported healthcare scores.  
7  
8

9  
10 At baseline, participants in the Neurology group presented a higher headache burden compared to the MRI  
11 group (mean score of 65.0 vs 62.6,  $p=0.006$ ) (Table 5). This trend seemed to be maintained over the follow-  
12 up period but was difficult to interpret due to high attrition rates: mean HIT-6 score at 6 months (60.0 vs  
13 53.1,  $p=0.968$ ). At baseline, participants in the Neurology group had higher headache severity compared  
14 to the MRI group, but this was not significant (mean MIDAS score of 57.8 vs 44.8,  $p=0.075$ ) (Table 5). In  
15 both groups the headache severity decreased over the follow-up period. At baseline, participants in the  
16 Neurology group reported a significantly higher mean number of headache days compared to the MRI  
17 group (51.6 vs 42.8,  $p=0.038$ ). This trend was observed at month 6 but was not significant (41.2 vs 26.5,  
18  $p=0.152$ ). A third variable assessed self-reported headache pain scores. At baseline, participants at  
19 baseline showed almost identical mean headache pain scores (6.9 vs 6.9,  $p=0.827$ ). During the follow-up  
20 period, no statistical differences were found at month 6 (4.5 vs 4.2,  $p=0.663$ ).  
21  
22  
23  
24  
25  
26  
27

### 28 Time off work

29  
30 Participants in the Neurology group ( $n=83$ ) had higher mean number of days off work due to headache  
31 compared to participants in the MRI group ( $n=35$ ) but these were not statistically significant at 6 (13.9 vs  
32 9.7,  $p=0.563$ ) or 12 months (27.9 vs 19.1,  $p=0.808$ ) post-recruitment.  
33  
34  
35

### 36 Patient satisfaction

37  
38 Patient satisfaction was evaluated at month 3 post-recruitment using a non-validated questionnaire  
39 (Appendix I). Participants in both groups reported no difference in terms of receiving an appointment in a  
40 suitable timeframe ( $p=0.193$ ). Participants in the MRI group reported higher satisfaction levels ( $p=0.005$ )  
41 compared to the Neurology group associated with the information received prior to the actual appointment.  
42 No statistically significant difference ( $p=0.366$ ) between the groups was found regarding the satisfaction  
43 levels of both appointments (either MRI scan or Neurologist appointment) but a higher proportion of  
44 participants in the Neurology group reported a better experience compared to their expectation ( $p=0.002$ ).  
45 At month 3 post-recruitment in all variables, except frequency of appointments ( $p=0.166$ ), participants in  
46 the Neurology group reported higher levels of satisfaction with: amount of time spent with clinical staff  
47 ( $p=0.001$ ); consistency of care ( $p=0.028$ ); how informed you felt about your condition ( $p=0.010$ ) / your  
48 treatment ( $p=0.004$ ); and the overall experience ( $p<0.001$ ).  
49  
50  
51  
52  
53  
54  
55

## 56 **Discussion**



1  
2  
3 Previous UK studies assessed the use of direct access to advanced imaging in the management of chronic  
4 headache patients [10, 21]. Howard et al. (2005) performed a randomised controlled trial, which showed  
5 that the use of imaging in patients led to a reduction of referral rates to Neurology services in secondary  
6 care from 23% to 1.3% (1/76) in the treatment group (i.e. patients being scanned) [21]. Thomas et al. (2010)  
7 estimated that direct access to brain imaging, in this case CT, reduced referral rates to Neurology in 86%  
8 of the cases during the follow-up period (average of 1.3 years per patient) [10].  
9  
10  
11  
12

13 The study's underlying hypothesis was that the early use of an advanced and accurate diagnostic tool (in  
14 this case MRI) would reassure both patients and GPs that no serious underlying cause (particularly brain  
15 tumour) is present. This would in turn reduce the headache burden and NHS resource use associated with  
16 the patient's subsequent management. Given the high prevalence of headache and the increased referral  
17 of patients with chronic headaches and other neurological conditions from primary care to hospital based  
18 care [7], it is relevant to assess the implications of using different management strategies. To our  
19 knowledge, no previous prospective study in the UK has assessed the economic implications of these two  
20 coexisting management strategies based on GP referral decision.  
21  
22  
23  
24  
25

26 The primary outcome was total costs at six months post-recruitment. The study showed that the use of  
27 advanced imaging produced cost-savings to the NHS compared to referral to Neurology, with mean cost-  
28 savings per participant of £333 and £518 at month 6 and 12 post-recruitment, respectively ( $p < 0.001$ ). These  
29 cost differences were multifactorial but primarily driven by: (i) the lower unit cost of a brain MRI scan (£146)  
30 compared to the initial Neurology appointment (£240); (ii) the lower number of outpatient appointments in  
31 the MRI group (25 vs 322); (iii) the fact that 75/128 (59%) of participants in the Neurology group ended up  
32 having a brain MRI scan in the 12-month period of follow-up; and (iv) the increased likelihood of patients in  
33 the Neurology arm receiving management with Botox injections or nerve block procedures (39 vs 5 events).  
34 Direct access to brain MRI seemed to reassure most participants as only 17 (18%) participants in the MRI  
35 group ended up being referred to a neurologist. Furthermore over 66% of participants in the MRI group had  
36 no further hospital-based care, compared to 5% in the Neurology group. Similarly, at primary care level,  
37 participants in the MRI group presented lower utilisation rates per participant when compared to the  
38 Neurology group (mean GP appointments of 1.82 vs 1.19,  $p = 0.006$ ). In order to mitigate the potential  
39 confounding by indication introduced by GPs referring patients to both clinical pathways, adjusted GLMs  
40 were conducted. All cost differences between groups remained statistically significant ( $p < 0.001$ ) when  
41 adjusted for differences in baseline characteristics or follow-up attrition rates.  
42  
43  
44  
45  
46  
47  
48  
49

50 At baseline, participants in the Neurology group presented lower self-reported quality of life and higher  
51 headache burden. HIT-6 scores did improve over time but we were unable to assess whether there was a  
52 statistically significant difference in both groups due to the high attrition rates, particularly in the MRI group.  
53 As mentioned, out of the 95 participants recruited to the MRI group, 17 (18%) were subsequently referred  
54 to a Neurologist. Interestingly, at baseline, these 17 patients reported higher headache burden compared  
55  
56  
57  
58  
59  
60

1  
2  
3 to all 95 patients recruited to the MRI group (MIDAS score: 51.2 vs 44.8; MIDAS headache days: 55.8 vs  
4 42.8). This finding seems to suggest that this data might be useful to risk stratify patients and support GPs  
5 in their referral criteria. However, further research into this area is required.  
6  
7

8 Participants in the Neurology group presented a higher probability of being started on a preventative  
9 medication and had a change in therapeutic management following referral from primary care. A small  
10 proportion (7.6%) of participants in the MRI group had abnormal findings in the initial brain MRI. Only one  
11 participant had clinically significant lesions (two small aneurysms) which were also incidental and no brain  
12 tumour was diagnosed.  
13  
14  
15

16 Time off work was also evaluated as a proxy of headache burden. Participants in the Neurology group  
17 presented a trend ( $p>0.05$ ) of higher number of days off work due to headache compared to participants in  
18 the MRI group. This difference was not however statistically significant.  
19  
20

21 Lastly, patient satisfaction in both groups was compared based on three dimensions of analysis: during the  
22 referral period, the initial appointment and overall satisfaction. Twenty five percent of participants in the  
23 Neurology group (vs 18% in the MRI group) reported dissatisfaction with the waiting time. This finding is  
24 not unexpected as the mean waiting time associated with the Neurology appointment was almost three  
25 times of the one associated with the MRI scan (110 vs 39 days). Contrary to the referral period, participants  
26 in the Neurology group reported trends of higher satisfaction levels associated with the first appointment  
27 (neurology outpatient visit vs MRI scan) and a better experience compared to their expectations (60% vs  
28 29% in the Neurology and MRI group, respectively). Participants in the Neurology group reported improved  
29 satisfaction levels at 3 months across different variables (time spent with clinician, consistency of care,  
30 information about the condition and its treatment). Almost three quarters of Neurology participants reported  
31 being satisfied or very satisfied with their headache management compared to only 21% in the MRI group  
32 ( $p<.001$ ). Both participants and GP referrers in the MRI group reported dissatisfaction associated with the  
33 waiting time elapsed between the MRI scan and the availability of results (mean time of 31 days). This  
34 might have contributed to increased anxiety in some participants.  
35  
36  
37  
38  
39  
40  
41  
42

#### 43 *Strengths of this study:* 44

45 The estimate of NHS resource use data was primarily based on comprehensive and complete data retrieved  
46 from hospital-based databases that captured both the acute and elective elements of the pathway  
47 associated with the management of patients with chronic headache. This data was supplemented by both  
48 primary care utilisation data, collected from each participant's GP, and self-reported participant data. The  
49 aim was to guarantee that any chronic headache related NHS event was costed regardless of the  
50 healthcare provider and its location. The prospective collection of health care utilisation and the evaluation  
51 of the impact of the interventions across different dimensions of analysis (efficiency, quality of care, access  
52 to care and patient satisfaction) were other key factors that contributed to the overall strength of the study.  
53  
54  
55  
56  
57

### Limitations of this study:

There were some limitations to this study. First, this was a single-centre study with participants recruited from one central hospital in London. A multi-centre study would be necessary to explore the generalisability of the results. Second, as with any observational study, no randomisation between groups was performed and there were significant differences in baseline of headache burden and health-scores and utilisation of resources. In order to mitigate potential confounding factors, adjusted multivariate analyses showed that the primary outcome was hardly affected and remained statistically significant. Nevertheless, residual confounding factors remain a limitation of the study. Third, specific inclusion and exclusion criteria were considered and as such the study sample might not be representative of all patients with chronic headache. Fourth, for the purpose of secondary outcomes, most data was self-reported and hence prone to recall bias. Lastly, there were high follow-up attrition rates particularly for participants in the MRI group, which affected some of the study's secondary outcomes.

### **Conclusions**

This study found that the referral from primary care to direct access to brain MRI compared to referral for a neurologist for patients with chronic headache was associated with lower NHS overall costs at 6 and 12 months post-recruitment. Despite waiting longer from referral to appointment, participants in the Neurology group reported higher satisfaction levels associated with the care received compared to the MRI group and were more likely to benefit from changes to their therapeutic management.

### Implications for further research and clinical practice

Baseline measures of headache burden, such as the HIT-6 or MIDAS, could potentially be used to determine which pathway may be suitable for patients but further research into the risk stratification of chronic headache patients is required. Future study designs should consider the confounding by indication introduced by recruiting participants referred to the two pathways based on GP decision. With regards to clinical practice, and based on the study findings, we plan to provide GPs with headache management advice along with the MRI report.

1  
2  
3 **Author contributions:**  
4

5 **Conception and design:** T. Rua, A. A. Mazumder, Y. Akande, J. Turville, R. Razavi, JL. Peacock, P.  
6 McCrone, S. K. Afridi  
7

8 **Acquisition of data:** T. Rua, Y. Akande, C. Margariti, J Ochulor  
9  
10

11 **Analysis and interpretation of data:** T. Rua, JL. Peacock, P. McCrone, J. Shearer  
12

13 **Drafting the manuscript:** T. Rua, A. A. Mazumder, JL. Peacock, P. McCrone, V. Goh, J. Shearer, S. K.  
14 Afridi  
15

16 **Final approval of the completed manuscript:** T. Rua, A. A. Mazumder, Y. Akande, C. Margariti, J.  
17 Turville, R. Razavi, JL. Peacock, P. McCrone, V. Goh, J. Shearer, S. K. Afridi  
18  
19  
20  
21  
22  
23

24 **Competing interests:** The authors declare no conflict of interests.  
25  
26  
27  
28  
29

30 **Funding:** This work was supported by the Guy's and St Thomas' Charity.  
31  
32  
33

34 **Data sharing statement:** Extra data can be accessed via the Dryad data repository at <http://datadryad.org/>  
35 with the doi: 10.5061/dryad.d7wm37pzn  
36  
37  
38  
39  
40  
41  
42  
43  
44  
45  
46  
47  
48  
49  
50  
51  
52  
53  
54  
55  
56  
57  
58  
59  
60

## References

- [1] R. Jensen and L. J. Stovner, "Epidemiology and comorbidity of headache," *Lancet Neurol.*, vol. 7, no. 4, pp. 354–361, Apr. 2008, doi: 10.1016/S1474-4422(08)70062-0.
- [2] L. Stovner *et al.*, "The global burden of headache: a documentation of headache prevalence and disability worldwide," *Cephalalgia Int. J. Headache*, vol. 27, no. 3, pp. 193–210, Mar. 2007, doi: 10.1111/j.1468-2982.2007.01288.x.
- [3] H. F. Boardman, E. Thomas, P. R. Croft, and D. S. Millson, "Epidemiology of headache in an English district," *Cephalalgia Int. J. Headache*, vol. 23, no. 2, pp. 129–137, Mar. 2003, doi: 10.1046/j.1468-2982.2003.00468.x.
- [4] T. Vos *et al.*, "Years lived with disability (YLDs) for 1160 sequelae of 289 diseases and injuries 1990–2010: a systematic analysis for the Global Burden of Disease Study 2010," *The Lancet*, vol. 380, no. 9859, pp. 2163–2196, Dec. 2012, doi: 10.1016/S0140-6736(12)61729-2.
- [5] M. Leonardi and A. Raggi, "Burden of migraine: international perspectives," *Neurol. Sci. Off. J. Ital. Neurol. Soc. Ital. Soc. Clin. Neurophysiol.*, vol. 34 Suppl 1, pp. S117-118, May 2013, doi: 10.1007/s10072-013-1387-8.
- [6] B. K. Rasmussen, R. Jensen, M. Schroll, and J. Olesen, "Epidemiology of headache in a general population--a prevalence study," *J. Clin. Epidemiol.*, vol. 44, no. 11, pp. 1147–1157, 1991.
- [7] R. Latinovic, M. Gulliford, and L. Ridsdale, "Headache and migraine in primary care: consultation, prescription, and referral rates in a large population," *J. Neurol. Neurosurg. Psychiatry*, vol. 77, no. 3, pp. 385–387, Mar. 2006, doi: 10.1136/jnnp.2005.073221.
- [8] Department of Health, "Direct Access to Diagnostic Tests for Cancer: Best Practice Referral Pathways for General Practitioners." 2012.
- [9] M. Braschinsky *et al.*, "Structured education can improve primary-care management of headache: the first empirical evidence, from a controlled interventional study," *J. Headache Pain*, vol. 17, p. 24, 2016, doi: 10.1186/s10194-016-0613-1.
- [10] R. Thomas, A. Cook, G. Main, T. Taylor, E. G. Caruana, and R. Swingler, "Primary care access to computed tomography for chronic headache," *Br. J. Gen. Pract.*, vol. 60, no. 575, pp. 426–430, Jun. 2010, doi: 10.3399/bjgp10X502146.
- [11] V. H. Patterson and T. F. Esmonde, "Comparison of the handling of neurological outpatient referrals by general physicians and a neurologist," *J. Neurol. Neurosurg. Psychiatry*, vol. 56, no. 7, p. 830, Jul. 1993.
- [12] L. Ridsdale, J. Doherty, P. McCrone, and P. Seed, "A new GP with special interest headache service: observational study," *Br. J. Gen. Pract.*, vol. 58, no. 552, pp. 478–483, Jul. 2008, doi: 10.3399/bjgp08X319440.
- [13] B. Osumili, P. McCrone, S. Cousins, and L. Ridsdale, "The Economic Cost of Patients With Migraine Headache Referred to Specialist Clinics," *Headache J. Head Face Pain*, vol. 58, no. 2, pp. 287–294, Feb. 2018, doi: 10.1111/head.13210.
- [14] L. M. Bloudek *et al.*, "Cost of healthcare for patients with migraine in five European countries: results from the International Burden of Migraine Study (IBMS)," *J. Headache Pain*, vol. 13, no. 5, pp. 361–378, Jul. 2012, doi: 10.1007/s10194-012-0460-7.
- [15] Z. Katsarava, M. Mania, C. Lampl, J. Herberhold, and T. J. Steiner, "Poor medical care for people with migraine in Europe - evidence from the Eurolight study," *J. Headache Pain*, vol. 19, no. 1, p. 10, Feb. 2018, doi: 10.1186/s10194-018-0839-1.
- [16] P. McCrone *et al.*, "Service use and costs for people with headache: a UK primary care study," *J. Headache Pain*, vol. 12, no. 6, pp. 617–623, Dec. 2011, doi: 10.1007/s10194-011-0362-0.
- [17] M. Morgan, L. Jenkins, and L. Ridsdale, "Patient pressure for referral for headache: a qualitative study of GPs' referral behaviour," *Br. J. Gen. Pract. J. R. Coll. Gen. Pract.*, vol. 57, no. 534, pp. 29–35, Jan. 2007.
- [18] R. Underwood, R. Kilner, and L. Ridsdale, "Primary care management of headaches and how direct-access MRI fits: a qualitative study of UK general practitioners' views," *BMJ Open*, vol. 7, no. 11, p. e018169, Nov. 2017, doi: 10.1136/bmjopen-2017-018169.
- [19] NICE, "Management of headaches," 2018. [Online]. Available: <https://pathways.nice.org.uk/pathways/headaches>. [Accessed: 28-Jan-2019].

- 1  
2  
3 [20] B. C. Callaghan, K. A. Kerber, R. J. Pace, L. Skolarus, W. Cooper, and J. F. Burke, "Headache  
4 neuroimaging: Routine testing when guidelines recommend against them," *Cephalalgia*, vol. 35, no.  
5 13, pp. 1144–1152, Nov. 2015, doi: 10.1177/0333102415572918.
- 6 [21] L. Howard *et al.*, "Are investigations anxiolytic or anxiogenic? A randomised controlled trial of  
7 neuroimaging to provide reassurance in chronic daily headache," *J. Neurol. Neurosurg. Psychiatry*,  
8 vol. 76, no. 11, pp. 1558–1564, Nov. 2005, doi: 10.1136/jnnp.2004.057851.
- 9 [22] NHS Improvement, "Reference costs | NHS Improvement," 2017. [Online]. Available:  
10 <https://improvement.nhs.uk/resources/reference-costs/#rc1718>. [Accessed: 31-Jul-2019].
- 11 [23] NHS Business Services Authority, "Prescription Cost Analysis (PCA) data | NHSBSA," 2018.  
12 [Online]. Available: [https://www.nhsbsa.nhs.uk/prescription-data/dispensing-data/prescription-cost-](https://www.nhsbsa.nhs.uk/prescription-data/dispensing-data/prescription-cost-analysis-pca-data)  
13 [analysis-pca-data](https://www.nhsbsa.nhs.uk/prescription-data/dispensing-data/prescription-cost-analysis-pca-data). [Accessed: 31-Jul-2019].
- 14 [24] S. K. Gupta, "Intention-to-treat concept: A review," *Perspect. Clin. Res.*, vol. 2, no. 3, pp. 109–112,  
15 2011, doi: 10.4103/2229-3485.83221.
- 16 [25] L. A. Polgreen and J. M. Brooks, "Estimating Incremental Costs with Skew: A Cautionary Note,"  
17 *Appl. Health Econ. Health Policy.*, vol. 10, no. 5, pp. 319–329, Sep. 2012, doi: 10.2165/11632430-  
18 000000000-00000.
- 19 [26] J. A. Barber and S. G. Thompson, "Analysis of cost data in randomized trials: an application of the  
20 non-parametric bootstrap," *Stat. Med.*, vol. 19, no. 23, pp. 3219–3236, 2000, doi: 10.1002/1097-  
21 0258(20001215)19:23<3219::AID-SIM623>3.0.CO;2-P.
- 22 [27] J. L. Moran, P. J. Solomon, A. R. Peisach, and J. Martin, "New models for old questions:  
23 generalized linear models for cost prediction," *J. Eval. Clin. Pract.*, vol. 13, no. 3, pp. 381–389, Jun.  
24 2007, doi: 10.1111/j.1365-2753.2006.00711.x.
- 25  
26  
27  
28  
29  
30  
31  
32  
33  
34  
35  
36  
37  
38  
39  
40  
41  
42  
43  
44  
45  
46  
47  
48  
49  
50  
51  
52  
53  
54  
55  
56  
57  
58  
59  
60

1  
2  
3  
4 Figure 1. High-level illustration of two existing clinical pathways associated with the referral from GP due  
5 to chronic headache.  
6  
7  
8  
9

10 Figure 2. Participant flow chart for the headache study.  
11  
12  
13  
14  
15  
16  
17  
18  
19  
20  
21  
22  
23  
24  
25  
26  
27  
28  
29  
30  
31  
32  
33  
34  
35  
36  
37  
38  
39  
40  
41  
42  
43  
44  
45  
46  
47  
48  
49  
50  
51  
52  
53  
54  
55  
56  
57  
58  
59  
60

For peer review only

Table 1. Baseline characteristics of the population analysed.

| Variable                                             | Neurology group (n=128) | MRI group (n=95) | p-value |
|------------------------------------------------------|-------------------------|------------------|---------|
| Age, years: mean (SD)                                | 38.4 (14.1)             | 40.0 (14.6)      | 0.514   |
| Gender Female, n (%)                                 | 103 (81)                | 65 (68)          | 0.039   |
| Ethnicity                                            |                         |                  | 0.079   |
| Asian                                                | 13 (10)                 | 6 (6.3)          |         |
| Black                                                | 40 (31)                 | 17 (18)          |         |
| White                                                | 68 (53)                 | 60 (63)          |         |
| Mixed                                                | 5 (3.9)                 | 8 (8.4)          |         |
| Other                                                | 2 (1.6)                 | 4 (4.2)          |         |
| Qualification, n (%)                                 |                         |                  | 0.565   |
| Advanced work or PhD                                 | 3 (2.3)                 | 4 (4.2)          |         |
| Master's Degree                                      | 15 (12)                 | 12 (13)          |         |
| Bachelor's Degree                                    | 31 (24)                 | 29 (31)          |         |
| High School                                          | 57 (45)                 | 33 (35)          |         |
| Did not finish High School                           | 8 (6.3)                 | 10 (11)          |         |
| Prefer not to answer                                 | 14 (11)                 | 7 (7.4)          |         |
| Employment, n (%)                                    |                         |                  | 0.839   |
| Employee in full time job (30 hours or more a week)  | 50 (39)                 | 36 (38)          |         |
| Employee in part-time job (under 30 hours a week)    | 18 (14)                 | 18 (19)          |         |
| Self-employed, full or part time                     | 12 (9.4)                | 8 (8.4)          |         |
| Full-time education at school, college or university | 16 (13)                 | 9 (9.5)          |         |
| Doing something else                                 | 2 (1.6)                 | 2 (2.1)          |         |
| Permanently sick/ disabled                           | 8 (6.3)                 | 6 (6.3)          |         |
| Looking after the home                               | 4 (3.1)                 | 6 (6.3)          |         |
| Unemployed and available for work                    | 12 (9.4)                | 6 (6.3)          |         |
| Wholly retired from work                             | 4 (3.1)                 | 4 (4.2)          |         |
| Prefer not to answer                                 | 2 (1.6)                 | 0 (0)            |         |
| Presence of mental health condition, n (%)           | 22 (17)                 | 11 (12)          | 0.243   |
| Number of active health problems: mean (SD)          | 2.0 (1.5)               | 1.8 (1.4)        | 0.277   |
| Number of headache triggers: mean (SD)               | 2.1 (1.8)               | 1.8 (1.4)        | 0.378   |
| Self-reported questionnaires                         |                         |                  |         |
| EQ-5D-5L: mean utility (SD)                          | 0.809 (0.182)           | 0.830 (0.195)    | 0.097   |
| EQ-5D-5L: mean score (SD)                            | 64 (19)                 | 71 (20)          | 0.005   |
| HIT-6: mean score (SD)                               | 65 (5.3)                | 63 (7.3)         | 0.006   |
| MIDAS, mean score (SD)                               | 58 (54)                 | 45 (45)          | 0.075   |
| MIDAS, mean headache days (SD)                       | 52 (32)                 | 43 (31)          | 0.038   |
| MIDAS, mean pain score (SD)                          | 6.9 (1.8)               | 6.9 (1.9)        | 0.778   |
| Resource use in the 12 months prior to recruitment   |                         |                  |         |
| GP appointments: mean (SD)                           | 3.7 (2.9)               | 2.4 (1.5)        | <0.001  |
| All NHS events: mean (SD)                            | 4.3 (3.7)               | 2.5 (1.5)        | <0.001  |

SD= Standard deviation; EQ-5D-5L - 5 level EQ-5D; HIT-6 = headache impact test; MIDAS = Migraine Disability assessment scale



Table 2. Breakdown of number of NHS appointments per type of activity organised per group and respective number of participants responsible for these appointments (12 months post-recruitment).

| Type of NHS appointment                            | Neurology group (n=128) |             |           | MRI group (n=95)  |             |          | p-value |
|----------------------------------------------------|-------------------------|-------------|-----------|-------------------|-------------|----------|---------|
|                                                    | Total of episodes       | Mean (SD)   | N (%)     | Total of episodes | Mean (SD)   | N (%)    |         |
| <i>Primary Care services</i>                       |                         |             |           |                   |             |          |         |
| GP face-to-face appointment                        | 233                     | 1.82 (2.11) | 91 (71)   | 113               | 1.19 (1.64) | 57 (60)  | 0.006   |
| GP phone appointment                               | 37                      | 0.29 (0.75) | 24 (19)   | 25                | 0.26 (0.49) | 23 (24)  | 0.420   |
| <i>Hospital based services</i>                     |                         |             |           |                   |             |          |         |
| Hospital outpatient appointment                    | 322                     | 2.52 (1.19) | 128 (100) | 25                | 0.26 (0.55) | 20 (21)  | <0.001  |
| Inpatient episode                                  | 4                       | 0.03 (0.35) | 1 (0.8)   | 1                 | 0.01 (0.10) | 1 (1.1)  | 0.837   |
| Emergency Department episode                       | 8                       | 0.06 (0.24) | 8 (6.3)   | 5                 | 0.05 (0.22) | 5 (5.3)  | 0.756   |
| Head CT                                            | 1                       | 0.01 (0.09) | 1 (0.8)   | 1                 | 0.01 (0.10) | 1 (1.1)  | 0.832   |
| Brain MRI                                          | 75                      | 0.59 (0.49) | 75 (59)   | 100               | 1.05 (0.30) | 95 (100) | <0.001  |
| Others (e.g. botox and nerve injection treatments) | 39                      | 0.30 (0.79) | 25 (20)   | 5                 | 0.05 (0.30) | 3 (3.2)  | <0.001  |

Table 3. Difference in the number, mean and percentage reduction of NHS appointments per type of activity organised per group 12 months post-recruitment compared to the 12 months pre-recruitment (note: a negative/positive percentage denotes a decrease/increase in activity following recruitment).

| Type of NHS appointment         | Neurology group (n=128) |       |       | MRI group (n=95)  |       |       |
|---------------------------------|-------------------------|-------|-------|-------------------|-------|-------|
|                                 | Total of episodes       | Mean  | %     | Total of episodes | Mean  | %     |
| <i>Primary Care services</i>    |                         |       |       |                   |       |       |
| GP face-to-face appointment     | -197                    | -1.54 | -85%  | -87               | -0.92 | -77%  |
| GP phone appointment            | -11                     | -0.09 | -30%  | 5                 | 0.05  | 20%   |
| <i>Hospital-based services</i>  |                         |       |       |                   |       |       |
| Hospital outpatient appointment | 301                     | 2.36  | 93%   | 23                | 0.24  | 92%   |
| Inpatient episode               | 3                       | 0.02  | 75%   | 1                 | 0.01  | 100%  |
| Emergency Department episode    | -23                     | -0.18 | -288% | -6                | -0.07 | -120% |
| Head CT                         | -9                      | -0.07 | -12%  | 1                 | 0.01  | 1.0%  |
| Brain MRI                       | 55                      | 0.43  | 141%  | 100               | 1.05  | N/A   |

Table 4. Description of incidental findings, its clinical relevance and subsequent pathway.

| <b>Abnormal findings</b>                                          | <b>Significant (Yes/No)?</b> | <b>Changes in diagnostic or treatment pathway</b>         |
|-------------------------------------------------------------------|------------------------------|-----------------------------------------------------------|
| Mature striatocapsular lacune                                     | No                           |                                                           |
| Sinusitis with complete opacification                             | No                           | ENT review only.                                          |
| Pituitary abnormality (T1)                                        | No                           |                                                           |
| Low lying cerebellar tonsils                                      | No                           |                                                           |
| Previous petrous surgery noted                                    | No                           |                                                           |
| Two aneurysms AcomA (anterior communicating artery) and right ICA | Yes                          | Referred to neurovascular – no coiling (no intervention). |
| No definitive lesion                                              | No                           | Follow-up MRI only.                                       |

Table 5. Descriptive statistics for one generic questionnaire (EQ-5D-5L) and two headache-specific questionnaires (HIT-6 and MIDAS) at baseline and 6 months post-recruitment.

|                 |                 |               | N         | Mean | Standard Deviation | p-value |       |
|-----------------|-----------------|---------------|-----------|------|--------------------|---------|-------|
| <b>BASELINE</b> | <b>EQ-5D-5L</b> | Utility       | Neurology | 127  | 0.809              | 0.182   | 0.097 |
|                 |                 |               | Radiology | 95   | 0.830              | 0.195   |       |
|                 | Score           | Neurology     | 126       | 64.0 | 18.8               | 0.005   |       |
|                 |                 | Radiology     | 95        | 70.8 | 20.2               |         |       |
|                 | <b>HIT-6</b>    | Score         | Neurology | 128  | 65.0               | 5.3     | 0.006 |
|                 |                 |               | Radiology | 92   | 62.6               | 7.3     |       |
|                 | Score           | Neurology     | 124       | 57.8 | 54.0               | 0.075   |       |
|                 |                 | Radiology     | 90        | 44.8 | 44.9               |         |       |
|                 | <b>MIDAS</b>    | Headache days | Neurology | 124  | 51.6               | 31.5    | 0.038 |
|                 |                 |               | Radiology | 90   | 42.8               | 30.7    |       |
|                 |                 | Pain score    | Neurology | 124  | 6.9                | 1.8     | 0.778 |
|                 |                 |               | Radiology | 90   | 6.9                | 1.9     |       |
| <b>MONTH 6</b>  | <b>EQ-5D-5L</b> | Utility       | Neurology | 55   | 0.770              | 0.263   | 0.243 |
|                 |                 |               | Radiology | 26   | 0.681              | 0.346   |       |
|                 | Score           | Neurology     | 53        | 68.2 | 20.6               | 0.463   |       |
|                 |                 | Radiology     | 23        | 62.5 | 24.7               |         |       |
|                 | <b>HIT-6</b>    | Score         | Neurology | 35   | 60.0               | 8.7     | 0.968 |
|                 |                 |               | Radiology | 12   | 53.1               | 22.8    |       |
|                 | Score           | Neurology     | 32        | 52.6 | 58.1               | 0.827   |       |
|                 |                 | Radiology     | 12        | 40.7 | 36.0               |         |       |
|                 | <b>MIDAS</b>    | Headache days | Neurology | 46   | 41.2               | 28.6    | 0.152 |
|                 |                 |               | Radiology | 15   | 26.5               | 28.1    |       |
|                 |                 | Pain score    | Neurology | 44   | 4.5                | 2.3     | 0.663 |
|                 |                 |               | Radiology | 15   | 4.2                | 2.0     |       |

1  
2  
3  
4  
5  
6  
7  
8  
9  
10  
11  
12  
13  
14  
15  
16  
17  
18  
19  
20  
21  
22  
23  
24  
25  
26  
27  
28  
29  
30  
31  
32  
33  
34  
35  
36  
37  
38  
39  
40  
41  
42  
43  
44  
45  
46  
47  
48  
49  
50  
51  
52  
53  
54  
55  
56  
57  
58  
59  
60

For peer review only

1  
2  
3  
4  
5  
6  
7  
8  
9  
10  
11  
12  
13  
14  
15  
16  
17  
18  
19  
20  
21  
22  
23  
24  
25  
26  
27  
28  
29  
30  
31  
32  
33  
34  
35  
36  
37  
38  
39  
40  
41  
42  
43  
44  
45  
46  
47  
48  
49  
50  
51  
52  
53  
54  
55  
56  
57  
58  
59  
60

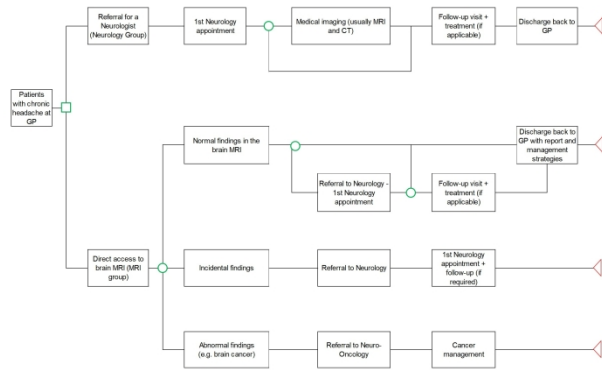

Figure 1. High-level illustration of two existing clinical pathways associated with the referral from GP due to chronic headache.

338x190mm (300 x 300 DPI)

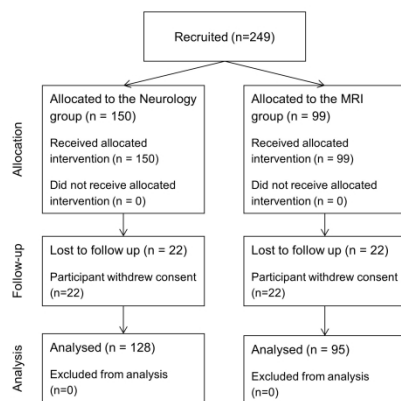

Figure 2. Participant flow chart for the headache study.

338x190mm (300 x 300 DPI)

## Appendix I. Patient satisfaction.

This questionnaire evaluated three dimensions of analysis: (a) referral process (time elapsed between referral from primary care to initial secondary care appointment); (b) initial appointment; and (c) overall experience three months after recruitment.

**(a):** Patient experience questionnaire associated with the referral process to either Neurology (n=99) or Radiology (n=79).

|                                                                        |                  | Not sure |      | Yes |     | No |     | p-value |
|------------------------------------------------------------------------|------------------|----------|------|-----|-----|----|-----|---------|
|                                                                        |                  | N        | %    | N   | %   | N  | %   |         |
| Did you receive your appointment within a timeframe acceptable to you? | Neurology (n=99) | 8        | 8.1% | 66  | 67% | 25 | 25% | 0.193   |
|                                                                        | Radiology (n=79) | 3        | 3.8% | 62  | 79% | 14 | 18% |         |

|                                                                  |                  | Very satisfied |     | Satisfied |     | Neutral |     | Dissatisfied |      | Very dissatisfied |      | p-value |
|------------------------------------------------------------------|------------------|----------------|-----|-----------|-----|---------|-----|--------------|------|-------------------|------|---------|
|                                                                  |                  | N              | %   | N         | %   | N       | %   | N            | %    | N                 | %    |         |
| How satisfied were with the information you received beforehand? | Neurology (n=98) | 25             | 26% | 48        | 49% | 22      | 22% | 3            | 3.1% | 0                 | 0%   | 0.005   |
|                                                                  | Radiology (n=79) | 38             | 50% | 24        | 32% | 10      | 13% | 2            | 2.6% | 2                 | 2.6% |         |



**(b):** Patient experience questionnaire associated with either the Neurology (n=99) or the Radiology (n=50) appointment.

|                                    |                  | Very satisfied |     | Satisfied |     | Neutral |      | Dissatisfied |      | Very dissatisfied |    | p-value |
|------------------------------------|------------------|----------------|-----|-----------|-----|---------|------|--------------|------|-------------------|----|---------|
|                                    |                  | N              | %   | N         | %   | N       | %    | N            | %    | N                 | %  |         |
| How you found the process overall? | Neurology (n=98) | 55             | 56% | 36        | 36% | 5       | 5.1% | 3            | 3.0% | 0                 | 0% | 0.366   |
|                                    | Radiology (n=50) | 27             | 54% | 22        | 44% | 0       | 0.0% | 1            | 2.0% | 0                 | 0% |         |

|                                                                         |                  | A better experience |     | About the same as expected |     | A worse experience |      | p-value |
|-------------------------------------------------------------------------|------------------|---------------------|-----|----------------------------|-----|--------------------|------|---------|
|                                                                         |                  | N                   | %   | N                          | %   | N                  | %    |         |
| How did you find the experience in comparison to what you had expected? | Neurology (n=95) | 57                  | 60% | 35                         | 37% | 3                  | 3.2% | 0.002   |
|                                                                         | Radiology (n=45) | 13                  | 29% | 31                         | 69% | 1                  | 2.2% |         |

(c): Overall patient experience questionnaire at 3 months post-recruitment with either the Neurology (n=56) or the Radiology (n=14) appointment.

|                                            |                  | Very satisfied |      | Satisfied |      | Neutral |     | Dissatisfied |       | Very dissatisfied |      | p-value |
|--------------------------------------------|------------------|----------------|------|-----------|------|---------|-----|--------------|-------|-------------------|------|---------|
|                                            |                  | N              | %    | N         | %    | N       | %   | N            | %     | N                 | %    |         |
| Amount of time spent with clinical staff   | Neurology (n=56) | 20             | 36%  | 30        | 54%  | 6       | 11% | 0            | 0%    | 0                 | 0%   | 0.001   |
|                                            | Radiology (n=14) | 3              | 21%  | 3         | 21%  | 5       | 36% | 1            | 7.1%  | 2                 | 14%  |         |
| Consistency of care                        | Neurology (n=29) | 16             | 55%  | 0         | 0%   | 12      | 41% | 1            | 3.4%  | 0                 | 0%   | 0.028   |
|                                            | Radiology (n=14) | 2              | 14%  | 3         | 21%  | 6       | 43% | 2            | 14.3% | 1                 | 7.1% |         |
| Frequency of appointments                  | Neurology (n=55) | 9              | 16%  | 19        | 35%  | 22      | 40% | 4            | 7.3%  | 1                 | 1.8% | 0.166   |
|                                            | Radiology (n=14) | 2              | 14%  | 1         | 7.1% | 7       | 50% | 3            | 21%   | 1                 | 7.1% |         |
| How informed you felt about your condition | Neurology (n=54) | 15             | 28%  | 24        | 44%  | 9       | 17% | 5            | 9.3%  | 1                 | 1.9% | 0.010   |
|                                            | Radiology (n=13) | 2              | 15%  | 2         | 15%  | 5       | 39% | 1            | 7.7%  | 3                 | 23%  |         |
| How informed you felt about your treatment | Neurology (n=55) | 15             | 27%  | 18        | 33%  | 17      | 31% | 4            | 7.3%  | 1                 | 1.8% | 0.004   |
|                                            | Radiology (n=14) | 1              | 7.1% | 1         | 7.1% | 5       | 36% | 5            | 36%   | 2                 | 14%  |         |
| Your overall experience                    | Neurology (n=55) | 13             | 24%  | 32        | 58%  | 7       | 13% | 3            | 5.5%  | 0                 | 0%   | <0.001  |
|                                            | Radiology (n=14) | 2              | 14%  | 1         | 7.1% | 9       | 64% | 1            | 7.1%  | 1                 | 7.1% |         |

# Reporting checklist for quality improvement study.

Based on the SQUIRE guidelines.

## Instructions to authors

Complete this checklist by entering the page numbers from your manuscript where readers will find each of the items listed below.

Your article may not currently address all the items on the checklist. Please modify your text to include the missing information. If you are certain that an item does not apply, please write "n/a" and provide a short explanation.

Upload your completed checklist as an extra file when you submit to a journal.

In your methods section, say that you used the SQUIRE reporting guidelines, and cite them as:

Ogrinc G, Davies L, Goodman D, Batalden P, Davidoff F, Stevens D. SQUIRE 2.0 (Standards for Quality Improvement Reporting Excellence): revised publication guidelines from a detailed consensus process

|                    | Reporting Item                                                                                                                                                                                                         | Page Number |
|--------------------|------------------------------------------------------------------------------------------------------------------------------------------------------------------------------------------------------------------------|-------------|
| <b>Title</b>       |                                                                                                                                                                                                                        |             |
| <a href="#">#1</a> | Indicate that the manuscript concerns an initiative to improve healthcare (broadly defined to include the quality, safety, effectiveness, patientcenteredness, timeliness, cost, efficiency, and equity of healthcare) | 1           |

## Abstract

[#02a](#) Provide adequate information to aid in searching and indexing 4

[#02b](#) Summarize all key information from various sections of the text using the abstract format of the intended publication or a structured summary such as: background, local problem, methods, interventions, results, conclusions 4

## Introduction

[#3](#) Nature and significance of the local problem description 6

[#4](#) Available knowledge Summary of what is currently known about the problem, including relevant previous studies 6

[#5](#) Rationale Informal or formal frameworks, models, concepts, and / or theories used to explain the problem, any reasons or assumptions that were used to develop the intervention(s), and reasons why the intervention(s) was expected to work 6-7

[#6](#) Specific aims Purpose of the project and of this report 7

## Methods

[#7](#) Context Contextual elements considered important at the outset of introducing the intervention(s) 7

[#08a](#) Intervention(s) Description of the intervention(s) in sufficient detail that others could reproduce it 7

|    |                 |                      |                                                                   |     |
|----|-----------------|----------------------|-------------------------------------------------------------------|-----|
| 1  | Intervention(s) | <a href="#">#08b</a> | Specifics of the team involved in the work                        | 7   |
| 2  |                 |                      |                                                                   |     |
| 3  |                 |                      |                                                                   |     |
| 4  | Study of the    | <a href="#">#09a</a> | Approach chosen for assessing the impact of the                   | 7-8 |
| 5  |                 |                      |                                                                   |     |
| 6  | Intervention(s) |                      | intervention(s)                                                   |     |
| 7  |                 |                      |                                                                   |     |
| 8  |                 |                      |                                                                   |     |
| 9  | Study of the    | <a href="#">#09b</a> | Approach used to establish whether the observed outcomes          | 8-9 |
| 10 |                 |                      |                                                                   |     |
| 11 | Intervention(s) |                      | were due to the intervention(s)                                   |     |
| 12 |                 |                      |                                                                   |     |
| 13 |                 |                      |                                                                   |     |
| 14 |                 |                      |                                                                   |     |
| 15 | Measures        | <a href="#">#10a</a> | Measures chosen for studying processes and outcomes of            | 7-8 |
| 16 |                 |                      |                                                                   |     |
| 17 |                 |                      | the intervention(s), including rationale for choosing them,       |     |
| 18 |                 |                      |                                                                   |     |
| 19 |                 |                      | their operational definitions, and their validity and reliability |     |
| 20 |                 |                      |                                                                   |     |
| 21 |                 |                      |                                                                   |     |
| 22 |                 |                      |                                                                   |     |
| 23 | Measures        | <a href="#">#10b</a> | Description of the approach to the ongoing assessment of          | 7-8 |
| 24 |                 |                      |                                                                   |     |
| 25 |                 |                      | contextual elements that contributed to the success, failure,     |     |
| 26 |                 |                      |                                                                   |     |
| 27 |                 |                      | efficiency, and cost                                              |     |
| 28 |                 |                      |                                                                   |     |
| 29 |                 |                      |                                                                   |     |
| 30 | Measures        | <a href="#">#10c</a> | Methods employed for assessing completeness and                   | 7-8 |
| 31 |                 |                      |                                                                   |     |
| 32 |                 |                      | accuracy of data                                                  |     |
| 33 |                 |                      |                                                                   |     |
| 34 |                 |                      |                                                                   |     |
| 35 |                 |                      |                                                                   |     |
| 36 | Analysis        | <a href="#">#11a</a> | Qualitative and quantitative methods used to draw                 | 8-9 |
| 37 |                 |                      |                                                                   |     |
| 38 |                 |                      | inferences from the data                                          |     |
| 39 |                 |                      |                                                                   |     |
| 40 |                 |                      |                                                                   |     |
| 41 | Analysis        | <a href="#">#11b</a> | Methods for understanding variation within the data,              | 8-9 |
| 42 |                 |                      |                                                                   |     |
| 43 |                 |                      | including the effects of time as a variable                       |     |
| 44 |                 |                      |                                                                   |     |
| 45 |                 |                      |                                                                   |     |
| 46 | Ethical         | <a href="#">#12</a>  | Ethical aspects of implementing and studying the                  | 7   |
| 47 |                 |                      |                                                                   |     |
| 48 | considerations  |                      | intervention(s) and how they were addressed, including, but       |     |
| 49 |                 |                      |                                                                   |     |
| 50 |                 |                      | not limited to, formal ethics review and potential conflict(s) of |     |
| 51 |                 |                      |                                                                   |     |
| 52 |                 |                      | interest                                                          |     |
| 53 |                 |                      |                                                                   |     |
| 54 |                 |                      |                                                                   |     |
| 55 |                 |                      |                                                                   |     |
| 56 | <b>Results</b>  |                      |                                                                   |     |
| 57 |                 |                      |                                                                   |     |
| 58 |                 |                      |                                                                   |     |
| 59 |                 |                      |                                                                   |     |
| 60 |                 |                      |                                                                   |     |

|    |                   |                      |                                                                 |           |
|----|-------------------|----------------------|-----------------------------------------------------------------|-----------|
| 1  |                   | <a href="#">#13a</a> | Initial steps of the intervention(s) and their evolution over   | 9, 17,18  |
| 2  |                   |                      | time (e.g., time-line diagram, flow chart, or table), including |           |
| 3  |                   |                      | modifications made to the intervention during the project       |           |
| 4  |                   |                      |                                                                 |           |
| 5  |                   |                      |                                                                 |           |
| 6  |                   |                      |                                                                 |           |
| 7  |                   |                      |                                                                 |           |
| 8  |                   |                      |                                                                 |           |
| 9  |                   | <a href="#">#13b</a> | Details of the process measures and outcome                     | 10, 11,19 |
| 10 |                   |                      |                                                                 |           |
| 11 |                   |                      |                                                                 |           |
| 12 |                   | <a href="#">#13c</a> | Contextual elements that interacted with the intervention(s)    |           |
| 13 |                   |                      |                                                                 |           |
| 14 |                   |                      |                                                                 |           |
| 15 |                   | <a href="#">#13d</a> | Observed associations between outcomes, interventions,          | 10,11,20- |
| 16 |                   |                      | and relevant contextual elements                                | ,23       |
| 17 |                   |                      |                                                                 |           |
| 18 |                   |                      |                                                                 |           |
| 19 |                   |                      |                                                                 |           |
| 20 |                   | <a href="#">#13e</a> | Unintended consequences such as unexpected benefits,            |           |
| 21 |                   |                      | problems, failures, or costs associated with the                |           |
| 22 |                   |                      | intervention(s).                                                |           |
| 23 |                   |                      |                                                                 |           |
| 24 |                   |                      |                                                                 |           |
| 25 |                   |                      |                                                                 |           |
| 26 |                   |                      |                                                                 |           |
| 27 |                   |                      |                                                                 |           |
| 28 |                   | <a href="#">#13f</a> | Details about missing data                                      | 9         |
| 29 |                   |                      |                                                                 |           |
| 30 |                   |                      |                                                                 |           |
| 31 | <b>Discussion</b> |                      |                                                                 |           |
| 32 |                   |                      |                                                                 |           |
| 33 |                   |                      |                                                                 |           |
| 34 | Summary           | <a href="#">#14a</a> | Key findings, including relevance to the rationale and specific | 12-14     |
| 35 |                   |                      | aims                                                            |           |
| 36 |                   |                      |                                                                 |           |
| 37 |                   |                      |                                                                 |           |
| 38 |                   |                      |                                                                 |           |
| 39 | Summary           | <a href="#">#14b</a> | Particular strengths of the project                             | 14        |
| 40 |                   |                      |                                                                 |           |
| 41 |                   |                      |                                                                 |           |
| 42 |                   |                      |                                                                 |           |
| 43 | Interpretation    | <a href="#">#15a</a> | Nature of the association between the intervention(s) and the   | 12,13     |
| 44 |                   |                      | outcomes                                                        |           |
| 45 |                   |                      |                                                                 |           |
| 46 |                   |                      |                                                                 |           |
| 47 |                   |                      |                                                                 |           |
| 48 | Interpretation    | <a href="#">#15b</a> | Comparison of results with findings from other publications     | 12        |
| 49 |                   |                      |                                                                 |           |
| 50 |                   |                      |                                                                 |           |
| 51 | Interpretation    | <a href="#">#15c</a> | Impact of the project on people and systems                     | 13,14     |
| 52 |                   |                      |                                                                 |           |
| 53 |                   |                      |                                                                 |           |
| 54 | Interpretation    | <a href="#">#15d</a> | Reasons for any differences between observed and                | 12        |
| 55 |                   |                      | anticipated outcomes, including the influence of context        |           |
| 56 |                   |                      |                                                                 |           |
| 57 |                   |                      |                                                                 |           |
| 58 |                   |                      |                                                                 |           |
| 59 |                   |                      |                                                                 |           |
| 60 |                   |                      |                                                                 |           |

|    |                    |                      |                                                               |       |
|----|--------------------|----------------------|---------------------------------------------------------------|-------|
| 1  | Interpretation     | <a href="#">#15e</a> | Costs and strategic trade-offs, including opportunity costs   |       |
| 2  |                    |                      |                                                               |       |
| 3  |                    |                      |                                                               |       |
| 4  | Limitations        | <a href="#">#16a</a> | Limits to the generalizability of the work                    | 14,15 |
| 5  |                    |                      |                                                               |       |
| 6  |                    |                      |                                                               |       |
| 7  | Limitations        | <a href="#">#16b</a> | Factors that might have limited internal validity such as     | 14,15 |
| 8  |                    |                      | confounding, bias, or imprecision in the design, methods,     |       |
| 9  |                    |                      | measurement, or analysis                                      |       |
| 10 |                    |                      |                                                               |       |
| 11 |                    |                      |                                                               |       |
| 12 |                    |                      |                                                               |       |
| 13 |                    |                      |                                                               |       |
| 14 |                    |                      |                                                               |       |
| 15 | Limitations        | <a href="#">#16c</a> | Efforts made to minimize and adjust for limitations           | 14,15 |
| 16 |                    |                      |                                                               |       |
| 17 |                    |                      |                                                               |       |
| 18 | Conclusion         | <a href="#">#17a</a> | Usefulness of the work                                        | 15    |
| 19 |                    |                      |                                                               |       |
| 20 |                    |                      |                                                               |       |
| 21 | Conclusion         | <a href="#">#17b</a> | Sustainability                                                | 15    |
| 22 |                    |                      |                                                               |       |
| 23 |                    |                      |                                                               |       |
| 24 | Conclusion         | <a href="#">#17c</a> | Potential for spread to other contexts                        | 15    |
| 25 |                    |                      |                                                               |       |
| 26 |                    |                      |                                                               |       |
| 27 | Conclusion         | <a href="#">#17d</a> | Implications for practice and for further study in the field  | 15    |
| 28 |                    |                      |                                                               |       |
| 29 |                    |                      |                                                               |       |
| 30 | Conclusion         | <a href="#">#17e</a> | Suggested next steps                                          | 15    |
| 31 |                    |                      |                                                               |       |
| 32 |                    |                      |                                                               |       |
| 33 |                    |                      |                                                               |       |
| 34 | <b>Other</b>       |                      |                                                               |       |
| 35 |                    |                      |                                                               |       |
| 36 | <b>information</b> |                      |                                                               |       |
| 37 |                    |                      |                                                               |       |
| 38 |                    |                      |                                                               |       |
| 39 | Funding            | <a href="#">#18</a>  | Sources of funding that supported this work. Role, if any, of | 5     |
| 40 |                    |                      | the funding organization in the design, implementation,       |       |
| 41 |                    |                      | interpretation, and reporting                                 |       |
| 42 |                    |                      |                                                               |       |
| 43 |                    |                      |                                                               |       |
| 44 |                    |                      |                                                               |       |
| 45 |                    |                      |                                                               |       |

None The SQUIRE 2.0 checklist is distributed under the terms of the Creative Commons Attribution License CC BY-NC 4.0. This checklist can be completed online using <https://www.goodreports.org/>, a tool made by the [EQUATOR Network](#) in collaboration with [Penelope.ai](#)
