# Supplementary material for: Management of chronic headache with referral from primary care to direct access to MRI compared with Neurology services: an observational prospective study in London
Source: PubMed Central journal article supplement — BMJ Open. 2020 Oct 16;10(10):e036097. doi: 10.1136/bmjopen-2019-036097 (PMC7569948; doi:10.1136/bmjopen-2019-036097), 2020-10-16
Supplement: bmjopen-2019-036097supp001.pdf [file bmjopen-2019-036097supp001.pdf]

## Appendix I. Patient satisfaction.

This questionnaire evaluated three dimensions of analysis: (a) referral process (time elapsed between referral from primary care to initial secondary care appointment); (b) initial appointment; and (c) overall experience three months after recruitment.

(a): Patient experience questionnaire associated with the referral process to either Neurology (n=99) or Radiology (n=79).

|                                                                        |                  | Not sure |      | Yes |     | No |     | p-value |
|------------------------------------------------------------------------|------------------|----------|------|-----|-----|----|-----|---------|
|                                                                        |                  | N        | %    | N   | %   | N  | %   |         |
| Did you receive your appointment within a timeframe acceptable to you? | Neurology (n=99) | 8        | 8.1% | 66  | 67% | 25 | 25% | 0.193   |
|                                                                        | Radiology (n=79) | 3        | 3.8% | 62  | 79% | 14 | 18% |         |

|                                                                  |                  | Very satisfied |     | Satisfied |     | Neutral |     | Dissatisfied |      | Very dissatisfied |      | p-value |
|------------------------------------------------------------------|------------------|----------------|-----|-----------|-----|---------|-----|--------------|------|-------------------|------|---------|
|                                                                  |                  | N              | %   | N         | %   | N       | %   | N            | %    | N                 | %    |         |
| How satisfied were with the information you received beforehand? | Neurology (n=98) | 25             | 26% | 48        | 49% | 22      | 22% | 3            | 3.1% | 0                 | 0%   | 0.005   |
|                                                                  | Radiology (n=79) | 38             | 50% | 24        | 32% | 10      | 13% | 2            | 2.6% | 2                 | 2.6% |         |

**(b):** Patient experience questionnaire associated with either the Neurology (n=99) or the Radiology (n=50) appointment.

|                                    |                  | Very satisfied |     | Satisfied |     | Neutral |      | Dissatisfied |      | Very dissatisfied |    | p-value |
|------------------------------------|------------------|----------------|-----|-----------|-----|---------|------|--------------|------|-------------------|----|---------|
|                                    |                  | N              | %   | N         | %   | N       | %    | N            | %    | N                 | %  |         |
| How you found the process overall? | Neurology (n=98) | 55             | 56% | 36        | 36% | 5       | 5.1% | 3            | 3.0% | 0                 | 0% | 0.366   |
|                                    | Radiology (n=50) | 27             | 54% | 22        | 44% | 0       | 0.0% | 1            | 2.0% | 0                 | 0% |         |

|                                                                         |                  | A better experience |     | About the same as expected |     | A worse experience |      | p-value |
|-------------------------------------------------------------------------|------------------|---------------------|-----|----------------------------|-----|--------------------|------|---------|
|                                                                         |                  | N                   | %   | N                          | %   | N                  | %    |         |
| How did you find the experience in comparison to what you had expected? | Neurology (n=95) | 57                  | 60% | 35                         | 37% | 3                  | 3.2% | 0.002   |
|                                                                         | Radiology (n=45) | 13                  | 29% | 31                         | 69% | 1                  | 2.2% |         |

(c): Overall patient experience questionnaire at 3 months post-recruitment with either the Neurology (n=56) or the Radiology (n=14) appointment.

|                                            |                  | Very satisfied |      | Satisfied |      | Neutral |     | Dissatisfied |       | Very dissatisfied |      | p-value |
|--------------------------------------------|------------------|----------------|------|-----------|------|---------|-----|--------------|-------|-------------------|------|---------|
|                                            |                  | N              | %    | N         | %    | N       | %   | N            | %     | N                 | %    |         |
| Amount of time spent with clinical staff   | Neurology (n=56) | 20             | 36%  | 30        | 54%  | 6       | 11% | 0            | 0%    | 0                 | 0%   | 0.001   |
|                                            | Radiology (n=14) | 3              | 21%  | 3         | 21%  | 5       | 36% | 1            | 7.1%  | 2                 | 14%  |         |
| Consistency of care                        | Neurology (n=29) | 16             | 55%  | 0         | 0%   | 12      | 41% | 1            | 3.4%  | 0                 | 0%   | 0.028   |
|                                            | Radiology (n=14) | 2              | 14%  | 3         | 21%  | 6       | 43% | 2            | 14.3% | 1                 | 7.1% |         |
| Frequency of appointments                  | Neurology (n=55) | 9              | 16%  | 19        | 35%  | 22      | 40% | 4            | 7.3%  | 1                 | 1.8% | 0.166   |
|                                            | Radiology (n=14) | 2              | 14%  | 1         | 7.1% | 7       | 50% | 3            | 21%   | 1                 | 7.1% |         |
| How informed you felt about your condition | Neurology (n=54) | 15             | 28%  | 24        | 44%  | 9       | 17% | 5            | 9.3%  | 1                 | 1.9% | 0.010   |
|                                            | Radiology (n=13) | 2              | 15%  | 2         | 15%  | 5       | 39% | 1            | 7.7%  | 3                 | 23%  |         |
| How informed you felt about your treatment | Neurology (n=55) | 15             | 27%  | 18        | 33%  | 17      | 31% | 4            | 7.3%  | 1                 | 1.8% | 0.004   |
|                                            | Radiology (n=14) | 1              | 7.1% | 1         | 7.1% | 5       | 36% | 5            | 36%   | 2                 | 14%  |         |
| Your overall experience                    | Neurology (n=55) | 13             | 24%  | 32        | 58%  | 7       | 13% | 3            | 5.5%  | 0                 | 0%   | <0.001  |
|                                            | Radiology (n=14) | 2              | 14%  | 1         | 7.1% | 9       | 64% | 1            | 7.1%  | 1                 | 7.1% |         |
